# Supplementary material for: Trends and outcomes of late initiation of combination antiretroviral therapy driven by late presentation among HIV-positive Taiwanese patients in the era of treatment scale-up
Source: PLoS One. 2017 Jun 30;12(6):e0179870. doi: 10.1371/journal.pone.0179870 (PMC5493332; doi:10.1371/journal.pone.0179870)
Supplement: S1 Data — (XLSX) [file pone.0179870.s002.xlsx]

## Sheet: CRF_ART initiation
Hospital	Age	Sex	MSM	Hetero	IDU	Other	HBV	HCV	CD4_diag	PVL_diag	CD4_initiation	PVL_initiation	OIs	Late initiation	CD4_500	Duration_FU	ART date (2012/6-2012/11)	ART date (2012/12-2013/5)	ART date (2013/6-2013/11)	ART date (2013/12-2014/5)	ART date (2014/6-2014/11)	ART date (2014/12-2015/5)	ART date (2015/6-2015/11)	ART date (2015/12-2016/5)	NRTI + NNRTI	NRTI + PI	NRTI + II	mortality	Regimen modification	change_AE	change_tx failure	change_virologic failure	change_loss/interrupt	change_simplify	change_other	Duration_change
1	24	1	1	0	0	0	0	0			130.962	59600	0	1	1	6	1	0	0	0	0	0	0	0	1	0	0	0	0	0	0	0	0	0	0	6
1	32	1	1	0	0	0	0	0			227.457	377000	0	0	1	6	1	0	0	0	0	0	0	0	1	0	0	0	1	1	0	0	0	0	0	0.333333
1	29	1	1	0	0	0	0	0			237.937	90200	0	0	1	2.9	1	0	0	0	0	0	0	0	1	0	0	0	1	1	0	0	0	0	0	0.433333
1	48	0	0	1	0	0	0	0			130.886	25200	0	1	1	6	1	0	0	0	0	0	0	0	1	0	0	0	1	1	0	0	0	0	0	0.233333
1	38	1	1	0	0	0	0	0			265.159	12500	0	0	1	6	1	0	0	0	0	0	0	0	1	0	0	0	1	1	0	0	0	0	0	0.466667
1	27	1	1	0	0	0	0	0			311.548	30300	0	0	1	6	1	0	0	0	0	0	0	0	1	0	0	0	1	1	0	0	0	0	0	0.366667
1	34	1	1	0	0	0	0	0			223.069	471000	0	0	1	6	1	0	0	0	0	0	0	0	1	0	0	0	0	0	0	0	0	0	0	6
1	36	1	1	0	0	0	1	0			26.544	78000	1	1	1	6	1	0	0	0	0	0	0	0	1	0	0	0	1	0	1	1	0	0	0	4.53333
1	32	1	1	0	0	0	0	0			206.31	80800	0	0	1	6	1	0	0	0	0	0	0	0	1	0	0	0	1	0	1	1	0	0	0	2.56667
1	27	1	1	0	0	0	0	0			270.075	235000	0	0	1	6	1	0	0	0	0	0	0	0	1	0	0	0	0	0	0	0	0	0	0	6
1	35	1	1	0	0	0	0	0			243.774	9420	0	0	1	6	1	0	0	0	0	0	0	0	1	0	0	0	0	0	0	0	0	0	0	6
1	26	1	1	0	0	0	0	0			258.817	34100	0	0	1	6	1	0	0	0	0	0	0	0	1	0	0	0	0	0	0	0	0	0	0	6
1	42	1	1	0	0	0	0	0			235.467	66000	0	0	1	0.7	1	0	0	0	0	0	0	0	1	0	0	0	1	0	1	0	1	0	0	0.7
1	30	1	1	0	0	0	0	0			156.33	110000	0	1	1	6	1	0	0	0	0	0	0	0	1	0	0	0	0	0	0	0	0	0	0	6
1	31	1	1	0	0	0	1	0			121.716	6460	0	1	1	6	1	0	0	0	0	0	0	0	1	0	0	0	0	0	0	0	0	0	0	6
1	31	1	1	0	0	0	0	0			372.54	43100	0	0	1	6	1	0	0	0	0	0	0	0	1	0	0	0	1	1	0	0	0	0	0	0.433333
1	43	1	1	0	0	0	0	0			251.218	30700	0	0	1	6	1	0	0	0	0	0	0	0	1	0	0	0	0	0	0	0	0	0	0	6
1	34	1	1	0	0	0	0	0			84.66	151000	0	1	1	6	1	0	0	0	0	0	0	0	1	0	0	0	1	1	0	0	0	0	0	0.433333
1	23	1	1	0	0	0	0	0			174.876	232000	0	1	1	6	1	0	0	0	0	0	0	0	1	0	0	0	1	1	0	0	0	0	0	1.36667
1	20	1	1	0	0	0	0	0			226.627	173000	0	0	1	6	1	0	0	0	0	0	0	0	1	0	0	0	1	0	1	1	0	0	0	0.533333
1	28	1	1	0	0	0	0	0			179.45	378000	0	1	1	6	1	0	0	0	0	0	0	0	1	0	0	0	0	0	0	0	0	0	0	6
1	36	1	1	0	0	0	1	0			844.074	40900	0	0	0	6	1	0	0	0	0	0	0	0	1	0	0	0	0	0	0	0	0	0	0	6
1	35	1	1	0	0	0	0	0			257.58	1120000	0	0	1	6	1	0	0	0	0	0	0	0	1	0	0	0	1	1	0	0	0	0	0	0.466667
1	20	1	1	0	0	0	0	0			648.394	75700	0	0	0	6	1	0	0	0	0	0	0	0	1	0	0	0	0	0	0	0	0	0	0	6
1	38	1	1	0	0	0	0	0			327.226	83300	0	0	1	6	1	0	0	0	0	0	0	0	1	0	0	0	1	1	0	0	0	0	0	2.33333
1	30	1	1	0	0	0	0	0			775.267	957000	0	0	0	6	1	0	0	0	0	0	0	0	1	0	0	0	1	1	0	0	0	0	0	0.866667
1	45	1	1	0	0	0	0	0			199.711	36600	1	1	1	6	1	0	0	0	0	0	0	0	1	0	0	0	0	0	0	0	0	0	0	6
1	54	1	0	1	0	0	0	0			12.6	37200	1	1	1	6	1	0	0	0	0	0	0	0	0	0	1	0	0	0	0	0	0	0	0	6
1	28	1	1	0	0	0	0	0			123.796	54800	0	1	1	6	1	0	0	0	0	0	0	0	1	0	0	0	1	1	0	0	0	0	0	0.4
1	26	1	1	0	0	0	0	0			23.6	357000	1	1	1	6	1	0	0	0	0	0	0	0	1	0	0	0	1	0	1	1	0	0	0	0.5
1	22	1	1	0	0	0	0	0			139.874	10000	0	1	1	6	1	0	0	0	0	0	0	0	1	0	0	0	0	0	0	0	0	0	0	6
1	25	1	1	0	0	0	0	0			351.234	3900	0	0	1	6	1	0	0	0	0	0	0	0	1	0	0	0	0	0	0	0	0	0	0	6
1	43	1	1	0	0	0	1	0			63.9331	141000	0	1	1	6	1	0	0	0	0	0	0	0	1	0	0	0	0	0	0	0	0	0	0	6
1	37	1	1	0	0	0	1	0			114.733	50800	0	1	1	6	1	0	0	0	0	0	0	0	1	0	0	0	0	0	0	0	0	0	0	6
1	42	1	0	0	1	0	0	0			190.902	16900	0	1	1	6	1	0	0	0	0	0	0	0	1	0	0	0	1	1	0	0	0	0	0	3.73333
1	43	1	1	0	0	0	0	0			195.187	156000	0	1	1	6	1	0	0	0	0	0	0	0	1	0	0	0	0	0	0	0	0	0	0	6
1	44	1	0	0	1	0	0	1			6.72	42900	0	1	1	4.9	1	0	0	0	0	0	0	0	1	0	0	0	1	1	0	0	0	0	0	1.33333
1	46	1	1	0	0	0	0	0			478.526	275	0	0	1	6	1	0	0	0	0	0	0	0	1	0	0	0	0	0	0	0	0	0	0	6
1	36	1	1	0	0	0	1	0			105.648	133000	0	1	1	6	1	0	0	0	0	0	0	0	1	0	0	0	0	0	0	0	0	0	0	6
1	31	1	1	0	0	0	0	0			48.2151	9780	0	1	1	6	1	0	0	0	0	0	0	0	1	0	0	0	1	1	0	0	0	0	0	1.3
1	60	1	1	0	0	0	0	0			145.672	102000	0	1	1	6	1	0	0	0	0	0	0	0	1	0	0	0	1	1	0	0	0	0	0	0.3
1	27	1	1	0	0	0	0	0			334.62	10700	0	0	1	6	1	0	0	0	0	0	0	0	1	0	0	0	1	1	0	0	0	0	0	1.43333
1	27	1	1	0	0	0	0	0			254.604	148000	0	0	1	6	1	0	0	0	0	0	0	0	1	0	0	0	1	1	0	0	0	0	0	0.966667
1	32	1	1	0	0	0	0	0			506.282	26600	0	0	0	6	1	0	0	0	0	0	0	0	1	0	0	0	1	0	0	0	0	1	0	4.2
1	40	1	1	0	0	0	0	0			198.36	6560	0	1	1	6	1	0	0	0	0	0	0	0	1	0	0	0	1	1	0	0	0	0	0	5.83333
1	26	1	1	0	0	0	0	0			307.498	91000	0	0	1	6	1	0	0	0	0	0	0	0	1	0	0	0	1	1	0	0	0	0	0	0.933333
1	42	1	1	0	0	0	0	0			32.0212	93200	1	1	1	6	1	0	0	0	0	0	0	0	1	0	0	0	0	0	0	0	0	0	0	6
1	26	1	1	0	0	0	0	0			268.622	76600	0	0	1	6	1	0	0	0	0	0	0	0	1	0	0	0	0	0	0	0	0	0	0	6
1	30	1	1	0	0	0	0	0			194.04	209000	0	1	1	6	1	0	0	0	0	0	0	0	1	0	0	0	0	0	0	0	0	0	0	6
1	31	1	1	0	0	0	1	0			179.458	40000	0	1	1	6	1	0	0	0	0	0	0	0	1	0	0	0	1	1	0	0	0	0	0	0.333333
1	74	1	1	0	0	0	0	0			31.8	740000	1	1	1	6	1	0	0	0	0	0	0	0	0	0	1	0	0	0	0	0	0	0	0	6
1	34	1	1	0	0	0	0	0			307.675	119000	0	0	1	6	1	0	0	0	0	0	0	0	1	0	0	0	1	1	0	0	0	0	0	0.466667
1	33	1	1	0	0	0	1	0			364.366	79300	0	0	1	6	1	0	0	0	0	0	0	0	1	0	0	0	0	0	0	0	0	0	0	6
1	23	1	1	0	0	0	0	0			26.752	166000	0	1	1	6	1	0	0	0	0	0	0	0	1	0	0	0	0	0	0	0	0	0	0	6
1	27	1	1	0	0	0	0	0			61.523	10000000	0	1	1	6	1	0	0	0	0	0	0	0	1	0	0	0	1	1	0	0	0	0	0	0.233333
1	30	1	1	0	0	0	0	0			234	106000	0	0	1	6	1	0	0	0	0	0	0	0	1	0	0	0	1	1	0	0	0	0	0	0.566667
1	32	1	1	0	0	0	1	0			8.868	51200	1	1	1	6	1	0	0	0	0	0	0	0	1	0	0	0	0	0	0	0	0	0	0	6
1	33	1	1	0	0	0	0	0			16.048	166000	0	1	1	6	1	0	0	0	0	0	0	0	1	0	0	0	0	0	0	0	0	0	0	6
1	45	1	1	0	0	0	1	0			327.634	5410000	0	0	1	6	1	0	0	0	0	0	0	0	1	0	0	0	0	0	0	0	0	0	0	6
1	28	1	1	0	0	0	0	0			61.248	1770000	1	1	1	6	1	0	0	0	0	0	0	0	1	0	0	0	1	1	0	0	0	0	0	0.466667
1	40	1	1	0	0	0	0	0			38.5165	427000	0	1	1	6	1	0	0	0	0	0	0	0	1	0	0	0	0	0	0	0	0	0	0	6
1	27	1	1	0	0	0	1	0			89.739	143000	0	1	1	6	1	0	0	0	0	0	0	0	1	0	0	0	0	0	0	0	0	0	0	6
1	61	1	1	0	0	0	0	0			39.36	987000	1	1	1	6	1	0	0	0	0	0	0	0	1	0	0	0	1	1	0	0	0	0	0	0.2
1	44	1	1	0	0	0	0	0			193.44	117000	0	1	1	6	1	0	0	0	0	0	0	0	1	0	0	0	0	0	0	0	0	0	0	6
1	28	1	1	0	0	0	0	0			320.443	6980	0	0	1	6	1	0	0	0	0	0	0	0	1	0	0	0	0	0	0	0	0	0	0	6
1	31	1	1	0	0	0	0	0			379.776	51000	0	0	1	6	1	0	0	0	0	0	0	0	1	0	0	0	1	1	0	0	0	0	0	2.1
1	29	1	1	0	0	0	0	0			86.052	145000	0	1	1	6	1	0	0	0	0	0	0	0	1	0	0	0	1	1	0	0	0	0	0	0.4
1	31	1	1	0	0	0	0	0			591.192	8590	0	0	0	6	1	0	0	0	0	0	0	0	0	1	0	0	1	1	0	0	0	0	0	0.933333
1	28	1	1	0	0	0	0	0			134.596	6760	0	1	1	6	1	0	0	0	0	0	0	0	1	0	0	0	0	0	0	0	0	0	0	6
1	27	1	1	0	0	0	0	0			95.0912	54200	0	1	1	6	1	0	0	0	0	0	0	0	1	0	0	0	1	1	0	0	0	0	0	0.466667
1	21	1	1	0	0	0	0	0			166.5	30700	0	1	1	6	1	0	0	0	0	0	0	0	1	0	0	0	1	1	0	0	0	0	0	0.466667
1	32	1	1	0	0	0	0	0			37.468	1470000	0	1	1	6	1	0	0	0	0	0	0	0	1	0	0	0	0	0	0	0	0	0	0	6
1	26	1	1	0	0	0	0	0			418.517	18500	0	0	1	6	1	0	0	0	0	0	0	0	1	0	0	0	1	1	0	0	0	0	0	3.03333
1	28	1	1	0	0	0	0	0			363.6	65300	0	0	1	6	1	0	0	0	0	0	0	0	1	0	0	0	1	1	0	0	0	0	0	0.466667
1	21	1	1	0	0	0	0	0			237.01	311000	0	0	1	6	1	0	0	0	0	0	0	0	1	0	0	0	1	1	0	0	0	0	0	3.03333
1	26	1	1	0	0	0	0	0			211.643	5410	0	0	1	6	1	0	0	0	0	0	0	0	1	0	0	0	0	0	0	0	0	0	0	6
1	28	1	1	0	0	0	0	0			483.714	195000	0	0	1	6	1	0	0	0	0	0	0	0	1	0	0	0	1	0	1	1	0	0	0	2.56667
1	34	1	1	0	0	0	1	0			93.536	302000	1	1	1	6	1	0	0	0	0	0	0	0	1	0	0	0	1	0	1	1	0	0	0	1.13333
1	29	1	1	0	0	0	0	0			455.914	44900	0	0	1	6	1	0	0	0	0	0	0	0	1	0	0	0	0	0	0	0	0	0	0	6
1	31	1	1	0	0	0	0	0			258.937	24200	0	0	1	6	1	0	0	0	0	0	0	0	1	0	0	0	1	1	0	0	0	0	0	3.96667
1	46	1	1	0	0	0	0	0			193.709	1110000	0	1	1	6	1	0	0	0	0	0	0	0	0	0	1	0	0	0	0	0	0	0	0	6
1	41	1	1	0	0	0	0	0			11.9472	86200	1	1	1	6	1	0	0	0	0	0	0	0	1	0	0	0	1	1	0	0	0	0	0	0.833333
1	55	1	1	0	0	0	1	0			125.488	107000	0	1	1	6	1	0	0	0	0	0	0	0	1	0	0	0	0	0	0	0	0	0	0	6
1	23	1	1	0	0	0	0	0			259.47	47400	0	0	1	6	1	0	0	0	0	0	0	0	1	0	0	0	0	0	0	0	0	0	0	6
1	32	1	1	0	0	0	0	0			284.575	145000	0	0	1	6	1	0	0	0	0	0	0	0	1	0	0	0	1	1	0	0	0	0	0	1.43333
1	19	1	1	0	0	0	0	0			302.72	412000	0	0	1	6	1	0	0	0	0	0	0	0	1	0	0	0	1	1	0	0	0	0	0	0.266667
1	40	1	1	0	0	0	0	0			66.8736	701000	1	1	1	6	1	0	0	0	0	0	0	0	0	1	0	0	1	1	0	0	0	0	0	3.93333
1	43	1	1	0	0	0	0	0			559.318	43900	0	0	0	6	1	0	0	0	0	0	0	0	1	0	0	0	0	0	0	0	0	0	0	6
1	30	1	1	0	0	0	0	0			380.556	11900	0	0	1	6	1	0	0	0	0	0	0	0	0	1	0	0	0	0	0	0	0	0	0	6
1	28	1	1	0	0	0	0	0			92.9628	3840000	0	1	1	6	1	0	0	0	0	0	0	0	1	0	0	0	1	1	0	0	0	0	0	0.833333
1	39	1	1	0	0	0	0	0			28.1952	509000	1	1	1	6	1	0	0	0	0	0	0	0	1	0	0	0	1	1	0	0	0	0	0	0.266667
1	22	1	1	0	0	0	0	0			324.221	41100	0	0	1	6	1	0	0	0	0	0	0	0	1	0	0	0	1	1	0	0	0	0	0	0.533333
1	44	1	1	0	0	0	0	0			13.983	442000	0	1	1	6	1	0	0	0	0	0	0	0	1	0	0	0	0	0	0	0	0	0	0	6
1	35	1	1	0	0	0	0	0			40.5093	120000	1	1	1	6	1	0	0	0	0	0	0	0	1	0	0	0	0	0	0	0	0	0	0	6
1	80	0	0	1	0	0	0	0			472.878	346000	0	0	1	6	1	0	0	0	0	0	0	0	0	0	1	0	0	0	0	0	0	0	0	6
1	33	1	1	0	0	0	0	0			215.865	114000	0	0	1	6	1	0	0	0	0	0	0	0	1	0	0	0	0	0	0	0	0	0	0	6
1	28	1	1	0	0	0	0	0			461.58	378000	0	0	1	6	1	0	0	0	0	0	0	0	1	0	0	0	0	0	0	0	0	0	0	6
1	55	1	1	0	0	0	0	0			31.0688	303000	0	1	1	6	1	0	0	0	0	0	0	0	1	0	0	0	1	1	0	0	0	0	0	0.633333
1	31	1	1	0	0	0	0	0			275.502	62000	0	0	1	6	1	0	0	0	0	0	0	0	1	0	0	0	1	1	0	0	0	0	0	0.333333
1	35	1	1	0	0	0	0	0			163.431	10000000	0	1	1	6	1	0	0	0	0	0	0	0	1	0	0	0	1	1	0	0	0	0	0	0.4
1	30	1	1	0	0	0	1	0			145.58	449100	0	1	1	6	1	0	0	0	0	0	0	0	1	0	0	0	0	0	0	0	0	0	0	6
1	31	1	1	0	0	0	0	0			302.593	24400	0	0	1	6	1	0	0	0	0	0	0	0	1	0	0	0	1	1	0	0	0	0	0	0.3
1	21	1	1	0	0	0	0	0			166.873	216000	0	1	1	6	1	0	0	0	0	0	0	0	1	0	0	0	1	1	0	0	0	0	0	1.16667
1	20	1	1	0	0	0	0	0			331.884	93500	0	0	1	6	1	0	0	0	0	0	0	0	1	0	0	0	1	1	0	0	0	0	0	0.933333
1	24	1	1	0	0	0	0	1			341.92	40500	0	0	1	6	1	0	0	0	0	0	0	0	1	0	0	0	1	1	0	0	0	0	0	0.466667
1	42	1	1	0	0	0	0	0			138.553	864000	1	1	1	6	1	0	0	0	0	0	0	0	1	0	0	0	1	1	0	0	0	0	0	0.4
1	33	1	1	0	0	0	0	0			291.564	40000	0	0	1	6	1	0	0	0	0	0	0	0	1	0	0	0	0	0	0	0	0	0	0	6
1	49	0	0	1	0	0	0	0			242.315	447000	0	0	1	6	1	0	0	0	0	0	0	0	1	0	0	0	1	1	0	0	0	0	0	3.66667
1	32	1	1	0	0	0	0	0			135.937	118000	1	1	1	6	1	0	0	0	0	0	0	0	0	1	0	0	0	0	0	0	0	0	0	6
1	27	1	1	0	0	0	0	0			247.776	74100	0	0	1	6	1	0	0	0	0	0	0	0	1	0	0	0	1	1	0	0	0	0	0	5.66667
1	28	1	1	0	0	0	0	0			15.572	174000	0	1	1	6	1	0	0	0	0	0	0	0	1	0	0	0	1	1	0	0	0	0	0	2.06667
1	33	1	1	0	0	0	0	0			181.734	59800	0	1	1	6	1	0	0	0	0	0	0	0	1	0	0	0	0	0	0	0	0	0	0	6
1	27	1	1	0	0	0	0	0			1.28	2000000	1	1	1	6	1	0	0	0	0	0	0	0	1	0	0	0	1	0	1	1	0	0	0	4.2
1	28	1	1	0	0	0	1	0			100.005	47500	1	1	1	6	1	0	0	0	0	0	0	0	1	0	0	0	0	0	0	0	0	0	0	6
1	23	1	1	0	0	0	0	0			292.6	87600	0	0	1	6	1	0	0	0	0	0	0	0	1	0	0	0	1	1	0	0	0	0	0	0.333333
1	45	1	0	0	1	0	0	0			284.305	16200	0	0	1	6	1	0	0	0	0	0	0	0	1	0	0	0	0	0	0	0	0	0	0	6
1	54	1	1	0	0	0	0	0			127.104	374000	1	1	1	6	1	0	0	0	0	0	0	0	1	0	0	0	1	0	1	1	0	0	0	0.566667
1	40	1	1	0	0	0	0	0			289.307	343000	0	0	1	6	1	0	0	0	0	0	0	0	1	0	0	0	1	1	0	0	0	0	0	0.366667
1	24	1	1	0	0	0	0	0			206.925	29100	0	0	1	6	1	0	0	0	0	0	0	0	1	0	0	0	1	1	0	0	0	0	0	1.36667
1	31	1	1	0	0	0	0	0			132.51	415000	0	1	1	6	1	0	0	0	0	0	0	0	1	0	0	0	0	0	0	0	0	0	0	6
1	40	1	1	0	0	0	1	0			289.445	10700	0	0	1	6	1	0	0	0	0	0	0	0	1	0	0	0	0	0	0	0	0	0	0	6
1	26	1	1	0	0	0	0	0			220.828	11800	0	0	1	6	1	0	0	0	0	0	0	0	1	0	0	0	0	0	0	0	0	0	0	6
1	24	1	1	0	0	0	0	0			412.888	7300	0	0	1	6	1	0	0	0	0	0	0	0	1	0	0	0	0	0	0	0	0	0	0	6
1	40	1	1	0	0	0	0	0			358.877	110000	0	0	1	6	1	0	0	0	0	0	0	0	1	0	0	0	1	1	0	0	0	0	0	0.733333
1	29	1	1	0	0	0	0	0			294.372	62900	0	0	1	6	1	0	0	0	0	0	0	0	1	0	0	0	0	0	0	0	0	0	0	6
1	40	1	1	0	0	0	0	0			16.7895	488000	1	1	1	6	1	0	0	0	0	0	0	0	1	0	0	0	0	0	0	0	0	0	0	6
1	39	1	1	0	0	0	0	0			32.794	278000	0	1	1	6	0	1	0	0	0	0	0	0	1	0	0	0	0	0	0	0	0	0	0	6
1	22	1	1	0	0	0	0	0			319.116	29000	0	0	1	6	0	1	0	0	0	0	0	0	1	0	0	0	0	0	0	0	0	0	0	6
1	24	1	1	0	0	0	0	0			275.4	19400	0	0	1	6	0	1	0	0	0	0	0	0	1	0	0	0	1	1	0	0	0	0	0	0.366667
1	34	1	1	0	0	0	0	0			256.09	9900	0	0	1	6	0	1	0	0	0	0	0	0	1	0	0	0	1	1	0	0	0	0	0	0.233333
1	32	1	1	0	0	0	1	0			5.589	137000	0	1	1	6	0	1	0	0	0	0	0	0	1	0	0	0	0	0	0	0	0	0	0	6
1	34	1	1	0	0	0	0	0			304.949	42900	0	0	1	6	0	1	0	0	0	0	0	0	1	0	0	0	0	0	0	0	0	0	0	6
1	25	1	1	0	0	0	0	0			261.504	609000	0	0	1	6	0	1	0	0	0	0	0	0	1	0	0	0	0	0	0	0	0	0	0	6
1	37	1	1	0	0	0	0	0			395.346	130000	0	0	1	6	0	1	0	0	0	0	0	0	1	0	0	0	0	0	0	0	0	0	0	6
1	28	1	1	0	0	0	1	1			322.558	10900	0	0	1	6	0	1	0	0	0	0	0	0	1	0	0	0	0	0	0	0	0	0	0	6
1	24	1	1	0	0	0	0	0			435.094	56300	0	0	1	6	0	1	0	0	0	0	0	0	1	0	0	0	1	1	0	0	0	0	0	0.433333
1	21	1	1	0	0	0	0	0			249.064	69000	0	0	1	6	0	1	0	0	0	0	0	0	1	0	0	0	1	1	0	0	0	0	0	0.466667
1	31	1	1	0	0	0	0	0			327.309	6220	0	0	1	6	0	1	0	0	0	0	0	0	1	0	0	0	1	1	0	0	0	0	0	0.466667
1	27	1	1	0	0	0	0	0			278.176	41400	0	0	1	6	0	1	0	0	0	0	0	0	1	0	0	0	0	0	0	0	0	0	0	6
1	37	1	1	0	0	0	0	0			203.912	304000	0	0	1	6	0	1	0	0	0	0	0	0	1	0	0	0	0	0	0	0	0	0	0	6
1	25	1	1	0	0	0	0	0			454.818	24200	0	0	1	6	0	1	0	0	0	0	0	0	1	0	0	0	0	0	0	0	0	0	0	6
1	31	1	1	0	0	0	0	1			256.143	144000	0	0	1	6	0	1	0	0	0	0	0	0	1	0	0	0	1	0	1	1	0	0	0	1.4
1	39	1	1	0	0	0	1	1			406.336	50400	0	0	1	6	0	1	0	0	0	0	0	0	1	0	0	0	1	1	0	0	0	0	0	0.5
1	31	1	1	0	0	0	0	0			387.828	30800	0	0	1	6	0	1	0	0	0	0	0	0	1	0	0	0	1	1	0	0	0	0	0	0.533333
1	39	1	1	0	0	0	0	0			504.968	51500	0	0	0	6	0	1	0	0	0	0	0	0	1	0	0	0	1	1	0	0	0	0	0	0.7
1	19	1	1	0	0	0	0	0			654.327	18500	0	0	0	6	0	1	0	0	0	0	0	0	1	0	0	0	0	0	0	0	0	0	0	6
1	21	1	1	0	0	0	0	0			389.006	287000	0	0	1	6	0	1	0	0	0	0	0	0	1	0	0	0	1	1	0	0	0	0	0	3.96667
1	28	1	1	0	0	0	1	0			549.275	44100	0	0	0	6	0	1	0	0	0	0	0	0	1	0	0	0	0	0	0	0	0	0	0	6
1	30	1	1	0	0	0	0	0			243.535	48700	0	0	1	6	0	1	0	0	0	0	0	0	1	0	0	0	1	1	0	0	0	0	0	0.3
1	29	1	1	0	0	0	0	0			238.698	73900	0	0	1	6	0	1	0	0	0	0	0	0	1	0	0	0	1	1	0	0	0	0	0	2.1
1	38	1	1	0	0	0	0	0			334.854	36800	0	0	1	6	0	1	0	0	0	0	0	0	1	0	0	0	1	1	0	0	0	0	0	0.733333
1	30	1	1	0	0	0	0	1			335.876	16400	0	0	1	6	0	1	0	0	0	0	0	0	0	1	0	0	1	0	0	0	0	0	1	2.8
1	41	1	1	0	0	0	0	0			58.08	78000	1	1	1	6	0	1	0	0	0	0	0	0	1	0	0	0	0	0	0	0	0	0	0	6
1	32	1	1	0	0	0	0	0			392.377	24700	0	0	1	6	0	1	0	0	0	0	0	0	1	0	0	0	1	1	0	0	0	0	0	0.666667
1	37	1	1	0	0	0	1	0			334.487	33600	0	0	1	6	0	1	0	0	0	0	0	0	1	0	0	0	0	0	0	0	0	0	0	6
1	23	1	1	0	0	0	0	0			206.712	61300	0	0	1	6	0	1	0	0	0	0	0	0	1	0	0	0	1	1	0	0	0	0	0	2.33333
1	34	1	1	0	0	0	0	1			179.585	17700	0	1	1	6	0	1	0	0	0	0	0	0	1	0	0	0	1	1	0	0	0	0	0	1.4
1	24	1	1	0	0	0	0	0			338.72	48600	0	0	1	6	0	1	0	0	0	0	0	0	1	0	0	0	1	1	0	0	0	0	0	0.466667
1	35	1	1	0	0	0	0	0			8.757	288000	1	1	1	6	0	1	0	0	0	0	0	0	1	0	0	0	0	0	0	0	0	0	0	6
1	24	1	1	0	0	0	0	0			478.526	8180	0	0	1	6	0	1	0	0	0	0	0	0	1	0	0	0	1	1	0	0	0	0	0	0.233333
1	29	1	1	0	0	0	0	0			324.779	244000	0	0	1	6	0	1	0	0	0	0	0	0	1	0	0	0	0	0	0	0	0	0	0	6
1	35	1	1	0	0	0	0	0			489.22	106000	0	0	1	1.56667	0	1	0	0	0	0	0	0	1	0	0	0	1	1	0	0	0	0	0	1.26667
1	28	1	1	0	0	0	0	0			42.6844	1760000	1	1	1	6	0	1	0	0	0	0	0	0	1	0	0	0	0	0	0	0	0	0	0	6
1	45	1	1	0	0	0	0	0			385.803	72800	0	0	1	6	0	1	0	0	0	0	0	0	1	0	0	0	0	0	0	0	0	0	0	6
1	39	1	1	0	0	0	0	0			10.9288	191000	1	1	1	6	0	1	0	0	0	0	0	0	1	0	0	0	0	0	0	0	0	0	0	6
1	35	1	1	0	0	0	0	1			220.561	31900	0	0	1	6	0	1	0	0	0	0	0	0	1	0	0	0	0	0	0	0	0	0	0	6
1	33	1	1	0	0	0	0	0			38.976	11600	1	1	1	6	0	1	0	0	0	0	0	0	1	0	0	0	1	1	0	0	0	0	0	0.166667
1	39	1	1	0	0	0	0	0			276.318	215000	0	0	1	6	0	1	0	0	0	0	0	0	1	0	0	0	1	1	0	0	0	0	0	0.466667
1	40	1	1	0	0	0	0	0			114.049	292000	0	1	1	6	0	1	0	0	0	0	0	0	1	0	0	0	0	0	0	0	0	0	0	6
1	21	1	1	0	0	0	0	0			264.614	15000	0	0	1	6	0	1	0	0	0	0	0	0	1	0	0	0	1	1	0	0	0	0	0	0.466667
1	25	1	1	0	0	0	0	0			38.48	136000	1	1	1	6	0	1	0	0	0	0	0	0	1	0	0	0	1	1	0	0	0	0	0	1.66667
1	41	1	1	0	0	0	0	0			159.552	2290000	1	1	1	6	0	1	0	0	0	0	0	0	1	0	0	0	0	0	0	0	0	0	0	6
1	44	1	1	0	0	0	0	0			370.475	12400	0	0	1	6	0	1	0	0	0	0	0	0	1	0	0	0	0	0	0	0	0	0	0	6
1	30	1	1	0	0	0	0	0			183.784	295000	0	1	1	6	0	1	0	0	0	0	0	0	1	0	0	0	0	0	0	0	0	0	0	6
1	29	1	1	0	0	0	0	0			627.48	149000	0	0	0	6	0	1	0	0	0	0	0	0	0	0	1	0	1	0	0	0	0	0	1	0.5
1	35	1	1	0	0	0	1	0			27.072	258000	1	1	1	6	0	1	0	0	0	0	0	0	1	0	0	0	0	0	0	0	0	0	0	6
1	24	1	1	0	0	0	0	0			323.692	36300	0	0	1	6	0	1	0	0	0	0	0	0	1	0	0	0	0	0	0	0	0	0	0	6
1	30	1	1	0	0	0	0	0			217.58	75800	0	0	1	6	0	1	0	0	0	0	0	0	0	0	1	0	0	0	0	0	0	0	0	6
1	36	1	1	0	0	0	0	0			481.048	551000	0	0	1	6	0	1	0	0	0	0	0	0	1	0	0	0	1	1	0	0	0	0	0	0.466667
1	36	1	1	0	0	0	0	1			166.574	1010000	1	1	1	6	0	1	0	0	0	0	0	0	1	0	0	0	0	0	0	0	0	0	0	6
1	33	1	1	0	0	0	0	0			17.4762	798000	0	1	1	6	0	1	0	0	0	0	0	0	1	0	0	0	0	0	0	0	0	0	0	6
1	28	1	1	0	0	0	1	0			389.07	41200	0	0	1	6	0	1	0	0	0	0	0	0	1	0	0	0	0	0	0	0	0	0	0	6
1	27	1	1	0	0	0	0	1			31.458	91200	1	1	1	6	0	1	0	0	0	0	0	0	1	0	0	0	1	1	0	0	0	0	0	0.266667
1	41	1	1	0	0	0	0	0			264.911	53200	0	0	1	6	0	1	0	0	0	0	0	0	1	0	0	0	1	1	0	0	0	0	0	0.466667
1	48	1	1	0	0	0	0	0			26.1744	184000	1	1	1	6	0	1	0	0	0	0	0	0	1	0	0	0	0	0	0	0	0	0	0	6
1	35	1	1	0	0	0	0	0			235.549	18700	0	0	1	6	0	1	0	0	0	0	0	0	1	0	0	0	0	0	0	0	0	0	0	6
1	36	1	1	0	0	0	0	0			438.926	27200	0	0	1	6	0	1	0	0	0	0	0	0	0	0	1	0	1	1	0	0	0	0	0	1.4
1	42	1	1	0	0	0	0	0			228.114	46600	0	0	1	6	0	1	0	0	0	0	0	0	1	0	0	0	0	0	0	0	0	0	0	6
1	35	1	1	0	0	0	0	0			144.038	136000	1	1	1	6	0	1	0	0	0	0	0	0	1	0	0	0	0	0	0	0	0	0	0	6
1	26	1	1	0	0	0	0	0			488.519	68700	0	0	1	6	0	1	0	0	0	0	0	0	1	0	0	0	0	0	0	0	0	0	0	6
1	47	1	1	0	0	0	0	0			15.345	63100	1	1	1	6	0	1	0	0	0	0	0	0	1	0	0	0	0	0	0	0	0	0	0	6
1	28	1	1	0	0	0	0	0			308.491	20100	0	0	1	6	0	1	0	0	0	0	0	0	1	0	0	0	1	1	0	0	0	0	0	1.43333
1	31	1	1	0	0	0	0	0			414.568	20900	0	0	1	6	0	1	0	0	0	0	0	0	1	0	0	0	1	1	0	0	0	0	0	0.466667
1	28	1	1	0	0	0	0	0			289.476	31400	0	0	1	6	0	1	0	0	0	0	0	0	1	0	0	0	0	0	0	0	0	0	0	6
1	43	1	1	0	0	0	0	0			24.5367	475000	0	1	1	6	0	1	0	0	0	0	0	0	1	0	0	0	0	0	0	0	0	0	0	6
1	25	1	1	0	0	0	0	0			259.515	11300	0	0	1	6	0	1	0	0	0	0	0	0	1	0	0	0	0	0	0	0	0	0	0	6
1	32	1	1	0	0	0	0	0			154.224	332000	0	1	1	6	0	1	0	0	0	0	0	0	1	0	0	0	0	0	0	0	0	0	0	6
1	29	1	1	0	0	0	0	0			185.31	322000	0	1	1	6	0	1	0	0	0	0	0	0	1	0	0	0	0	0	0	0	0	0	0	6
1	25	1	1	0	0	0	0	0			340.459	62300	0	0	1	6	0	1	0	0	0	0	0	0	1	0	0	0	0	0	0	0	0	0	0	6
1	45	1	1	0	0	0	0	0			374.71	8990	0	0	1	6	0	1	0	0	0	0	0	0	1	0	0	0	1	1	0	0	0	0	0	2.56667
1	44	1	1	0	0	0	0	0			75.0106	289000	0	1	1	6	0	1	0	0	0	0	0	0	1	0	0	0	0	0	0	0	0	0	0	6
1	41	1	1	0	0	0	1	0			208.202	62300	0	0	1	6	0	1	0	0	0	0	0	0	1	0	0	0	1	1	0	0	0	0	0	0.933333
1	43	1	1	0	0	0	0	0			185.742	116000	0	1	1	6	0	1	0	0	0	0	0	0	0	1	0	0	1	1	0	0	0	0	0	1.86667
1	44	1	1	0	0	0	0	0			57.6756	7680	0	1	1	6	0	1	0	0	0	0	0	0	1	0	0	0	0	0	0	0	0	0	0	6
1	33	1	1	0	0	0	1	0			106.24	267000	0	1	1	6	0	1	0	0	0	0	0	0	1	0	0	0	0	0	0	0	0	0	0	6
1	31	1	1	0	0	0	0	0			632.394	62500	0	0	0	6	0	1	0	0	0	0	0	0	1	0	0	0	0	0	0	0	0	0	0	6
1	36	1	1	0	0	0	0	0			148.893	48800	0	1	1	6	0	1	0	0	0	0	0	0	1	0	0	0	0	0	0	0	0	0	0	6
1	38	1	1	0	0	0	1	0			11.655	768000	1	1	1	6	0	1	0	0	0	0	0	0	1	0	0	0	1	1	0	0	0	0	0	0.5
1	50	1	1	0	0	0	0	0			393.12	6970	0	0	1	6	0	1	0	0	0	0	0	0	1	0	0	0	0	0	0	0	0	0	0	6
1	32	1	1	0	0	0	0	0			98.9616	76000	0	1	1	6	0	1	0	0	0	0	0	0	0	1	0	0	1	0	0	0	0	0	1	3.96667
1	23	1	1	0	0	0	0	0			393.414	20400	0	0	1	6	0	1	0	0	0	0	0	0	1	0	0	0	0	0	0	0	0	0	0	6
1	25	1	1	0	0	0	0	0			336.134	80800	0	0	1	6	0	1	0	0	0	0	0	0	1	0	0	0	0	0	0	0	0	0	0	6
1	26	1	1	0	0	0	0	0			399.024	78500	0	0	1	6	0	1	0	0	0	0	0	0	1	0	0	0	1	1	0	0	0	0	0	0.3
1	31	1	1	0	0	0	1	0			484.384	46800	0	0	1	6	0	1	0	0	0	0	0	0	1	0	0	0	0	0	0	0	0	0	0	6
1	32	1	1	0	0	0	0	0			461.376	13700	0	0	1	6	0	1	0	0	0	0	0	0	1	0	0	0	1	1	0	0	0	0	0	0.566667
1	38	1	1	0	0	0	0	0			303.62	75000	0	0	1	6	0	1	0	0	0	0	0	0	1	0	0	0	1	1	0	0	0	0	0	0.566667
1	27	1	1	0	0	0	0	0			398.271	146000	0	0	1	6	0	1	0	0	0	0	0	0	1	0	0	0	1	0	1	1	0	0	0	4.23333
1	29	1	1	0	0	0	0	0			286.997	171000	0	0	1	6	0	1	0	0	0	0	0	0	1	0	0	0	0	0	0	0	0	0	0	6
1	30	1	1	0	0	0	0	0			307.751	20400	0	0	1	6	0	1	0	0	0	0	0	0	1	0	0	0	0	0	0	0	0	0	0	6
1	41	1	1	0	0	0	0	0			495.829	40000	0	0	1	6	0	1	0	0	0	0	0	0	1	0	0	0	0	0	0	0	0	0	0	6
1	28	1	1	0	0	0	0	1			309.314	195000	0	0	1	6	0	1	0	0	0	0	0	0	1	0	0	0	1	1	0	0	0	0	0	0.933333
1	29	1	1	0	0	0	0	0			264.403	124000	0	0	1	6	0	1	0	0	0	0	0	0	1	0	0	0	1	1	0	0	0	0	0	5.63333
1	26	1	1	0	0	0	0	0			463.654	35700	0	0	1	6	0	1	0	0	0	0	0	0	1	0	0	0	0	0	0	0	0	0	0	6
1	27	1	1	0	0	0	0	0			282.173	15200	0	0	1	6	0	1	0	0	0	0	0	0	1	0	0	0	1	0	1	1	0	0	0	0.4
1	29	1	1	0	0	0	0	0			318.818	25300	0	0	1	6	0	1	0	0	0	0	0	0	1	0	0	0	1	1	0	0	0	0	0	1.8
1	30	1	1	0	0	0	0	0			83.721	334000	0	1	1	6	0	1	0	0	0	0	0	0	1	0	0	0	1	0	0	0	0	1	0	0.466667
1	35	1	1	0	0	0	0	0			120.715	46900	0	1	1	6	0	1	0	0	0	0	0	0	1	0	0	0	1	1	0	0	0	0	0	2.76667
1	50	0	0	1	0	0	0	0			11.5872	357000	1	1	1	6	0	1	0	0	0	0	0	0	1	0	0	0	0	0	0	0	0	0	0	6
1	21	1	1	0	0	0	0	0			47.554	134000	0	1	1	6	0	1	0	0	0	0	0	0	1	0	0	0	1	1	1	1	0	0	0	3.93333
1	42	1	1	0	0	0	0	0			11.575	342000	1	1	1	6	0	1	0	0	0	0	0	0	1	0	0	0	1	1	0	0	0	0	0	0.166667
1	42	1	1	0	0	0	0	0			323.46	2070000	1	1	1	3.63333	0	1	0	0	0	0	0	0	1	0	0	1	1	1	0	0	0	0	0	0.1
1	21	1	1	0	0	0	0	1			201.6	97700	0	0	1	6	0	1	0	0	0	0	0	0	1	0	0	0	1	1	0	0	0	0	0	3.73333
1	23	1	1	0	0	0	0	0			359.352	38600	0	0	1	6	0	1	0	0	0	0	0	0	1	0	0	0	1	1	0	0	0	0	0	1.16667
1	31	1	1	0	0	0	0	0			361.368	1850000	0	0	1	6	0	1	0	0	0	0	0	0	1	0	0	0	0	0	0	0	0	0	0	6
1	24	1	1	0	0	0	0	0			362.585	28000	0	0	1	6	0	1	0	0	0	0	0	0	1	0	0	0	1	1	0	0	0	0	0	0.466667
1	31	1	1	0	0	0	0	0			824.04	1110000	0	0	0	6	0	1	0	0	0	0	0	0	1	0	0	0	1	1	0	0	0	0	0	1.4
1	32	0	0	1	0	0	0	0			411.232	196000	1	1	1	6	0	1	0	0	0	0	0	0	1	0	0	0	1	1	0	0	0	0	0	3.4
1	27	1	1	0	0	0	0	0			151.877	66800	0	1	1	6	0	1	0	0	0	0	0	0	1	0	0	0	1	1	0	0	0	0	0	1.4
1	36	1	1	0	0	0	0	0			8.541	95600	1	1	1	6	0	1	0	0	0	0	0	0	1	0	0	0	0	0	0	0	0	0	0	6
1	41	1	1	0	0	0	0	0			564.073	87400	0	0	0	6	0	1	0	0	0	0	0	0	1	0	0	0	1	1	0	0	0	0	0	0.433333
1	25	1	1	0	0	0	0	0			251.981	22400	0	0	1	6	0	1	0	0	0	0	0	0	0	1	0	0	1	1	0	0	0	0	0	1.16667
1	37	1	1	0	0	0	0	0			416.882	197000	0	0	1	6	0	1	0	0	0	0	0	0	1	0	0	0	1	1	0	0	0	0	0	0.466667
1	64	0	0	0	0	1	0	0			601.241	21600	0	0	0	6	0	1	0	0	0	0	0	0	1	0	0	0	1	1	0	0	0	0	0	1.7
1	32	1	1	0	0	0	0	0			352.123	50800	0	0	1	6	0	1	0	0	0	0	0	0	1	0	0	0	1	1	0	0	0	0	0	0.966667
1	44	1	0	1	0	0	0	0			229.87	80700	0	0	1	6	0	1	0	0	0	0	0	0	1	0	0	0	0	0	0	0	0	0	0	6
1	42	1	1	0	0	0	0	0			166.571	36200	0	1	1	6	0	1	0	0	0	0	0	0	1	0	0	0	0	0	0	0	0	0	0	6
1	25	1	1	0	0	0	0	0			387.311	98800	0	0	1	3.9	0	1	0	0	0	0	0	0	0	1	0	0	1	0	1	0	1	0	0	3.9
1	47	1	0	1	0	0	0	0			613.48	>10000000	0	0	0	6	0	1	0	0	0	0	0	0	0	1	0	0	1	0	0	0	0	0	1	0.4
1	51	1	1	0	0	0	1	0			61.1436	174000	1	1	1	6	0	1	0	0	0	0	0	0	1	0	0	0	0	0	0	0	0	0	0	6
1	24	1	1	0	0	0	0	0			398.112	22900000	0	0	1	6	0	1	0	0	0	0	0	0	1	0	0	0	0	0	0	0	0	0	0	6
1	41	1	1	0	0	0	0	0			442.742	13300	0	0	1	6	0	1	0	0	0	0	0	0	1	0	0	0	1	1	0	0	0	0	0	0.633333
1	43	1	1	0	0	0	0	0			187.133	114000	0	1	1	6	0	1	0	0	0	0	0	0	1	0	0	0	1	1	0	0	0	0	0	1.16667
1	28	1	1	0	0	0	0	0			296.548	24500	0	0	1	6	0	1	0	0	0	0	0	0	1	0	0	0	0	0	0	0	0	0	0	6
1	28	1	1	0	0	0	0	0			263.282	79100	0	0	1	6	0	1	0	0	0	0	0	0	1	0	0	0	0	0	0	0	0	0	0	6
1	38	1	1	0	0	0	0	0			309.787	38300	0	0	1	6	0	1	0	0	0	0	0	0	1	0	0	0	1	1	0	0	0	0	0	0.666667
1	17	1	1	0	0	0	0	0			640.332	18800	0	0	0	6	0	0	1	0	0	0	0	0	1	0	0	0	0	0	0	0	0	0	0	6
1	52	1	0	1	0	0	0	0			30.888	845000	0	1	1	6	0	0	1	0	0	0	0	0	1	0	0	0	0	0	0	0	0	0	0	6
1	31	1	1	0	0	0	0	0			434.617	58700	0	0	1	6	0	0	1	0	0	0	0	0	1	0	0	0	0	0	0	0	0	0	0	6
1	35	1	1	0	0	0	0	0			208.425	64800	0	0	1	6	0	0	1	0	0	0	0	0	1	0	0	0	0	0	0	0	0	0	0	6
1	38	1	1	0	0	0	0	0			356.819	23300	0	0	1	6	0	0	1	0	0	0	0	0	1	0	0	0	1	1	0	0	0	0	0	0.9
1	33	1	1	0	0	0	0	0			165.139	6380000	1	1	1	6	0	0	1	0	0	0	0	0	1	0	0	0	0	0	0	0	0	0	0	6
1	23	1	1	0	0	0	0	0			40.8672	1190000	1	1	1	6	0	0	1	0	0	0	0	0	1	0	0	0	1	1	0	0	0	0	0	1
1	35	1	1	0	0	0	0	0			383.057	76400	0	0	1	6	0	0	1	0	0	0	0	0	1	0	0	0	0	0	0	0	0	0	0	6
1	48	1	1	0	0	0	0	0			586.88	12700	0	0	0	6	0	0	1	0	0	0	0	0	1	0	0	0	0	0	0	0	0	0	0	6
1	23	1	1	0	0	0	0	0			665.434	35300	0	0	0	6	0	0	1	0	0	0	0	0	1	0	0	0	0	0	0	0	0	0	0	6
1	24	1	1	0	0	0	0	0			334.022	43400	0	0	1	6	0	0	1	0	0	0	0	0	1	0	0	0	0	0	0	0	0	0	0	6
1	31	1	1	0	0	0	0	0			504.3	170000	0	0	0	6	0	0	1	0	0	0	0	0	1	0	0	0	1	1	0	0	0	0	0	0.3
1	23	1	1	0	0	0	0	0			393.94	12300	0	0	1	6	0	0	1	0	0	0	0	0	1	0	0	0	1	1	0	0	0	0	0	0.466667
1	32	1	1	0	0	0	0	0			623.717	59000	0	0	0	6	0	0	1	0	0	0	0	0	1	0	0	0	0	0	0	0	0	0	0	6
1	29	1	1	0	0	0	0	0			41.958	463000	0	1	1	6	0	0	1	0	0	0	0	0	1	0	0	0	0	0	0	0	0	0	0	6
1	33	1	1	0	0	0	0	0			639.014	23000	0	0	0	6	0	0	1	0	0	0	0	0	0	1	0	0	1	1	0	0	0	0	0	0.933333
1	24	1	1	0	0	0	1	0			238.392	80000	0	0	1	6	0	0	1	0	0	0	0	0	1	0	0	0	1	1	0	0	0	0	0	2.73333
1	22	1	1	0	0	0	0	0			270.135	353000	0	0	1	6	0	0	1	0	0	0	0	0	1	0	0	0	0	0	0	0	0	0	0	6
1	22	1	1	0	0	0	0	0			329.472	59400	0	0	1	6	0	0	1	0	0	0	0	0	1	0	0	0	0	0	0	0	0	0	0	6
1	23	1	1	0	0	0	0	0			592.763	22300	0	0	0	6	0	0	1	0	0	0	0	0	1	0	0	0	0	0	0	0	0	0	0	6
1	30	1	1	0	0	0	0	0			391.272	44600	0	0	1	6	0	0	1	0	0	0	0	0	1	0	0	0	0	0	0	0	0	0	0	6
1	39	1	1	0	0	0	0	0			258.21	17700	0	0	1	6	0	0	1	0	0	0	0	0	1	0	0	0	0	0	0	0	0	0	0	6
1	24	1	1	0	0	0	0	0			91.8148	138000	0	1	1	6	0	0	1	0	0	0	0	0	1	0	0	0	1	0	1	1	0	0	0	5.8
1	24	1	1	0	0	0	0	0			33.9295	303000	0	1	1	6	0	0	1	0	0	0	0	0	1	0	0	0	0	0	0	0	0	0	0	6
1	24	1	1	0	0	0	0	0			2.166	208000	1	1	1	6	0	0	1	0	0	0	0	0	1	0	0	0	1	1	0	0	0	0	0	0.466667
1	37	1	1	0	0	0	0	0			33.7876	295000	0	1	1	6	0	0	1	0	0	0	0	0	1	0	0	0	1	0	0	0	0	0	1	0.366667
1	29	1	1	0	0	0	1	0			127.4	127000	0	1	1	6	0	0	1	0	0	0	0	0	1	0	0	0	0	0	0	0	0	0	0	6
1	29	1	1	0	0	0	0	0			338.224	268000	0	0	1	6	0	0	1	0	0	0	0	0	1	0	0	0	1	1	0	0	0	0	0	0.466667
1	36	0	0	0	1	0	0	1			211.584	261000	0	0	1	4.43333	0	0	1	0	0	0	0	0	1	0	0	0	1	1	0	0	0	0	0	0.7
1	48	1	0	0	1	0	1	1			177.887	17500	0	1	1	6	0	0	1	0	0	0	0	0	1	0	0	0	0	0	0	0	0	0	0	6
1	31	1	1	0	0	0	0	0			677.736	143000	0	0	0	6	0	0	1	0	0	0	0	0	1	0	0	0	1	1	0	0	0	0	0	0.233333
1	22	1	1	0	0	0	0	0			265.095	313000	0	0	1	6	0	0	1	0	0	0	0	0	1	0	0	0	0	0	0	0	0	0	0	6
1	42	1	1	0	0	0	0	0			423.225	23700	0	0	1	6	0	0	1	0	0	0	0	0	1	0	0	0	0	0	0	0	0	0	0	6
1	25	1	1	0	0	0	0	0			329.386	790000	0	0	1	6	0	0	1	0	0	0	0	0	1	0	0	0	0	0	0	0	0	0	0	6
1	32	1	1	0	0	0	0	0			176.088	17600	0	1	1	6	0	0	1	0	0	0	0	0	1	0	0	0	0	0	0	0	0	0	0	6
1	35	1	0	0	1	0	0	0			464.35	4820	0	0	1	6	0	0	1	0	0	0	0	0	1	0	0	0	1	1	0	0	0	0	0	1.4
1	36	1	1	0	0	0	0	0			30.0328	388000	0	1	1	6	0	0	1	0	0	0	0	0	1	0	0	0	1	0	1	1	0	0	0	1
1	26	1	1	0	0	0	0	0			289.639	56700	0	0	1	6	0	0	1	0	0	0	0	0	1	0	0	0	0	0	0	0	0	0	0	6
1	24	1	1	0	0	0	0	0			299.754	66200	0	0	1	6	0	0	1	0	0	0	0	0	1	0	0	0	0	0	0	0	0	0	0	6
1	32	1	0	0	1	0	0	0			615.139	80400	0	0	0	6	0	0	1	0	0	0	0	0	1	0	0	0	1	1	0	0	0	0	0	0.333333
1	31	1	1	0	0	0	0	0			294.153	179000	0	0	1	6	0	0	1	0	0	0	0	0	1	0	0	0	0	0	0	0	0	0	0	6
1	27	1	1	0	0	0	0	0			201.267	164000	0	0	1	6	0	0	1	0	0	0	0	0	1	0	0	0	0	0	0	0	0	0	0	6
1	29	1	1	0	0	0	0	0			235.326	76600	0	0	1	6	0	0	1	0	0	0	0	0	1	0	0	0	0	0	0	0	0	0	0	6
1	43	1	0	1	0	0	0	0			40.2318	190000	1	1	1	6	0	0	1	0	0	0	0	0	0	1	0	0	0	0	0	0	0	0	0	6
1	40	1	0	1	0	0	0	0			54.6539	367000	1	1	1	6	0	0	1	0	0	0	0	0	1	0	0	0	1	1	0	0	0	0	0	0.3
1	22	1	1	0	0	0	0	0			15.4808	1340000	1	1	1	6	0	0	1	0	0	0	0	0	1	0	0	0	1	1	0	0	0	0	0	0.3
1	50	1	1	0	0	0	0	0			14.608	1990000	1	1	1	6	0	0	1	0	0	0	0	0	1	0	0	0	0	0	0	0	0	0	0	6
1	33	0	0	1	0	0	0	0			192.326	7750	0	1	1	6	0	0	1	0	0	0	0	0	0	1	0	0	1	0	0	0	0	0	1	1.4
1	24	1	1	0	0	0	0	0			341.653	70000	0	0	1	6	0	0	1	0	0	0	0	0	1	0	0	0	1	1	0	0	0	0	0	1.16667
1	30	1	1	0	0	0	0	0			286.11	8090	0	0	1	6	0	0	1	0	0	0	0	0	1	0	0	0	1	1	0	0	0	0	0	0.7
1	40	1	1	0	0	0	0	0			194.296	17300	0	1	1	6	0	0	1	0	0	0	0	0	1	0	0	0	1	1	0	0	0	0	0	1.4
1	21	1	1	0	0	0	0	0			374.652	3660	0	0	1	6	0	0	1	0	0	0	0	0	1	0	0	0	0	0	0	0	0	0	0	6
1	28	1	1	0	0	0	0	0			146.88	395000	0	1	1	6	0	0	1	0	0	0	0	0	1	0	0	0	0	0	0	0	0	0	0	6
1	23	1	0	1	0	0	0	0			131.712	29500	0	1	1	6	0	0	1	0	0	0	0	0	1	0	0	0	1	1	0	0	0	0	0	3.5
1	26	1	1	0	0	0	0	0			288.832	13800	0	0	1	6	0	0	1	0	0	0	0	0	1	0	0	0	0	0	0	0	0	0	0	6
1	19	1	1	0	0	0	0	0			371.956	43500	0	0	1	6	0	0	1	0	0	0	0	0	1	0	0	0	1	1	0	0	0	0	0	0.466667
1	25	1	1	0	0	0	0	0			193.545	422000	0	1	1	6	0	0	1	0	0	0	0	0	1	0	0	0	1	0	1	1	0	0	0	3.03333
1	35	1	1	0	0	0	0	0			204.553	13700	0	0	1	6	0	0	1	0	0	0	0	0	1	0	0	0	0	0	0	0	0	0	0	6
1	29	1	1	0	0	0	0	0			484.029	7630	0	0	1	6	0	0	1	0	0	0	0	0	1	0	0	0	1	1	0	0	0	0	0	0.3
1	23	1	1	0	0	0	0	0			385.294	1440000	0	0	1	6	0	0	1	0	0	0	0	0	1	0	0	0	1	0	1	1	0	0	0	0.933333
1	49	1	1	0	0	0	0	0			35.1102	43500	1	1	1	6	0	0	1	0	0	0	0	0	1	0	0	0	0	0	0	0	0	0	0	6
1	42	1	1	0	0	0	0	0			37.03	714000	0	1	1	6	0	0	1	0	0	0	0	0	1	0	0	0	1	1	0	0	0	0	0	0.466667
1	23	1	1	0	0	0	0	0			474.077	25000	0	0	1	6	0	0	1	0	0	0	0	0	0	1	0	0	1	1	0	0	0	0	0	0.466667
1	20	1	1	0	0	0	0	1			484.055	17700	1	1	1	6	0	0	1	0	0	0	0	0	1	0	0	0	1	1	0	0	0	0	0	0.3
1	18	1	1	0	0	0	0	0			97.232	429000	0	1	1	6	0	0	1	0	0	0	0	0	1	0	0	0	0	0	0	0	0	0	0	6
1	34	1	1	0	0	0	1	0			6.056	51900	1	1	1	6	0	0	1	0	0	0	0	0	1	0	0	0	0	0	0	0	0	0	0	6
1	39	0	0	1	0	0	0	0			443.855	10300	0	0	1	6	0	0	1	0	0	0	0	0	0	0	1	0	0	0	0	0	0	0	0	6
1	26	1	1	0	0	0	0	0			287.812	58900	0	0	1	6	0	0	1	0	0	0	0	0	0	1	0	0	0	0	0	0	0	0	0	6
1	49	1	1	0	0	0	1	0			94.094	139000	0	1	1	6	0	0	1	0	0	0	0	0	0	1	0	0	0	0	0	0	0	0	0	6
1	31	1	1	0	0	0	0	0			42.5565	135000	1	1	1	6	0	0	1	0	0	0	0	0	0	1	0	0	1	1	0	0	0	0	0	0.4
1	37	1	1	0	0	0	0	0			0	873000	1	1	1	6	0	0	1	0	0	0	0	0	1	0	0	0	0	0	0	0	0	0	0	6
1	30	1	1	0	0	0	0	0			17.1306	581000	1	1	1	6	0	0	1	0	0	0	0	0	1	0	0	0	1	1	0	0	0	0	0	0.366667
1	22	1	1	0	0	0	0	0			269.04	9160000	0	0	1	6	0	0	1	0	0	0	0	0	1	0	0	0	1	1	0	0	0	0	0	0.466667
1	39	1	1	0	0	0	0	0			521.283	39100	0	0	0	6	0	0	1	0	0	0	0	0	1	0	0	0	1	1	0	0	0	0	0	0.333333
1	40	1	1	0	0	0	0	0			10.472	2830000	1	1	1	6	0	0	1	0	0	0	0	0	1	0	0	0	1	1	0	0	0	0	0	0.466667
1	32	1	1	0	0	0	0	0			258.539	93100	0	0	1	6	0	0	1	0	0	0	0	0	1	0	0	0	0	0	0	0	0	0	0	6
1	27	1	1	0	0	0	0	0			235.224	8670	0	0	1	6	0	0	1	0	0	0	0	0	1	0	0	0	1	1	0	0	0	0	0	0.466667
1	31	1	1	0	0	0	0	0			36.6	>10000000	1	1	1	6	0	0	1	0	0	0	0	0	1	0	0	0	1	0	1	1	0	0	0	3.96667
1	24	1	1	0	0	0	0	0			295.61	77200	0	0	1	6	0	0	1	0	0	0	0	0	1	0	0	0	1	1	0	0	0	0	0	0.466667
1	30	1	0	1	0	0	1	0			146.454	8290	0	1	1	6	0	0	1	0	0	0	0	0	1	0	0	0	1	1	0	0	0	0	0	2.33333
1	43	1	0	1	0	0	0	0			240.332	90700	0	0	1	6	0	0	1	0	0	0	0	0	0	1	0	0	0	0	0	0	0	0	0	6
1	25	1	1	0	0	0	0	0			432.638	175000	0	0	1	6	0	0	1	0	0	0	0	0	1	0	0	0	1	1	0	0	0	0	0	0.633333
1	50	1	1	0	0	0	0	0			0	141000	1	1	1	1.26667	0	0	1	0	0	0	0	0	0	1	0	1	0	0	0	0	0	0	0	1.3
1	26	1	1	0	0	0	0	0			239.803	31510	0	0	1	6	0	0	1	0	0	0	0	0	1	0	0	0	1	1	0	0	0	0	0	0.566667
1	49	1	1	0	0	0	0	0			498.96	158000	0	0	1	6	0	0	1	0	0	0	0	0	1	0	0	0	0	0	0	0	0	0	0	6
1	39	1	1	0	0	0	0	0			303.685	32400	0	0	1	6	0	0	1	0	0	0	0	0	1	0	0	0	0	0	0	0	0	0	0	6
1	37	1	1	0	0	0	0	0			532.688	58800	0	0	0	6	0	0	1	0	0	0	0	0	1	0	0	0	1	1	0	0	0	0	0	0.4
1	31	1	1	0	0	0	0	0			369.293	18500	0	0	1	6	0	0	1	0	0	0	0	0	1	0	0	0	1	1	0	0	0	0	0	1.13333
1	30	1	1	0	0	0	0	0			287.247	17600	0	0	1	6	0	0	1	0	0	0	0	0	1	0	0	0	1	1	0	0	0	0	0	1.26667
1	30	1	1	0	0	0	0	0			354.632	124000	0	0	1	6	0	0	1	0	0	0	0	0	1	0	0	0	0	0	0	0	0	0	0	6
1	30	1	1	0	0	0	1	0			482.315	20300	0	0	1	6	0	0	1	0	0	0	0	0	1	0	0	0	0	0	0	0	0	0	0	6
1	31	1	1	0	0	0	0	0			312.741	109000	0	0	1	6	0	0	1	0	0	0	0	0	1	0	0	0	0	0	0	0	0	0	0	6
1	40	1	0	0	1	0	1	1			56.5516	343000	0	1	1	6	0	0	1	0	0	0	0	0	0	1	0	0	1	0	0	0	0	0	1	0.666667
1	26	1	1	0	0	0	0	0			337.99	32200	0	0	1	6	0	0	1	0	0	0	0	0	1	0	0	0	0	0	0	0	0	0	0	6
1	20	1	1	0	0	0	0	0			339.788	50400	0	0	1	6	0	0	1	0	0	0	0	0	1	0	0	0	1	1	0	0	0	0	0	0.866667
1	28	1	1	0	0	0	0	0			302.182	13000	0	0	1	6	0	0	1	0	0	0	0	0	1	0	0	0	0	0	0	0	0	0	0	6
1	23	1	1	0	0	0	0	0			387.49	19500	0	0	1	6	0	0	1	0	0	0	0	0	1	0	0	0	0	0	0	0	0	0	0	6
1	24	1	1	0	0	0	0	0			336.134	104000	0	0	1	6	0	0	1	0	0	0	0	0	1	0	0	0	0	0	0	0	0	0	0	6
1	32	1	1	0	0	0	0	0			96.192	3700000	1	1	1	6	0	0	1	0	0	0	0	0	1	0	0	0	1	1	0	0	0	0	0	0.533333
1	25	1	1	0	0	0	0	0			307.32	253000	0	0	1	6	0	0	1	0	0	0	0	0	1	0	0	0	0	0	0	0	0	0	0	6
1	29	1	1	0	0	0	0	0			302.308	35500	0	0	1	6	0	0	1	0	0	0	0	0	1	0	0	0	1	0	1	1	0	0	0	0.533333
1	30	1	1	0	0	0	0	0			331.238	13000	0	0	1	6	0	0	1	0	0	0	0	0	1	0	0	0	1	1	0	0	0	0	0	0.933333
1	37	1	1	0	0	0	0	0			549.001	17000	0	0	0	6	0	0	1	0	0	0	0	0	0	1	0	0	1	1	0	0	0	0	0	0.466667
1	32	1	1	0	0	0	1	0			276.168	6290	0	0	1	6	0	0	1	0	0	0	0	0	1	0	0	0	1	0	1	1	0	0	0	0.7
1	30	1	1	0	0	0	0	0			56.52	86400	0	1	1	6	0	0	1	0	0	0	0	0	1	0	0	0	0	0	0	0	0	0	0	6
1	31	1	1	0	0	0	0	0			213.408	37500	0	0	1	6	0	0	1	0	0	0	0	0	1	0	0	0	0	0	0	0	0	0	0	6
1	28	1	1	0	0	0	0	0			594.093	10900	0	0	0	6	0	0	1	0	0	0	0	0	1	0	0	0	1	1	0	0	0	0	0	0.466667
1	41	1	0	1	0	0	1	0			27.742	152000	1	1	1	6	0	0	1	0	0	0	0	0	1	0	0	0	0	0	0	0	0	0	0	6
1	23	1	1	0	0	0	0	0			237.857	25200	0	0	1	6	0	0	1	0	0	0	0	0	1	0	0	0	0	0	0	0	0	0	0	6
1	31	1	1	0	0	0	0	0			252.014	144000	0	0	1	6	0	0	1	0	0	0	0	0	1	0	0	0	1	1	0	0	0	0	0	0.433333
1	43	1	1	0	0	0	0	0			724.896	173000	0	0	0	6	0	0	1	0	0	0	0	0	1	0	0	0	0	0	0	0	0	0	0	6
1	31	1	1	0	0	0	0	0			759.948	7750	0	0	0	6	0	0	1	0	0	0	0	0	1	0	0	0	1	1	0	0	0	0	0	0.333333
1	42	1	0	0	1	0	0	1			375.829	40200	0	0	1	6	0	0	1	0	0	0	0	0	1	0	0	0	0	0	0	0	0	0	0	6
1	24	1	1	0	0	0	0	0			353.717	42400	0	0	1	6	0	0	1	0	0	0	0	0	1	0	0	0	1	1	0	0	0	0	0	0.866667
1	22	1	1	0	0	0	0	0			244.675	452000	0	0	1	6	0	0	1	0	0	0	0	0	1	0	0	0	1	1	0	0	0	0	0	0.466667
1	27	1	1	0	0	0	0	0			485.723	28800	0	0	1	6	0	0	1	0	0	0	0	0	1	0	0	0	0	0	0	0	0	0	0	6
1	28	1	1	0	0	0	0	0			222.277	98500	0	0	1	6	0	0	1	0	0	0	0	0	1	0	0	0	0	0	0	0	0	0	0	6
1	50	1	0	1	0	0	0	0			27.648	216000	1	1	1	4.06667	0	0	1	0	0	0	0	0	1	0	0	1	1	1	0	0	0	0	0	0.766667
1	29	1	1	0	0	0	0	0			24.276	191000	0	1	1	6	0	0	1	0	0	0	0	0	1	0	0	0	0	0	0	0	0	0	0	6
1	30	1	1	0	0	0	0	0			413.095	34200	0	0	1	6	0	0	1	0	0	0	0	0	1	0	0	0	0	0	0	0	0	0	0	6
1	21	1	1	0	0	0	0	0			449.956	70200	0	0	1	6	0	0	1	0	0	0	0	0	1	0	0	0	0	0	0	0	0	0	0	6
1	28	1	1	0	0	0	0	0			174.174	16300	0	1	1	6	0	0	1	0	0	0	0	0	1	0	0	0	0	0	0	0	0	0	0	6
1	40	1	1	0	0	0	0	0			363.968	14500	1	1	1	6	0	0	1	0	0	0	0	0	1	0	0	0	1	1	0	0	0	0	0	5.6
1	22	1	1	0	0	0	0	0			343.824	104000	0	0	1	6	0	0	1	0	0	0	0	0	1	0	0	0	0	0	0	0	0	0	0	6
1	47	1	1	0	0	0	0	0			38.728	443000	1	1	1	6	0	0	1	0	0	0	0	0	1	0	0	0	1	0	1	1	0	0	0	0.933333
1	37	1	1	0	0	0	1	0			603.141	60600	0	0	0	6	0	0	1	0	0	0	0	0	1	0	0	0	0	0	0	0	0	0	0	6
1	22	1	1	0	0	0	0	0			503.88	20400	0	0	0	6	0	0	1	0	0	0	0	0	1	0	0	0	1	0	1	1	0	0	0	1.86667
1	34	1	1	0	0	0	0	0			444.036	23200	0	0	1	6	0	0	1	0	0	0	0	0	1	0	0	0	1	1	0	0	0	0	0	0.7
1	34	1	1	0	0	0	0	0			223.726	26000	0	0	1	6	0	0	1	0	0	0	0	0	1	0	0	0	0	0	0	0	0	0	0	6
1	48	1	1	0	0	0	1	0			19.1835	781000	0	1	1	6	0	0	1	0	0	0	0	0	1	0	0	0	0	0	0	0	0	0	0	6
1	28	1	1	0	0	0	1	0			374.88	30200	0	0	1	6	0	0	1	0	0	0	0	0	1	0	0	0	1	1	0	0	0	0	0	0.466667
1	23	1	1	0	0	0	0	0			338.113	46400	0	0	1	1.9	0	0	1	0	0	0	0	0	1	0	0	0	1	1	0	0	0	0	0	0.433333
1	27	1	1	0	0	0	0	0			229.295	70000	0	0	1	6	0	0	1	0	0	0	0	0	1	0	0	0	1	1	0	0	0	0	0	0.466667
1	28	1	1	0	0	0	0	0			391.952	30800	0	0	1	6	0	0	1	0	0	0	0	0	1	0	0	0	0	0	0	0	0	0	0	6
1	31	1	1	0	0	0	0	0			346.979	8490	0	0	1	6	0	0	1	0	0	0	0	0	1	0	0	0	0	0	0	0	0	0	0	6
1	20	1	1	0	0	0	0	0			294.276	280000	0	0	1	6	0	0	1	0	0	0	0	0	1	0	0	0	1	0	1	1	0	0	0	1.36667
1	36	1	1	0	0	0	0	0			260.013	160000	0	0	1	6	0	0	1	0	0	0	0	0	1	0	0	0	1	1	0	0	0	0	0	5.36667
1	18	1	1	0	0	0	0	0			257.466	240000	0	0	1	1.03333	0	0	1	0	0	0	0	0	1	0	0	0	1	0	1	0	1	0	0	1
1	32	1	1	0	0	0	0	0			105.12	1400000	0	1	1	6	0	0	1	0	0	0	0	0	1	0	0	0	0	0	0	0	0	0	0	6
1	23	1	0	1	0	0	0	0			63.986	547000	0	1	1	6	0	0	1	0	0	0	0	0	1	0	0	0	0	0	0	0	0	0	0	6
1	23	1	1	0	0	0	0	0			235.368	502000	0	0	1	6	0	0	1	0	0	0	0	0	1	0	0	0	1	0	1	1	0	0	0	4.2
1	30	1	1	0	0	0	0	0			161.305	20500	0	1	1	6	0	0	1	0	0	0	0	0	1	0	0	0	0	0	0	0	0	0	0	6
1	60	1	0	1	0	0	1	0			97.9272	432000	0	1	1	6	0	0	1	0	0	0	0	0	1	0	0	0	0	0	0	0	0	0	0	6
1	33	1	1	0	0	0	0	0			257.825	28000	0	0	1	6	0	0	1	0	0	0	0	0	1	0	0	0	1	1	0	0	0	0	0	1.16667
1	18	1	1	0	0	0	0	0			281.797	158000	0	0	1	2.8	0	0	1	0	0	0	0	0	1	0	0	0	1	1	0	0	0	0	0	0.466667
1	28	1	1	0	0	0	0	0			292.266	9840	0	0	1	6	0	0	1	0	0	0	0	0	1	0	0	0	0	0	0	0	0	0	0	6
1	19	1	1	0	0	0	0	0			278.432	187000	0	0	1	6	0	0	1	0	0	0	0	0	1	0	0	0	1	1	0	0	0	0	0	1.16667
1	28	1	1	0	0	0	0	0			208.447	84900	0	0	1	6	0	0	1	0	0	0	0	0	1	0	0	0	0	0	0	0	0	0	0	6
1	27	1	1	0	0	0	0	0			270.635	151000	0	0	1	6	0	0	0	1	0	0	0	0	1	0	0	0	1	1	0	0	0	0	0	0.4
1	29	1	1	0	0	0	0	0			341.955	58000	0	0	1	6	0	0	0	1	0	0	0	0	1	0	0	0	0	0	0	0	0	0	0	6
1	27	1	1	0	0	0	0	0			258.944	286000	0	0	1	6	0	0	0	1	0	0	0	0	1	0	0	0	0	0	0	0	0	0	0	6
1	24	1	1	0	0	0	0	0			156.713	45700	0	1	1	6	0	0	0	1	0	0	0	0	1	0	0	0	0	0	0	0	0	0	0	6
1	66	1	0	1	0	0	0	0			3.484	2290	1	1	1	2.43333	0	0	0	1	0	0	0	0	1	0	0	1	1	1	0	0	0	0	0	0.466667
1	26	1	1	0	0	0	0	0			473.622	97900	0	0	1	6	0	0	0	1	0	0	0	0	1	0	0	0	1	1	0	0	0	0	0	4.43333
1	31	1	1	0	0	0	1	0			385.664	160000	0	0	1	6	0	0	0	1	0	0	0	0	1	0	0	0	0	0	0	0	0	0	0	6
1	29	1	1	0	0	0	0	0			218.131	65100	0	0	1	6	0	0	0	1	0	0	0	0	1	0	0	0	0	0	0	0	0	0	0	6
1	28	1	1	0	0	0	1	0			693.396	98800	0	0	0	6	0	0	0	1	0	0	0	0	1	0	0	0	1	1	0	0	0	0	0	2.2
1	30	1	1	0	0	0	0	0			46.458	186000	1	1	1	6	0	0	0	1	0	0	0	0	1	0	0	0	1	0	1	1	0	0	0	1.16667
1	23	1	1	0	0	0	0	0			230.496	1180000	0	0	1	6	0	0	0	1	0	0	0	0	1	0	0	0	0	0	0	0	0	0	0	6
1	24	1	1	0	0	0	0	0			862.27	76700	0	0	0	2.06667	0	0	0	1	0	0	0	0	1	0	0	1	0	0	0	0	0	0	0	6
1	42	1	1	0	0	0	0	0			256.757	382000	0	0	1	6	0	0	0	1	0	0	0	0	1	0	0	0	1	0	1	1	0	0	0	1.16667
1	25	1	1	0	0	0	0	0			135.744	3520000	0	1	1	6	0	0	0	1	0	0	0	0	1	0	0	0	1	0	1	1	0	0	0	4.26667
1	47	1	1	0	0	0	0	0			93.24	159000	0	1	1	6	0	0	0	1	0	0	0	0	1	0	0	0	1	1	0	0	0	0	0	3.73333
1	33	1	1	0	0	0	0	0			370.051	27500	0	0	1	6	0	0	0	1	0	0	0	0	0	1	0	0	0	0	0	0	0	0	0	6
1	39	1	1	0	0	0	0	0			269.591	21900	0	0	1	6	0	0	0	1	0	0	0	0	1	0	0	0	1	1	0	0	0	0	0	0.466667
1	47	1	1	0	0	0	1	1			427.97	3840	0	0	1	6	0	0	0	1	0	0	0	0	1	0	0	0	0	0	0	0	0	0	0	6
1	20	1	1	0	0	0	0	0			378.809	107000	0	0	1	6	0	0	0	1	0	0	0	0	1	0	0	0	0	0	0	0	0	0	0	6
1	30	1	1	0	0	0	0	0			296.102	130000	0	0	1	6	0	0	0	1	0	0	0	0	1	0	0	0	0	0	0	0	0	0	0	6
1	41	1	1	0	0	0	0	0			147.961	19400	0	1	1	6	0	0	0	1	0	0	0	0	1	0	0	0	0	0	0	0	0	0	0	6
1	21	1	1	0	0	0	0	0			31.6824	877000	1	1	1	6	0	0	0	1	0	0	0	0	1	0	0	0	1	0	1	1	0	0	0	2.63333
1	33	1	1	0	0	0	0	0			395.031	60200	0	0	1	6	0	0	0	1	0	0	0	0	1	0	0	0	1	1	0	0	0	0	0	0.466667
1	54	1	0	1	0	0	1	0			11.904	1990000	1	1	1	6	0	0	0	1	0	0	0	0	1	0	0	0	0	0	0	0	0	0	0	6
1	49	1	1	0	0	0	0	0			87.6204	50200	0	1	1	6	0	0	0	1	0	0	0	0	1	0	0	0	0	0	0	0	0	0	0	6
1	48	1	1	0	0	0	0	0			251.808	43600	0	0	1	6	0	0	0	1	0	0	0	0	1	0	0	0	1	1	0	0	0	0	0	0.466667
1	28	1	1	0	0	0	0	0			496.064	19300	0	0	1	6	0	0	0	1	0	0	0	0	1	0	0	0	0	0	0	0	0	0	0	6
1	30	1	1	0	0	0	0	1			397.563	136000	0	0	1	6	0	0	0	1	0	0	0	0	1	0	0	0	1	1	0	0	0	0	0	5.06667
1	29	1	1	0	0	0	0	0			371.404	9190	0	0	1	6	0	0	0	1	0	0	0	0	1	0	0	0	0	0	0	0	0	0	0	6
1	31	1	1	0	0	0	1	0			448.484	19900	0	0	1	6	0	0	0	1	0	0	0	0	1	0	0	0	0	0	0	0	0	0	0	6
1	31	1	1	0	0	0	0	0			347.116	12100	0	0	1	6	0	0	0	1	0	0	0	0	1	0	0	0	1	1	0	0	0	0	0	1.8
1	24	1	1	0	0	0	0	0			444.941	12100	0	0	1	6	0	0	0	1	0	0	0	0	1	0	0	0	1	1	0	0	0	0	0	0.4
1	32	1	1	0	0	0	0	0			146.932	27200	0	1	1	6	0	0	0	1	0	0	0	0	1	0	0	0	0	0	0	0	0	0	0	6
1	30	1	1	0	0	0	0	0			382.022	51200	0	0	1	6	0	0	0	1	0	0	0	0	1	0	0	0	0	0	0	0	0	0	0	6
1	26	1	1	0	0	0	0	0			570.6	9610	0	0	0	6	0	0	0	1	0	0	0	0	1	0	0	0	0	0	0	0	0	0	0	6
1	23	1	1	0	0	0	0	0			437.409	55500	0	0	1	6	0	0	0	1	0	0	0	0	1	0	0	0	0	0	0	0	0	0	0	6
1	22	1	1	0	0	0	0	0			355.755	103000	0	0	1	6	0	0	0	1	0	0	0	0	1	0	0	0	0	0	0	0	0	0	0	6
1	41	1	1	0	0	0	0	0			415.864	47800	0	0	1	6	0	0	0	1	0	0	0	0	1	0	0	0	1	1	0	0	0	0	0	0.466667
1	28	1	1	0	0	0	0	0			299.866	48700	0	0	1	6	0	0	0	1	0	0	0	0	1	0	0	0	1	1	0	0	0	0	0	1.16667
1	37	1	1	0	0	0	0	0			49.6944	211000	0	1	1	6	0	0	0	1	0	0	0	0	1	0	0	0	1	1	0	0	0	0	0	0.333333
1	24	1	1	0	0	0	0	0			286.578	125000	0	0	1	6	0	0	0	1	0	0	0	0	0	0	1	0	0	0	0	0	0	0	0	6
1	52	1	0	0	1	0	0	1			148.176	80700	0	1	1	6	0	0	0	1	0	0	0	0	1	0	0	0	1	1	0	0	0	0	0	0.0666667
1	34	1	1	0	0	0	0	0			192.197	1690000	0	1	1	6	0	0	0	1	0	0	0	0	1	0	0	0	1	1	0	0	0	0	0	0.5
1	24	1	1	0	0	0	0	0			208.06	27800	0	0	1	6	0	0	0	1	0	0	0	0	1	0	0	0	1	1	0	0	0	0	0	3.03333
1	33	1	1	0	0	0	0	0			10.26	88900	0	1	1	6	0	0	0	1	0	0	0	0	1	0	0	0	0	0	0	0	0	0	0	6
1	32	0	0	1	0	0	0	1			348.248	47400	0	0	1	6	0	0	0	1	0	0	0	0	0	1	0	0	0	0	0	0	0	0	0	6
1	33	1	1	0	0	0	1	0			469.898	42100	0	0	1	6	0	0	0	1	0	0	0	0	1	0	0	0	0	0	0	0	0	0	0	6
1	27	1	1	0	0	0	0	0			370.558	5200	0	0	1	1.23333	0	0	0	1	0	0	0	0	1	0	0	0	1	0	1	0	1	0	0	1.2
1	34	1	1	0	0	0	0	1			262.918	16200	0	0	1	6	0	0	0	1	0	0	0	0	1	0	0	0	0	0	0	0	0	0	0	6
1	37	1	1	0	0	0	0	1			392.518	28700	0	0	1	6	0	0	0	1	0	0	0	0	1	0	0	0	0	0	0	0	0	0	0	6
1	31	1	1	0	0	0	0	0			88.992	87200	1	1	1	6	0	0	0	1	0	0	0	0	1	0	0	0	1	1	0	0	0	0	0	0.466667
1	31	1	1	0	0	0	0	0			70.122	168000	1	1	1	6	0	0	0	1	0	0	0	0	1	0	0	0	1	0	1	1	0	0	0	3.73333
1	20	1	1	0	0	0	0	0			765.461	4270	0	0	0	6	0	0	0	1	0	0	0	0	1	0	0	0	0	0	0	0	0	0	0	6
1	31	1	1	0	0	0	0	0			415.701	32600	0	0	1	4.9	0	0	0	1	0	0	0	0	1	0	0	0	1	0	1	0	1	0	0	4.9
1	24	1	1	0	0	0	0	0			364.008	37900	0	0	1	6	0	0	0	1	0	0	0	0	1	0	0	0	1	1	0	0	0	0	0	0.433333
1	38	1	1	0	0	0	0	0			21.696	442000	0	1	1	0.266667	0	0	0	1	0	0	0	0	1	0	0	1	1	1	0	0	0	0	0	0.166667
1	37	1	1	0	0	0	0	0			4.6879	164000	1	1	1	6	0	0	0	1	0	0	0	0	1	0	0	0	0	0	0	0	0	0	0	6
1	29	1	1	0	0	0	0	0			878.033	12500	0	0	0	6	0	0	0	1	0	0	0	0	1	0	0	0	1	1	0	0	0	0	0	0.366667
1	50	1	1	0	0	0	1	0			531.134	13900	0	0	0	6	0	0	0	1	0	0	0	0	1	0	0	0	0	0	0	0	0	0	0	6
1	32	1	1	0	0	0	0	0			463.339	25700	0	0	1	6	0	0	0	1	0	0	0	0	1	0	0	0	0	0	0	0	0	0	0	6
1	28	1	1	0	0	0	0	0			439.635	69500	0	0	1	6	0	0	0	1	0	0	0	0	1	0	0	0	1	1	0	0	0	0	0	0.3
1	28	1	1	0	0	0	0	0			159.694	410000	0	1	1	6	0	0	0	1	0	0	0	0	1	0	0	0	1	1	0	0	0	0	0	0.466667
1	23	1	1	0	0	0	0	0			466.142	38500	0	0	1	6	0	0	0	1	0	0	0	0	1	0	0	0	0	0	0	0	0	0	0	6
1	55	1	1	0	0	0	0	0			83.0502	57600	0	1	1	6	0	0	0	1	0	0	0	0	1	0	0	0	1	1	0	0	0	0	0	1.9
1	30	1	1	0	0	0	0	0			319.154	39300	0	0	1	6	0	0	0	1	0	0	0	0	1	0	0	0	0	0	0	0	0	0	0	6
1	28	1	1	0	0	0	0	0			285.355	53100	0	0	1	6	0	0	0	1	0	0	0	0	1	0	0	0	0	0	0	0	0	0	0	6
1	30	1	1	0	0	0	0	0			331.932	106000	0	0	1	6	0	0	0	1	0	0	0	0	1	0	0	0	1	1	0	0	0	0	0	0.566667
1	26	1	1	0	0	0	0	0			366.016	12400	0	0	1	6	0	0	0	1	0	0	0	0	1	0	0	0	0	0	0	0	0	0	0	6
1	24	1	1	0	0	0	0	0			421.17	9010	0	0	1	6	0	0	0	1	0	0	0	0	1	0	0	0	0	0	0	0	0	0	0	6
1	30	1	1	0	0	0	0	0			438.423	195000	0	0	1	6	0	0	0	1	0	0	0	0	1	0	0	0	0	0	0	0	0	0	0	6
1	29	1	1	0	0	0	0	0			207.747	6270	0	0	1	6	0	0	0	1	0	0	0	0	1	0	0	0	0	0	0	0	0	0	0	6
1	32	0	0	1	0	0	0	0			381.248	3680	0	0	1	6	0	0	0	1	0	0	0	0	0	1	0	0	1	1	0	0	0	0	0	0.466667
1	27	1	1	0	0	0	0	0			313.27	22200	0	0	1	6	0	0	0	1	0	0	0	0	1	0	0	0	0	0	0	0	0	0	0	6
1	34	1	1	0	0	0	0	0			307.874	180000	0	0	1	6	0	0	0	1	0	0	0	0	1	0	0	0	0	0	0	0	0	0	0	6
1	27	1	1	0	0	0	0	1			76.2816	39400	0	1	1	6	0	0	0	1	0	0	0	0	1	0	0	0	1	0	1	1	0	0	0	1.36667
1	46	1	1	0	0	0	0	0			315.468	13200	0	0	1	6	0	0	0	1	0	0	0	0	1	0	0	0	1	1	0	0	0	0	0	1.4
1	44	1	1	0	0	0	0	0			88.2	5500000	1	1	1	6	0	0	0	1	0	0	0	0	1	0	0	0	1	0	1	1	0	0	0	1.33333
1	36	1	1	0	0	0	0	0			318.42	171000	0	0	1	6	0	0	0	1	0	0	0	0	1	0	0	0	1	1	0	0	0	0	0	0.933333
1	46	1	1	0	0	0	1	0			133.358	126000	0	1	1	6	0	0	0	1	0	0	0	0	1	0	0	0	1	1	0	0	0	0	0	0.466667
1	37	1	1	0	0	0	0	0			415.53	22300	0	0	1	6	0	0	0	1	0	0	0	0	1	0	0	0	0	0	0	0	0	0	0	6
1	26	1	1	0	0	0	0	0			278.435	20500	0	0	1	6	0	0	0	1	0	0	0	0	1	0	0	0	0	0	0	0	0	0	0	6
1	46	1	1	0	0	0	0	0			185.617	1580000	1	1	1	6	0	0	0	1	0	0	0	0	1	0	0	0	1	1	0	0	0	0	0	0.5
1	46	1	1	0	0	0	0	0			297.149	22500	0	0	1	6	0	0	0	1	0	0	0	0	1	0	0	0	1	1	0	0	0	0	0	0.433333
1	31	1	1	0	0	0	0	0			306.944	176000	0	0	1	6	0	0	0	1	0	0	0	0	1	0	0	0	0	0	0	0	0	0	0	6
1	25	1	1	0	0	0	0	0			318.63	4920	0	0	1	6	0	0	0	1	0	0	0	0	1	0	0	0	0	0	0	0	0	0	0	6
1	46	1	0	1	0	0	0	0			4.8374	266000	0	1	1	6	0	0	0	1	0	0	0	0	1	0	0	0	1	1	0	0	0	0	0	0.1
1	26	1	1	0	0	0	0	0			307.82	14300	0	0	1	6	0	0	0	1	0	0	0	0	1	0	0	0	0	0	0	0	0	0	0	6
1	30	1	1	0	0	0	0	0			470.25	135000	0	0	1	6	0	0	0	1	0	0	0	0	1	0	0	0	1	1	0	0	0	0	0	0.333333
1	45	1	1	0	0	0	0	0			32.346	89800	1	1	1	6	0	0	0	1	0	0	0	0	1	0	0	0	1	1	0	0	0	0	0	0.666667
1	26	1	1	0	0	0	0	0			306.816	3300	0	0	1	6	0	0	0	1	0	0	0	0	1	0	0	0	0	0	0	0	0	0	0	6
1	33	1	1	0	0	0	0	0			265.132	14700	0	0	1	6	0	0	0	1	0	0	0	0	1	0	0	0	1	1	0	0	0	0	0	0.466667
1	38	1	1	0	0	0	1	0			393	14200	0	0	1	6	0	0	0	1	0	0	0	0	0	0	1	0	1	0	0	0	0	0	1	0.7
1	31	1	1	0	0	0	0	0			408.074	409000	0	0	1	6	0	0	0	1	0	0	0	0	1	0	0	0	1	1	0	0	0	0	0	0.7
1	33	1	1	0	0	0	0	0			331.313	30600	0	0	1	6	0	0	0	1	0	0	0	0	1	0	0	0	0	0	0	0	0	0	0	6
1	22	1	1	0	0	0	0	0			281.811	112000	0	0	1	6	0	0	0	1	0	0	0	0	0	0	1	0	0	0	0	0	0	0	0	6
1	31	1	1	0	0	0	0	0			31.932	792000	0	1	1	6	0	0	0	1	0	0	0	0	1	0	0	0	0	0	0	0	0	0	0	6
1	45	1	1	0	0	0	1	0			48.3084	715000	1	1	1	6	0	0	0	1	0	0	0	0	1	0	0	0	1	1	0	0	0	0	0	0.433333
1	28	1	1	0	0	0	0	0			284.592	2410	0	0	1	6	0	0	0	1	0	0	0	0	1	0	0	0	1	1	0	0	0	0	0	0.8
1	28	1	1	0	0	0	0	0			468.882	91500	0	0	1	6	0	0	0	1	0	0	0	0	0	1	0	0	1	1	0	0	0	0	0	1.16667
1	28	1	1	0	0	0	0	0			244.652	27500	0	0	1	6	0	0	0	1	0	0	0	0	1	0	0	0	0	0	0	0	0	0	0	6
1	37	1	1	0	0	0	1	0			111.734	1150000	1	1	1	6	0	0	0	1	0	0	0	0	1	0	0	0	1	0	1	1	0	0	0	0.933333
1	50	0	0	1	0	0	0	0			207.262	353	0	0	1	6	0	0	0	1	0	0	0	0	1	0	0	0	0	0	0	0	0	0	0	6
1	25	1	1	0	0	0	0	0			880.121	13000	0	0	0	6	0	0	0	1	0	0	0	0	1	0	0	0	0	0	0	0	0	0	0	6
1	24	1	1	0	0	0	0	0			416.213	82000	0	0	1	6	0	0	0	1	0	0	0	0	1	0	0	0	0	0	0	0	0	0	0	6
1	32	1	1	0	0	0	0	0			125.78	>10000000	0	1	1	6	0	0	0	1	0	0	0	0	1	0	0	0	1	1	0	0	0	0	0	0.466667
1	44	1	1	0	0	0	1	0			12.8225	165000	1	1	1	6	0	0	0	1	0	0	0	0	1	0	0	0	1	0	1	1	0	0	0	2.06667
1	22	1	0	1	0	0	1	0			216.832	105000	0	0	1	6	0	0	0	1	0	0	0	0	1	0	0	0	0	0	0	0	0	0	0	6
1	33	1	1	0	0	0	0	0			314.958	88400	0	0	1	6	0	0	0	1	0	0	0	0	1	0	0	0	0	0	0	0	0	0	0	6
1	34	1	1	0	0	0	1	0			113.643	118000	0	1	1	6	0	0	0	1	0	0	0	0	1	0	0	0	1	0	1	1	0	0	0	4.53333
1	46	1	1	0	0	0	1	0			384.848	26700	0	0	1	6	0	0	0	1	0	0	0	0	1	0	0	0	0	0	0	0	0	0	0	6
1	25	1	1	0	0	0	0	0			253.406	69900	0	0	1	6	0	0	0	1	0	0	0	0	1	0	0	0	0	0	0	0	0	0	0	6
1	37	1	1	0	0	0	1	0			690.703	8720	0	0	0	6	0	0	0	1	0	0	0	0	1	0	0	0	0	0	0	0	0	0	0	6
1	39	1	1	0	0	0	0	0			21.4124	801000	1	1	1	6	0	0	0	1	0	0	0	0	1	0	0	0	0	0	0	0	0	0	0	6
1	29	1	1	0	0	0	0	0			354.57	66200	0	0	1	6	0	0	0	1	0	0	0	0	1	0	0	0	1	1	0	0	0	0	0	2.1
1	35	1	1	0	0	0	0	0			248.184	153000	0	0	1	6	0	0	0	1	0	0	0	0	1	0	0	0	0	0	0	0	0	0	0	6
1	27	1	1	0	0	0	0	0			469.771	28200	0	0	1	6	0	0	0	1	0	0	0	0	1	0	0	0	0	0	0	0	0	0	0	6
1	32	1	1	0	0	0	0	0			307.61	40500	0	0	1	6	0	0	0	1	0	0	0	0	1	0	0	0	0	0	0	0	0	0	0	6
1	76	1	1	0	0	0	0	0			59.202	392000	0	1	1	6	0	0	0	1	0	0	0	0	1	0	0	0	0	0	0	0	0	0	0	6
1	43	1	1	0	0	0	0	0			29.592	93800	1	1	1	6	0	0	0	1	0	0	0	0	1	0	0	0	0	0	0	0	0	0	0	6
1	38	1	1	0	0	0	0	0			519.453	119000	0	0	0	6	0	0	0	1	0	0	0	0	1	0	0	0	1	1	0	0	0	0	0	2.56667
1	40	1	1	0	0	0	0	0			459.842	58000	0	0	1	6	0	0	0	1	0	0	0	0	1	0	0	0	0	0	0	0	0	0	0	6
1	28	1	1	0	0	0	0	0			324.489	21600	0	0	1	6	0	0	0	1	0	0	0	0	1	0	0	0	0	0	0	0	0	0	0	6
1	28	1	1	0	0	0	0	0			273.412	778000	0	0	1	6	0	0	0	1	0	0	0	0	1	0	0	0	1	1	0	0	0	0	0	0.466667
1	25	1	1	0	0	0	0	0			277.2	531000	0	0	1	6	0	0	0	1	0	0	0	0	1	0	0	0	1	1	0	0	0	0	0	1.23333
1	35	1	1	0	0	0	0	0			608.899	490000	0	0	0	6	0	0	0	1	0	0	0	0	1	0	0	0	0	0	0	0	0	0	0	6
1	42	1	1	0	0	0	0	0			258.469	60500	0	0	1	6	0	0	0	1	0	0	0	0	1	0	0	0	0	0	0	0	0	0	0	6
1	23	1	1	0	0	0	0	0			257.58	216000	0	0	1	6	0	0	0	1	0	0	0	0	1	0	0	0	0	0	0	0	0	0	0	6
1	23	1	1	0	0	0	0	0			273.212	246000	0	0	1	6	0	0	0	1	0	0	0	0	1	0	0	0	0	0	0	0	0	0	0	6
1	28	1	1	0	0	0	0	0			246.816	5760000	0	0	1	6	0	0	0	1	0	0	0	0	1	0	0	0	0	0	0	0	0	0	0	6
1	34	1	1	0	0	0	0	0			418.918	1030000	0	0	1	6	0	0	0	1	0	0	0	0	1	0	0	0	0	0	0	0	0	0	0	6
1	35	1	1	0	0	0	0	0			375.289	43300	0	0	1	6	0	0	0	1	0	0	0	0	1	0	0	0	0	0	0	0	0	0	0	6
1	25	1	1	0	0	0	0	0			336.699	23600	0	0	1	6	0	0	0	1	0	0	0	0	1	0	0	0	0	0	0	0	0	0	0	6
1	25	1	1	0	0	0	0	0			380.87	42500	0	0	1	6	0	0	0	1	0	0	0	0	1	0	0	0	0	0	0	0	0	0	0	6
1	31	1	1	0	0	0	0	0			27.4908	122000	0	1	1	6	0	0	0	1	0	0	0	0	1	0	0	0	1	1	0	0	0	0	0	2.33333
1	26	1	1	0	0	0	0	0			33.5336	365000	0	1	1	6	0	0	0	1	0	0	0	0	1	0	0	0	1	1	0	0	0	0	0	1.06667
1	26	1	1	0	0	0	0	0			468.528	12700	0	0	1	6	0	0	0	1	0	0	0	0	1	0	0	0	0	0	0	0	0	0	0	6
1	32	1	1	0	0	0	0	0			718.308	88900	0	0	0	6	0	0	0	1	0	0	0	0	1	0	0	0	0	0	0	0	0	0	0	6
1	35	1	1	0	0	0	0	0			210.33	134000	0	0	1	6	0	0	0	1	0	0	0	0	1	0	0	0	0	0	0	0	0	0	0	6
1	60	1	1	0	0	0	0	0			28.737	1270000	1	1	1	6	0	0	0	1	0	0	0	0	1	0	0	0	1	0	1	1	0	0	0	1.16667
1	47	1	1	0	0	0	0	0			452.19	54200	0	0	1	6	0	0	0	1	0	0	0	0	1	0	0	0	0	0	0	0	0	0	0	6
1	36	1	1	0	0	0	1	0			339.72	6980	0	0	1	6	0	0	0	1	0	0	0	0	1	0	0	0	1	1	0	0	0	0	0	1.16667
1	24	1	1	0	0	0	0	0			887.644	1270	0	0	0	6	0	0	0	1	0	0	0	0	1	0	0	0	1	1	0	0	0	0	0	0.666667
1	32	1	1	0	0	0	0	0			333.022	67500	0	0	1	6	0	0	0	1	0	0	0	0	1	0	0	0	0	0	0	0	0	0	0	6
1	45	1	1	0	0	0	0	0			151.2	50700	0	1	1	6	0	0	0	1	0	0	0	0	1	0	0	0	0	0	0	0	0	0	0	6
1	23	1	1	0	0	0	0	0			615.938	137000	0	0	0	6	0	0	0	1	0	0	0	0	0	0	1	0	0	0	0	0	0	0	0	6
1	60	0	0	1	0	0	0	1			140.996	15700	0	1	1	6	0	0	0	1	0	0	0	0	1	0	0	0	1	1	1	1	0	0	0	0.933333
1	28	1	1	0	0	0	0	0			305.292	33000	0	0	1	6	0	0	0	1	0	0	0	0	1	0	0	0	1	1	0	0	0	0	0	1.16667
1	38	0	0	0	1	0	0	1			101.49	125000	0	1	1	6	0	0	0	1	0	0	0	0	1	0	0	0	0	0	0	0	0	0	0	6
1	30	1	1	0	0	0	0	0			204.826	80387	0	0	1	6	0	0	0	1	0	0	0	0	1	0	0	0	1	1	0	0	0	0	0	1.5
1	30	1	1	0	0	0	0	0			371.238	527000	0	0	1	6	0	0	0	1	0	0	0	0	1	0	0	0	0	0	0	0	0	0	0	6
1	24	1	1	0	0	0	0	0			342.023	674000	0	0	1	6	0	0	0	1	0	0	0	0	0	1	0	0	1	1	0	0	0	0	0	0.7
1	46	1	1	0	0	0	0	0			267.775	21700	0	0	1	6	0	0	0	1	0	0	0	0	1	0	0	0	0	0	0	0	0	0	0	6
1	33	1	1	0	0	0	0	0			331.726	70800	0	0	1	6	0	0	0	0	1	0	0	0	1	0	0	0	1	0	1	1	0	0	0	4.2
1	37	1	1	0	0	0	0	0			311.372	11700	0	0	1	6	0	0	0	0	1	0	0	0	1	0	0	0	1	1	0	0	0	0	0	0.466667
1	30	1	1	0	0	0	0	0			805.253	27800	0	0	0	6	0	0	0	0	1	0	0	0	1	0	0	0	0	0	0	0	0	0	0	6
1	24	1	1	0	0	0	0	0			415.293	54500	0	0	1	6	0	0	0	0	1	0	0	0	1	0	0	0	0	0	0	0	0	0	0	6
1	36	1	1	0	0	0	0	0			14.7136	69000	1	1	1	6	0	0	0	0	1	0	0	0	1	0	0	0	1	0	1	1	0	0	0	3.96667
1	29	1	1	0	0	0	0	0			407.983	84300	0	0	1	6	0	0	0	0	1	0	0	0	1	0	0	0	0	0	0	0	0	0	0	6
1	50	1	1	0	0	0	0	1			374.256	19100	0	0	1	6	0	0	0	0	1	0	0	0	1	0	0	0	1	0	1	1	0	0	0	1.86667
1	40	1	1	0	0	0	0	0			323.503	6620	0	0	1	6	0	0	0	0	1	0	0	0	1	0	0	0	1	1	0	0	0	0	0	2.8
1	23	1	1	0	0	0	0	0			509.064	23900	0	0	0	6	0	0	0	0	1	0	0	0	1	0	0	0	0	0	0	0	0	0	0	6
1	25	1	1	0	0	0	0	0			249.48	177000	0	0	1	6	0	0	0	0	1	0	0	0	1	0	0	0	1	0	1	1	0	0	0	1.16667
1	34	1	1	0	0	0	0	0			67.9496	77700	0	1	1	6	0	0	0	0	1	0	0	0	1	0	0	0	1	0	1	1	0	0	0	2.03333
1	23	1	1	0	0	0	0	0			459.832	176000	0	0	1	6	0	0	0	0	1	0	0	0	1	0	0	0	0	0	0	0	0	0	0	6
1	20	1	1	0	0	0	0	0			665.799	11600	0	0	0	6	0	0	0	0	1	0	0	0	1	0	0	0	0	0	0	0	0	0	0	6
1	33	1	1	0	0	0	1	0			12.98	240000	0	1	1	6	0	0	0	0	1	0	0	0	1	0	0	0	0	0	0	0	0	0	0	6
1	31	1	1	0	0	0	1	0			506.196	9250	0	0	0	6	0	0	0	0	1	0	0	0	0	0	1	0	0	0	0	0	0	0	0	6
1	47	1	1	0	0	0	0	0			103.675	312000	0	1	1	6	0	0	0	0	1	0	0	0	1	0	0	0	0	0	0	0	0	0	0	6
1	41	1	1	0	0	0	1	0			446.62	35900	0	0	1	6	0	0	0	0	1	0	0	0	1	0	0	0	1	1	0	0	0	0	0	0.5
1	24	1	1	0	0	0	0	0			434.248	3500	0	0	1	6	0	0	0	0	1	0	0	0	1	0	0	0	0	0	0	0	0	0	0	6
1	29	1	1	0	0	0	0	0			251.459	105000	0	0	1	6	0	0	0	0	1	0	0	0	1	0	0	0	0	0	0	0	0	0	0	6
1	35	1	1	0	0	0	1	0			309.73	4740	0	0	1	6	0	0	0	0	1	0	0	0	1	0	0	0	1	1	0	0	0	0	0	0.466667
1	25	1	1	0	0	0	0	0			293.834	155000	0	0	1	6	0	0	0	0	1	0	0	0	1	0	0	0	1	1	0	0	0	0	0	5.83333
1	32	1	1	0	0	0	0	0			124.341	399000	1	1	1	6	0	0	0	0	1	0	0	0	1	0	0	0	1	1	0	0	0	0	0	0.933333
1	24	1	1	0	0	0	0	0			480.197	72700	0	0	1	1.86667	0	0	0	0	1	0	0	0	1	0	0	0	1	1	0	0	0	0	0	0.466667
1	37	1	1	0	0	0	0	0			230.105	61900	0	0	1	6	0	0	0	0	1	0	0	0	1	0	0	0	1	1	0	0	0	0	0	0.533333
1	29	1	1	0	0	0	0	0			395.472	13600	0	0	1	6	0	0	0	0	1	0	0	0	1	0	0	0	0	0	0	0	0	0	0	6
1	36	1	1	0	0	0	0	0			513	6450	0	0	0	6	0	0	0	0	1	0	0	0	1	0	0	0	0	0	0	0	0	0	0	6
1	38	1	1	0	0	0	0	0			338.247	26100	0	0	1	6	0	0	0	0	1	0	0	0	1	0	0	0	1	1	0	0	0	0	0	3.73333
1	27	1	1	0	0	0	0	0			260.338	3780000	0	0	1	6	0	0	0	0	1	0	0	0	1	0	0	0	1	1	0	0	0	0	0	3.03333
1	27	1	1	0	0	0	0	0			385.203	6120	0	0	1	6	0	0	0	0	1	0	0	0	1	0	0	0	0	0	0	0	0	0	0	6
1	42	1	0	0	1	0	1	1			214.76	9570	0	0	1	6	0	0	0	0	1	0	0	0	1	0	0	0	1	1	0	0	0	0	0	1.2
1	38	1	1	0	0	0	0	0			244.992	30700	0	0	1	6	0	0	0	0	1	0	0	0	1	0	0	0	1	1	0	0	0	0	0	3.26667
1	25	1	1	0	0	0	0	0			269.99	5790	0	0	1	6	0	0	0	0	1	0	0	0	1	0	0	0	1	0	1	1	0	0	0	0.7
1	27	1	1	0	0	0	0	0			267.912	82300	0	0	1	6	0	0	0	0	1	0	0	0	1	0	0	0	0	0	0	0	0	0	0	6
1	36	1	1	0	0	0	1	0			409.248	200000	0	0	1	6	0	0	0	0	1	0	0	0	1	0	0	0	1	1	0	0	0	0	0	4.43333
1	39	0	0	1	0	0	0	1			357.408	25600	0	0	1	6	0	0	0	0	1	0	0	0	1	0	0	0	0	0	0	0	0	0	0	6
1	36	1	1	0	0	0	0	0			336.501	29300	0	0	1	6	0	0	0	0	1	0	0	0	1	0	0	0	0	0	0	0	0	0	0	6
1	54	1	1	0	0	0	0	0			79.002	225000	0	1	1	6	0	0	0	0	1	0	0	0	1	0	0	0	1	0	1	1	0	0	0	1.16667
1	22	1	1	0	0	0	0	0			338.877	11100	0	0	1	6	0	0	0	0	1	0	0	0	1	0	0	0	1	1	0	0	0	0	0	4.66667
1	21	1	1	0	0	0	0	0			314.16	523000	0	0	1	6	0	0	0	0	1	0	0	0	1	0	0	0	1	1	0	0	0	0	0	5.13333
1	21	1	1	0	0	0	0	0			301.551	32600	0	0	1	6	0	0	0	0	1	0	0	0	1	0	0	0	0	0	0	0	0	0	0	6
1	36	1	1	0	0	0	0	0			726.376	40400	0	0	0	6	0	0	0	0	1	0	0	0	1	0	0	0	1	1	0	0	0	0	0	3.96667
1	33	1	1	0	0	0	0	0			183.126	31600	0	1	1	6	0	0	0	0	1	0	0	0	1	0	0	0	1	1	0	0	0	0	0	4.43333
1	32	1	1	0	0	0	0	0			629.76	3250	0	0	0	6	0	0	0	0	1	0	0	0	1	0	0	0	1	1	0	0	0	0	0	0.466667
1	55	1	1	0	0	0	0	1			665.229	39700	0	0	0	6	0	0	0	0	1	0	0	0	1	0	0	0	1	0	1	1	0	0	0	0.533333
1	49	0	0	1	0	0	0	0			702.5	39200	0	0	0	6	0	0	0	0	1	0	0	0	1	0	0	0	0	0	0	0	0	0	0	6
1	39	1	0	0	1	0	0	1			51.5504	897000	1	1	1	6	0	0	0	0	1	0	0	0	1	0	0	0	1	1	0	0	0	0	0	4.6
1	33	1	1	0	0	0	0	0			467.68	12100	0	0	1	6	0	0	0	0	1	0	0	0	1	0	0	0	1	1	0	0	0	0	0	5.13333
1	26	1	1	0	0	0	0	0			256.077	29900	0	0	1	6	0	0	0	0	1	0	0	0	1	0	0	0	0	0	0	0	0	0	0	6
1	32	1	1	0	0	0	0	0			923.737	253000	0	0	0	6	0	0	0	0	1	0	0	0	1	0	0	0	1	1	0	0	0	0	0	3.96667
1	67	1	1	0	0	0	0	0			80.1	359000	1	1	1	0.766667	0	0	0	0	1	0	0	0	1	0	0	1	0	0	0	0	0	0	0	0.8
1	29	1	1	0	0	0	0	0			729.043	3480	0	0	0	6	0	0	0	0	1	0	0	0	1	0	0	0	1	1	0	0	0	0	0	3.73333
1	22	1	1	0	0	0	0	0			356.621	66800	0	0	1	6	0	0	0	0	1	0	0	0	1	0	0	0	1	1	0	0	0	0	0	0.533333
1	35	1	1	0	0	0	1	0			34.0065	526000	1	1	1	6	0	0	0	0	1	0	0	0	1	0	0	0	0	0	0	0	0	0	0	6
1	61	0	0	1	0	0	0	0			385.2	13900	0	0	1	6	0	0	0	0	1	0	0	0	1	0	0	0	0	0	0	0	0	0	0	6
1	34	0	0	1	0	0	0	0			660.504	2070	0	0	0	3.53333	0	0	0	0	1	0	0	0	1	0	0	0	0	0	0	0	0	0	0	6
1	28	1	1	0	0	0	0	0			114.66	392000	0	1	1	6	0	0	0	0	1	0	0	0	1	0	0	0	1	1	0	0	0	0	0	4.2
1	31	1	1	0	0	0	0	0			320.933	36000	0	0	1	6	0	0	0	0	1	0	0	0	1	0	0	0	1	1	0	0	0	0	0	3.03333
1	25	1	1	0	0	0	0	0			280.426	223	0	0	1	6	0	0	0	0	1	0	0	0	1	0	0	0	0	0	0	0	0	0	0	6
1	25	1	1	0	0	0	0	0			119.511	5920000	1	1	1	6	0	0	0	0	1	0	0	0	1	0	0	0	1	1	0	0	0	0	0	4.2
1	29	1	1	0	0	0	0	0			309.976	51100	0	0	1	3.96667	0	0	0	0	1	0	0	0	1	0	0	0	1	0	1	0	1	0	0	4
1	24	1	1	0	0	0	0	0			225.957	81500	0	0	1	6	0	0	0	0	1	0	0	0	1	0	0	0	0	0	0	0	0	0	0	6
1	22	1	1	0	0	0	0	0			375.918	105000	0	0	1	6	0	0	0	0	1	0	0	0	1	0	0	0	1	0	1	1	0	0	0	2.33333
1	29	1	1	0	0	0	0	0			378.344	3390	0	0	1	6	0	0	0	0	1	0	0	0	1	0	0	0	0	0	0	0	0	0	0	6
1	37	1	1	0	0	0	0	0			91.443	92100	1	1	1	6	0	0	0	0	1	0	0	0	1	0	0	0	1	1	0	0	0	0	0	2.7
1	46	1	1	0	0	0	0	0			612.573	23800	0	0	0	6	0	0	0	0	1	0	0	0	1	0	0	0	1	1	0	0	0	0	0	1.4
1	35	1	1	0	0	0	0	0			281	91581	0	0	1	6	0	0	0	0	1	0	0	0	1	0	0	0	1	1	0	0	0	0	0	3.96667
1	23	1	0	1	0	0	0	0			326.167	47300	0	0	1	6	0	0	0	0	1	0	0	0	1	0	0	0	1	1	0	0	0	0	0	0.433333
1	28	1	1	0	0	0	0	0			304.646	>10000000	0	0	1	6	0	0	0	0	1	0	0	0	1	0	0	0	1	0	1	1	0	0	0	0.4
1	26	1	1	0	0	0	0	0			431.558	66500	0	0	1	6	0	0	0	0	1	0	0	0	1	0	0	0	0	0	0	0	0	0	0	6
1	34	1	1	0	0	0	1	0			299.002	12900	0	0	1	6	0	0	0	0	1	0	0	0	1	0	0	0	1	1	0	0	0	0	0	2.33333
1	33	1	1	0	0	0	0	0			229.862	27000	0	0	1	6	0	0	0	0	1	0	0	0	1	0	0	0	1	1	0	0	0	0	0	2.56667
1	29	1	1	0	0	0	0	0			209.198	5350000	0	0	1	6	0	0	0	0	1	0	0	0	1	0	0	0	1	1	0	0	0	0	0	3.96667
1	24	1	1	0	0	0	0	0			47.9808	321000	1	1	1	6	0	0	0	0	1	0	0	0	1	0	0	0	1	1	0	0	0	0	0	0.3
1	55	1	1	0	0	0	1	0			249.48	6150	0	0	1	6	0	0	0	0	1	0	0	0	0	1	0	0	0	0	0	0	0	0	0	6
1	26	1	1	0	0	0	0	0			39.694	426000	1	1	1	6	0	0	0	0	1	0	0	0	1	0	0	0	1	1	0	0	0	0	0	0.833333
1	30	1	1	0	0	0	0	0			301.686	250000	0	0	1	6	0	0	0	0	1	0	0	0	1	0	0	0	1	1	0	0	0	0	0	0.466667
1	43	1	1	0	0	0	0	0			395.52	2990000	0	0	1	6	0	0	0	0	1	0	0	0	1	0	0	0	1	1	0	0	0	0	0	4.93333
1	37	1	1	0	0	0	0	0			124.033	1140000	0	1	1	6	0	0	0	0	1	0	0	0	1	0	0	0	1	1	0	0	0	0	0	0.266667
1	39	1	1	0	0	0	0	0			8.016	151000	1	1	1	0.2	0	0	0	0	1	0	0	0	1	0	0	1	0	0	0	0	0	0	0	0.2
1	36	1	1	0	0	0	0	0			275.088	200000	0	0	1	6	0	0	0	0	1	0	0	0	1	0	0	0	1	0	1	1	0	0	0	2.33333
1	26	1	1	0	0	0	0	0			373.302	30400	0	0	1	6	0	0	0	0	1	0	0	0	1	0	0	0	0	0	0	0	0	0	0	6
1	21	1	1	0	0	0	0	0			324.963	151000	0	0	1	6	0	0	0	0	1	0	0	0	1	0	0	0	1	1	0	0	0	0	0	0.466667
1	40	1	1	0	0	0	0	0			296.856	1860000	0	0	1	6	0	0	0	0	1	0	0	0	0	0	1	0	0	0	0	0	0	0	0	6
1	28	1	1	0	0	0	0	0			474.32	96900	0	0	1	6	0	0	0	0	1	0	0	0	1	0	0	0	0	0	0	0	0	0	0	6
1	20	1	1	0	0	0	0	0			303.01	34800	0	0	1	6	0	0	0	0	1	0	0	0	1	0	0	0	1	1	0	0	0	0	0	0.7
1	30	1	1	0	0	0	0	0			367.059	16000	0	0	1	6	0	0	0	0	1	0	0	0	1	0	0	0	0	0	0	0	0	0	0	6
1	32	1	1	0	0	0	0	0			485.73	50600	0	0	1	6	0	0	0	0	1	0	0	0	1	0	0	0	0	0	0	0	0	0	0	6
1	31	1	1	0	0	0	0	0			18.6405	197000	0	1	1	6	0	0	0	0	1	0	0	0	1	0	0	0	0	0	0	0	0	0	0	6
1	41	1	1	0	0	0	0	0			118.653	191000	1	1	1	6	0	0	0	0	1	0	0	0	1	0	0	0	0	0	0	0	0	0	0	6
1	55	1	0	0	1	0	0	1			143.04	68000	0	1	1	0.266667	0	0	0	0	1	0	0	0	0	0	1	1	0	0	0	0	0	0	0	0.3
1	21	1	1	0	0	0	0	0			350.752	99500	0	0	1	6	0	0	0	0	1	0	0	0	1	0	0	0	1	1	0	0	0	0	0	0.466667
1	32	1	1	0	0	0	0	0			243.165	27000	1	1	1	6	0	0	0	0	1	0	0	0	0	0	1	0	1	1	0	0	0	0	0	0.433333
1	31	1	1	0	0	0	0	0			60.2112	293000	0	1	1	6	0	0	0	0	1	0	0	0	1	0	0	0	1	1	0	0	0	0	0	0.4
1	46	1	1	0	0	0	0	0			27.3036	615000	1	1	1	6	0	0	0	0	1	0	0	0	1	0	0	0	1	1	0	0	0	0	0	5.63333
1	30	1	1	0	0	0	0	0			405.308	40900	0	0	1	6	0	0	0	0	1	0	0	0	1	0	0	0	1	1	0	0	0	0	0	2.56667
1	29	1	1	0	0	0	0	0			378.367	14000	0	0	1	6	0	0	0	0	1	0	0	0	1	0	0	0	0	0	0	0	0	0	0	6
1	67	1	0	1	0	0	0	0			529.975	24900	0	0	0	6	0	0	0	0	1	0	0	0	1	0	0	0	0	0	0	0	0	0	0	6
1	36	1	1	0	0	0	0	0			264.726	151000	0	0	1	6	0	0	0	0	1	0	0	0	1	0	0	0	1	1	0	0	0	0	0	1.63333
1	34	1	1	0	0	0	0	0			120.364	86900	0	1	1	6	0	0	0	0	1	0	0	0	1	0	0	0	1	0	1	1	0	0	0	1.16667
1	33	1	1	0	0	0	0	0			457.354	105000	0	0	1	6	0	0	0	0	1	0	0	0	1	0	0	0	0	0	0	0	0	0	0	6
1	19	1	1	0	0	0	0	0			161.143	11500000	0	1	1	6	0	0	0	0	1	0	0	0	0	0	1	0	1	1	0	0	0	0	0	2.13333
1	27	1	1	0	0	0	0	0			463.003	1340000	0	0	1	6	0	0	0	0	1	0	0	0	0	0	1	0	0	0	0	0	0	0	0	6
1	28	1	1	0	0	0	0	0			371.108	77500	0	0	1	6	0	0	0	0	1	0	0	0	1	0	0	0	0	0	0	0	0	0	0	6
1	34	1	1	0	0	0	0	0			6.276	722000	0	1	1	6	0	0	0	0	1	0	0	0	1	0	0	0	1	1	0	0	0	0	0	0.933333
1	39	1	1	0	0	0	0	0			93.961	158000	0	1	1	6	0	0	0	0	1	0	0	0	1	0	0	0	1	1	0	0	0	0	0	0.2
1	34	1	1	0	0	0	0	0			28.875	448000	1	1	1	6	0	0	0	0	1	0	0	0	1	0	0	0	1	0	0	0	0	1	0	0.933333
1	70	0	0	1	0	0	0	0			463.752	30700	0	0	1	6	0	0	0	0	1	0	0	0	1	0	0	0	0	0	0	0	0	0	0	6
1	31	1	1	0	0	0	0	0			24.345	314000	0	1	1	6	0	0	0	0	1	0	0	0	1	0	0	0	1	1	0	0	0	0	0	0.866667
1	26	1	1	0	0	0	0	0			571.428	88100	0	0	0	6	0	0	0	0	1	0	0	0	1	0	0	0	1	1	0	0	0	0	0	1.16667
1	28	1	1	0	0	0	0	0			571.428	88100	0	0	0	6	0	0	0	0	1	0	0	0	1	0	0	0	1	1	0	0	0	0	0	1.16667
1	30	1	1	0	0	0	0	0			379.323	1430	0	0	1	6	0	0	0	0	1	0	0	0	1	0	0	0	1	1	0	0	0	0	0	1.16667
1	16	1	1	0	0	0	0	0			157.5	1690000	0	1	1	6	0	0	0	0	1	0	0	0	1	0	0	0	1	1	0	0	0	0	0	0.566667
1	29	1	1	0	0	0	1	0			0	153000	1	1	1	6	0	0	0	0	1	0	0	0	1	0	0	0	1	1	0	0	0	0	0	0.966667
1	34	1	1	0	0	0	0	0			536.112	39800	0	0	0	6	0	0	0	0	1	0	0	0	1	0	0	0	1	1	0	0	0	0	0	0.466667
1	75	1	1	0	0	0	0	0			37.719	2000000	1	1	1	0.933333	0	0	0	0	1	0	0	0	1	0	0	1	0	0	0	0	0	0	0	0.9
1	30	1	1	0	0	0	0	0			86.751	328000	0	1	1	6	0	0	0	0	1	0	0	0	1	0	0	0	1	0	1	1	0	0	0	0.733333
1	26	1	1	0	0	0	0	0			402.96	45700	0	0	1	6	0	0	0	0	0	1	0	0	1	0	0	0	0	0	0	0	0	0	0	6
1	28	1	1	0	0	0	1	0			166.479	125000	0	1	1	6	0	0	0	0	0	1	0	0	1	0	0	0	1	0	1	1	0	0	0	1.16667
1	26	1	1	0	0	0	0	0			320.712	24600	0	0	1	6	0	0	0	0	0	1	0	0	1	0	0	0	1	1	0	0	0	0	0	0.466667
1	36	1	1	0	0	0	0	0			107.03	3200000	0	1	1	6	0	0	0	0	0	1	0	0	1	0	0	0	1	0	1	1	0	0	0	3.53333
1	36	1	0	1	0	0	0	0			39.984	401000	1	1	1	6	0	0	0	0	0	1	0	0	1	0	0	0	1	1	0	0	0	0	0	2.73333
1	44	1	1	0	0	0	0	0			12.24	148000	0	1	1	6	0	0	0	0	0	1	0	0	1	0	0	0	1	1	0	0	0	0	0	3.96667
1	21	1	1	0	0	0	0	0			373.817	11800	0	0	1	6	0	0	0	0	0	1	0	0	1	0	0	0	1	1	0	0	0	0	0	0.466667
1	38	1	1	0	0	0	0	0			450.186	16900	0	0	1	6	0	0	0	0	0	1	0	0	1	0	0	0	0	0	0	0	0	0	0	6
1	38	1	1	0	0	0	0	0			61.5424	1920000	0	1	1	6	0	0	0	0	0	1	0	0	1	0	0	0	0	0	0	0	0	0	0	6
1	30	1	1	0	0	0	1	0			389.86	34400	0	0	1	6	0	0	0	0	0	1	0	0	1	0	0	0	0	0	0	0	0	0	0	6
1	27	1	1	0	0	0	0	0			230.175	88600	0	0	1	6	0	0	0	0	0	1	0	0	1	0	0	0	1	0	1	1	0	0	0	0.966667
1	30	1	1	0	0	0	0	0			372.504	8450	0	0	1	6	0	0	0	0	0	1	0	0	1	0	0	0	0	0	0	0	0	0	0	6
1	39	1	1	0	0	0	0	0			422.67	280000	0	0	1	6	0	0	0	0	0	1	0	0	1	0	0	0	1	1	0	0	0	0	0	1.16667
1	34	1	1	0	0	0	0	0			345.421	83100	0	0	1	6	0	0	0	0	0	1	0	0	1	0	0	0	0	0	0	0	0	0	0	6
1	23	1	1	0	0	0	1	0			718.318	1060000	0	0	0	6	0	0	0	0	0	1	0	0	1	0	0	0	0	0	0	0	0	0	0	6
1	33	1	1	0	0	0	0	0			504.773	112000	0	0	0	6	0	0	0	0	0	1	0	0	1	0	0	0	1	1	0	0	0	0	0	0.466667
1	31	1	1	0	0	0	0	0			159.728	97700	0	1	1	6	0	0	0	0	0	1	0	0	1	0	0	0	0	0	0	0	0	0	0	6
1	26	1	1	0	0	0	0	0			437.03	150000	0	0	1	6	0	0	0	0	0	1	0	0	1	0	0	0	1	1	0	0	0	0	0	0.933333
1	31	1	1	0	0	0	0	0			40.2976	104000	0	1	1	6	0	0	0	0	0	1	0	0	1	0	0	0	0	0	0	0	0	0	0	6
1	36	1	1	0	0	0	0	0			20.8236	177000	1	1	1	6	0	0	0	0	0	1	0	0	1	0	0	0	0	0	0	0	0	0	0	6
1	45	1	1	0	0	0	0	0			6.5703	171000	1	1	1	6	0	0	0	0	0	1	0	0	1	0	0	0	1	1	0	0	0	0	0	0.0333333
1	38	1	1	0	0	0	0	0			389.03	102000	0	0	1	6	0	0	0	0	0	1	0	0	1	0	0	0	0	0	0	0	0	0	0	6
1	25	1	1	0	0	0	0	0			370.928	31900	0	0	1	6	0	0	0	0	0	1	0	0	1	0	0	0	1	1	0	0	0	0	0	0.466667
1	37	0	0	1	0	0	0	0			853.412	39000	0	0	0	6	0	0	0	0	0	1	0	0	0	0	1	0	0	0	0	0	0	0	0	6
1	46	1	1	0	0	0	0	0			279.9	192000	0	0	1	6	0	0	0	0	0	1	0	0	1	0	0	0	1	1	0	0	0	0	0	0.466667
1	25	1	1	0	0	0	0	0			378.84	31900	0	0	1	6	0	0	0	0	0	1	0	0	1	0	0	0	1	1	0	0	0	0	0	0.966667
1	40	1	1	0	0	0	1	0			354.874	36900	0	0	1	6	0	0	0	0	0	1	0	0	1	0	0	0	1	0	0	0	0	0	1	0.466667
1	30	1	1	0	0	0	0	0			361.218	45300	0	0	1	6	0	0	0	0	0	1	0	0	1	0	0	0	1	1	0	0	0	0	0	0.433333
1	27	1	1	0	0	0	0	0			491.213	6970	0	0	1	6	0	0	0	0	0	1	0	0	1	0	0	0	1	1	0	0	0	0	0	1.16667
1	36	1	1	0	0	0	0	0			153	283000	0	1	1	6	0	0	0	0	0	1	0	0	1	0	0	0	1	1	0	0	0	0	0	2.56667
1	29	1	1	0	0	0	0	0			1199.92	15700	0	0	0	6	0	0	0	0	0	1	0	0	1	0	0	0	1	1	0	0	0	0	0	5.6
1	22	1	1	0	0	0	0	0			523.92	346000	0	0	0	6	0	0	0	0	0	1	0	0	1	0	0	0	1	0	1	1	0	0	0	1.16667
1	50	1	1	0	0	0	0	0			484.484	404000	0	0	1	6	0	0	0	0	0	1	0	0	1	0	0	0	1	1	0	0	0	0	0	0.466667
1	21	1	1	0	0	0	0	0			72.8028	279000	0	1	1	6	0	0	0	0	0	1	0	0	1	0	0	0	1	1	0	0	0	0	0	0.466667
1	24	1	1	0	0	0	0	0			305.368	34200	0	0	1	6	0	0	0	0	0	1	0	0	1	0	0	0	1	1	0	0	0	0	0	0.466667
1	48	1	1	0	0	0	0	0			354.046	259000	0	0	1	6	0	0	0	0	0	1	0	0	1	0	0	0	1	1	0	0	0	0	0	2.8
1	28	1	1	0	0	0	0	0			384.186	13500	0	0	1	6	0	0	0	0	0	1	0	0	1	0	0	0	1	1	0	0	0	0	0	0.466667
1	34	1	1	0	0	0	0	0			319.427	68500	0	0	1	6	0	0	0	0	0	1	0	0	1	0	0	0	0	0	0	0	0	0	0	6
1	25	1	1	0	0	0	0	0			291.161	445000	0	0	1	6	0	0	0	0	0	1	0	0	1	0	0	0	1	1	0	0	0	0	0	0.466667
1	30	1	1	0	0	0	0	0			249.288	15000	0	0	1	6	0	0	0	0	0	1	0	0	1	0	0	0	1	1	0	0	0	0	0	0.466667
1	29	1	1	0	0	0	0	0			274.704	151000	0	0	1	6	0	0	0	0	0	1	0	0	1	0	0	0	1	1	0	0	0	0	0	0.466667
1	22	1	1	0	0	0	0	0			72.5676	201000	0	1	1	6	0	0	0	0	0	1	0	0	1	0	0	0	1	0	1	1	0	0	0	5.2
1	31	1	1	0	0	0	0	0			172.973	34900	0	1	1	6	0	0	0	0	0	1	0	0	1	0	0	0	1	1	0	0	0	0	0	0.466667
1	31	1	1	0	0	0	0	0			24.0393	565000	1	1	1	6	0	0	0	0	0	1	0	0	1	0	0	0	1	1	0	0	0	0	0	0.433333
1	42	1	1	0	0	0	0	0			169.002	81300	0	1	1	6	0	0	0	0	0	1	0	0	1	0	0	0	0	0	0	0	0	0	0	6
1	43	1	1	0	0	0	0	0			412.728	58300	0	0	1	6	0	0	0	0	0	1	0	0	1	0	0	0	0	0	0	0	0	0	0	6
1	47	1	1	0	0	0	0	0			16.5088	108000	1	1	1	6	0	0	0	0	0	1	0	0	1	0	0	0	1	1	0	0	0	0	0	0.3
1	26	1	1	0	0	0	0	0			374.661	45900	0	0	1	6	0	0	0	0	0	1	0	0	1	0	0	0	0	0	0	0	0	0	0	6
1	32	1	1	0	0	0	0	0			459.574	1920	0	0	1	6	0	0	0	0	0	1	0	0	1	0	0	0	1	1	0	0	0	0	0	2.06667
1	31	1	1	0	0	0	0	0			405.308	140000	0	0	1	6	0	0	0	0	0	1	0	0	1	0	0	0	1	1	0	0	0	0	0	0.466667
1	29	1	1	0	0	0	0	0			306.478	61800	0	0	1	6	0	0	0	0	0	1	0	0	1	0	0	0	0	0	0	0	0	0	0	6
1	46	1	1	0	0	0	0	0			321.567	98200	0	0	1	6	0	0	0	0	0	1	0	0	1	0	0	0	1	1	0	0	0	0	0	5.43333
1	24	1	1	0	0	0	0	0			610.932	>10000000	0	0	0	6	0	0	0	0	0	1	0	0	0	1	0	0	1	1	0	0	0	0	0	0.9
1	19	1	1	0	0	0	0	0			145.454	64700	1	1	1	0.1	0	0	0	0	0	1	0	0	1	0	0	0	1	0	1	0	1	0	0	0.1
1	24	1	1	0	0	0	0	0			789.961	6890	0	0	0	6	0	0	0	0	0	1	0	0	1	0	0	0	0	0	0	0	0	0	0	6
1	30	1	1	0	0	0	0	0			431.714	182000	0	0	1	6	0	0	0	0	0	1	0	0	1	0	0	0	0	0	0	0	0	0	0	6
1	46	1	1	0	0	0	0	0			194.285	602000	0	1	1	6	0	0	0	0	0	1	0	0	1	0	0	0	1	1	0	0	0	0	0	0.4
1	34	1	1	0	0	0	0	0			68.0336	105000	1	1	1	6	0	0	0	0	0	1	0	0	1	0	0	0	1	1	0	0	0	0	0	0.0666667
1	40	1	1	0	0	0	0	0			123.572	185000	0	1	1	6	0	0	0	0	0	1	0	0	1	0	0	0	1	1	0	0	0	0	0	0.933333
1	37	1	1	0	0	0	0	0			23.7144	207000	1	1	1	6	0	0	0	0	0	1	0	0	1	0	0	0	1	1	0	0	0	0	0	4.7
1	22	1	1	0	0	0	0	0			381.78	115000	0	0	1	6	0	0	0	0	0	1	0	0	1	0	0	0	1	1	0	0	0	0	0	0.633333
1	43	1	1	0	0	0	0	0			49.248	310000	1	1	1	6	0	0	0	0	0	1	0	0	1	0	0	0	1	1	0	0	0	0	0	4.43333
1	43	1	1	0	0	0	0	0			37.932	145000	0	1	1	6	0	0	0	0	0	1	0	0	1	0	0	0	0	0	0	0	0	0	0	6
1	24	1	1	0	0	0	0	0			224.928	99700	0	0	1	6	0	0	0	0	0	1	0	0	1	0	0	0	1	1	0	0	0	0	0	0.333333
1	59	1	1	0	0	0	0	0			133.529	200000	1	1	1	6	0	0	0	0	0	1	0	0	1	0	0	0	1	1	0	0	0	0	0	0.3
1	29	1	1	0	0	0	0	1			384.611	82400	0	0	1	6	0	0	0	0	0	1	0	0	1	0	0	0	1	1	0	0	0	0	0	1.4
1	33	1	1	0	0	0	0	0			336.532	148000	0	0	1	6	0	0	0	0	0	1	0	0	1	0	0	0	1	1	0	0	0	0	0	0.7
1	25	1	1	0	0	0	0	0			49.132	241000	0	1	1	6	0	0	0	0	0	1	0	0	1	0	0	0	1	1	0	0	0	0	0	0.466667
1	44	1	1	0	0	0	0	0			31.317	116000	1	1	1	6	0	0	0	0	0	1	0	0	1	0	0	0	1	1	0	0	0	0	0	0.3
1	20	1	1	0	0	0	0	0			215.662	14000	0	0	1	6	0	0	0	0	0	1	0	0	1	0	0	0	0	0	0	0	0	0	0	6
1	56	1	1	0	0	0	0	1			272.138	204000	0	0	1	6	0	0	0	0	0	1	0	0	1	0	0	0	0	0	0	0	0	0	0	6
1	35	1	1	0	0	0	0	0			368.859	2730	0	0	1	6	0	0	0	0	0	1	0	0	1	0	0	0	1	1	0	0	0	0	0	5.83333
1	35	0	0	1	0	0	1	0			558.875	1500	0	0	0	6	0	0	0	0	0	1	0	0	1	0	0	0	0	0	0	0	0	0	0	6
1	34	1	1	0	0	0	0	0			465.863	35300	0	0	1	6	0	0	0	0	0	1	0	0	1	0	0	0	1	1	0	0	0	0	0	0.466667
1	27	0	0	1	0	0	0	0			264.38	161000	0	0	1	6	0	0	0	0	0	1	0	0	0	0	1	0	1	1	0	0	0	0	0	3.26667
1	21	1	1	0	0	0	0	0			393.815	20900	0	0	1	6	0	0	0	0	0	1	0	0	1	0	0	0	0	0	0	0	0	0	0	6
1	33	1	1	0	0	0	0	0			576.946	23900	0	0	0	6	0	0	0	0	0	1	0	0	1	0	0	0	1	1	0	0	0	0	0	0.633333
1	41	1	1	0	0	0	0	0			376.151	4120	0	0	1	6	0	0	0	0	0	1	0	0	1	0	0	0	0	0	0	0	0	0	0	6
1	25	1	1	0	0	0	0	1			263.399	182000	0	0	1	6	0	0	0	0	0	1	0	0	1	0	0	0	1	1	0	0	0	0	0	3.26667
1	30	1	1	0	0	0	0	0			362.036	19600	0	0	1	4.9	0	0	0	0	0	1	0	0	0	0	1	0	1	0	1	1	0	0	0	2.33333
1	25	1	1	0	0	0	0	0			204.309	220000	0	0	1	6	0	0	0	0	0	1	0	0	1	0	0	0	1	1	0	0	0	0	0	2.7
1	25	1	1	0	0	0	0	0			172.746	37000	0	1	1	0.466667	0	0	0	0	0	1	0	0	1	0	0	1	0	0	0	0	0	0	0	0.5
1	26	1	1	0	0	0	0	0			406.991	680	0	0	1	6	0	0	0	0	0	1	0	0	1	0	0	0	1	1	0	0	0	0	0	0.466667
1	26	1	1	0	0	0	0	0			194.024	10200	0	1	1	6	0	0	0	0	0	1	0	0	1	0	0	0	1	1	0	0	0	0	0	0.4
1	30	1	1	0	0	0	0	0			15.84	36400	1	1	1	6	0	0	0	0	0	1	0	0	1	0	0	0	1	1	0	0	0	0	0	3.13333
1	28	1	1	0	0	0	0	0			685.083	124000	0	0	0	6	0	0	0	0	0	1	0	0	1	0	0	0	1	1	0	0	0	0	0	0.466667
1	29	1	1	0	0	0	0	0			293.353	25200	0	0	1	6	0	0	0	0	0	1	0	0	1	0	0	0	1	1	0	0	0	0	0	0.466667
1	28	1	1	0	0	0	0	0			594.449	14700	0	0	0	6	0	0	0	0	0	1	0	0	1	0	0	0	0	0	0	0	0	0	0	6
1	43	1	1	0	0	0	0	0			453.622	14800	0	0	1	6	0	0	0	0	0	1	0	0	1	0	0	0	1	1	0	0	0	0	0	0.466667
1	26	1	1	0	0	0	0	0			369.205	30500	0	0	1	6	0	0	0	0	0	1	0	0	1	0	0	0	1	1	0	0	0	0	0	0.466667
1	22	1	1	0	0	0	0	0			262.683	1390000	0	0	1	6	0	0	0	0	0	1	0	0	1	0	0	0	1	1	0	0	0	0	0	2.03333
1	23	1	1	0	0	0	0	0			401.238	92000	0	0	1	6	0	0	0	0	0	1	0	0	1	0	0	0	0	0	0	0	0	0	0	6
1	34	1	1	0	0	0	0	0			475.494	7680	0	0	1	6	0	0	0	0	0	1	0	0	1	0	0	0	1	1	0	0	0	0	0	0.533333
1	28	1	1	0	0	0	0	0			638.724	44000	0	0	0	6	0	0	0	0	0	1	0	0	1	0	0	0	1	1	0	0	0	0	0	0.466667
1	27	1	1	0	0	0	0	0			350.079	13500	0	0	1	6	0	0	0	0	0	1	0	0	1	0	0	0	1	1	0	0	0	0	0	0.4
1	24	1	1	0	0	0	0	1			486.567	26100	0	0	1	6	0	0	0	0	0	1	0	0	1	0	0	0	0	0	0	0	0	0	0	6
1	25	1	1	0	0	0	0	0			529.589	13800	0	0	0	3.73333	0	0	0	0	0	1	0	0	1	0	0	0	1	0	1	0	1	0	0	3.7
1	37	1	1	0	0	0	0	0			23.0356	157000	0	1	1	6	0	0	0	0	0	1	0	0	1	0	0	0	0	0	0	0	0	0	0	6
1	20	1	1	0	0	0	0	0			235.045	20800	0	0	1	6	0	0	0	0	0	1	0	0	1	0	0	0	1	1	0	0	0	0	0	2.03333
1	49	1	1	0	0	0	0	0			679.963	34200	0	0	0	6	0	0	0	0	0	1	0	0	1	0	0	0	1	1	0	0	0	0	0	3.03333
1	48	1	1	0	0	0	0	0			28.364	374000	1	1	1	1.73333	0	0	0	0	0	1	0	0	1	0	0	0	1	0	1	0	1	0	0	1.7
1	48	1	1	0	0	0	0	0			216.82	160000	0	0	1	6	0	0	0	0	0	1	0	0	1	0	0	0	0	0	0	0	0	0	0	6
1	22	1	1	0	0	0	0	0			299.095	98500	0	0	1	1.23333	0	0	0	0	0	1	0	0	1	0	0	0	1	0	1	0	1	0	0	1.2
1	28	1	1	0	0	0	0	0			399.105	9670	0	0	1	6	0	0	0	0	0	1	0	0	1	0	0	0	1	1	0	0	0	0	0	0.533333
1	29	1	1	0	0	0	0	0			476.6	15500	0	0	1	6	0	0	0	0	0	1	0	0	1	0	0	0	1	1	0	0	0	0	0	0.466667
1	36	1	1	0	0	0	0	0			452.052	33400	0	0	1	6	0	0	0	0	0	1	0	0	1	0	0	0	0	0	0	0	0	0	0	6
1	27	1	1	0	0	0	0	0			196.716	21400000	0	1	1	6	0	0	0	0	0	1	0	0	1	0	0	0	1	1	0	0	0	0	0	0.7
1	51	1	1	0	0	0	0	0			22.0952	85900	0	1	1	6	0	0	0	0	0	1	0	0	1	0	0	0	1	1	0	0	0	0	0	1.7
1	32	1	1	0	0	0	0	0			169.298	137000	0	1	1	6	0	0	0	0	0	1	0	0	1	0	0	0	1	1	0	0	0	0	0	0.466667
1	25	1	1	0	0	0	0	0			637.437	10500	0	0	0	6	0	0	0	0	0	1	0	0	1	0	0	0	1	0	1	1	0	0	0	0.933333
1	23	1	1	0	0	0	0	0			219.067	84300	0	0	1	6	0	0	0	0	0	1	0	0	1	0	0	0	1	1	0	0	0	0	0	0.433333
1	46	1	1	0	0	0	0	0			464.508	37700	0	0	1	6	0	0	0	0	0	1	0	0	1	0	0	0	0	0	0	0	0	0	0	6
1	35	1	1	0	0	0	0	0			238.896	37000	0	0	1	6	0	0	0	0	0	1	0	0	1	0	0	0	1	1	0	0	0	0	0	1.4
1	27	1	1	0	0	0	0	0			296.694	71300	0	0	1	6	0	0	0	0	0	1	0	0	1	0	0	0	1	1	0	0	0	0	0	0.466667
1	23	1	1	0	0	0	0	0			514.483	70500	0	0	0	6	0	0	0	0	0	1	0	0	1	0	0	0	1	1	0	0	0	0	0	0.466667
1	28	1	1	0	0	0	0	0			387.013	116000	0	0	1	6	0	0	0	0	0	1	0	0	1	0	0	0	1	1	0	0	0	0	0	0.933333
1	25	1	1	0	0	0	0	0			183.648	511000	0	1	1	6	0	0	0	0	0	1	0	0	1	0	0	0	0	0	0	0	0	0	0	6
1	23	1	1	0	0	0	0	0			74.6496	>10000000	0	1	1	0.933333	0	0	0	0	0	1	0	0	1	0	0	0	1	0	1	0	1	0	0	0.9
1	23	1	1	0	0	0	0	0			435.795	512000	0	0	1	6	0	0	0	0	0	1	0	0	0	1	0	0	1	1	0	0	0	0	0	1
1	42	1	1	0	0	0	0	0			286.474	309	0	0	1	6	0	0	0	0	0	1	0	0	1	0	0	0	0	0	0	0	0	0	0	6
1	33	1	1	0	0	0	1	0			234.433	884000	0	0	1	6	0	0	0	0	0	1	0	0	1	0	0	0	0	0	0	0	0	0	0	6
1	33	1	1	0	0	0	1	0			61.965	666000	0	1	1	6	0	0	0	0	0	1	0	0	1	0	0	0	1	1	0	0	0	0	0	1.4
1	42	1	1	0	0	0	0	0			675.465	59200	0	0	0	6	0	0	0	0	0	1	0	0	1	0	0	0	1	1	0	0	0	0	0	0.466667
1	27	1	1	0	0	0	0	1			484.315	188000	0	0	1	6	0	0	0	0	0	1	0	0	1	0	0	0	0	0	0	0	0	0	0	6
1	31	1	1	0	0	0	0	0			506.124	39400	0	0	0	6	0	0	0	0	0	1	0	0	1	0	0	0	1	1	0	0	0	0	0	0.466667
1	42	1	1	0	0	0	1	0			110	49384	0	1	1	6	0	0	0	0	0	1	0	0	1	0	0	0	1	1	0	0	0	0	0	3.46667
1	20	1	1	0	0	0	0	0			88.902	>1000000	0	1	1	6	0	0	0	0	0	1	0	0	1	0	0	0	1	1	0	0	0	0	0	0.733333
1	33	1	1	0	0	0	0	0			285.245	34400	0	0	1	6	0	0	0	0	0	1	0	0	1	0	0	0	1	1	0	0	0	0	0	1.7
1	25	1	1	0	0	0	0	0			457.983	95500	0	0	1	6	0	0	0	0	0	1	0	0	1	0	0	0	0	0	0	0	0	0	0	6
1	29	1	1	0	0	0	0	0			147.84	127000	0	1	1	6	0	0	0	0	0	1	0	0	1	0	0	0	1	1	0	0	0	0	0	0.466667
1	39	1	1	0	0	0	1	0			594.776	122000	0	0	0	6	0	0	0	0	0	1	0	0	1	0	0	0	1	0	0	0	0	0	1	0.466667
1	47	1	1	0	0	0	0	0			368.151	14400	0	0	1	6	0	0	0	0	0	1	0	0	1	0	0	0	1	1	0	0	0	0	0	2.1
1	31	1	1	0	0	0	0	0			727.2	401	0	0	0	6	0	0	0	0	0	1	0	0	1	0	0	0	1	1	0	0	0	0	0	0.7
1	49	1	1	0	0	0	1	0			426.4	35100	0	0	1	6	0	0	0	0	0	1	0	0	1	0	0	0	1	1	0	0	0	0	0	0.933333
1	34	1	1	0	0	0	1	0			209.715	106000	0	0	1	6	0	0	0	0	0	1	0	0	1	0	0	0	1	1	0	0	0	0	0	1.16667
1	33	1	1	0	0	0	0	0			238.85	1500000	0	0	1	6	0	0	0	0	0	1	0	0	1	0	0	0	1	1	0	0	0	0	0	0.466667
1	41	1	1	0	0	0	0	0			57.33	143000	1	1	1	6	0	0	0	0	0	1	0	0	1	0	0	0	1	1	0	0	0	0	0	0.8
1	47	1	1	0	0	0	0	0			96.3036	550000	0	1	1	6	0	0	0	0	0	1	0	0	1	0	0	0	1	1	0	0	0	0	0	2.13333
1	30	1	1	0	0	0	0	1			397.901	45500	0	0	1	6	0	0	0	0	0	1	0	0	1	0	0	0	1	1	0	0	0	0	0	0.533333
1	30	1	1	0	0	0	0	0			270.567	53100	0	0	1	6	0	0	0	0	0	1	0	0	1	0	0	0	0	0	0	0	0	0	0	6
1	27	1	1	0	0	0	0	0			346.853	53500	0	0	1	0.466667	0	0	0	0	0	1	0	0	1	0	0	0	1	0	1	0	1	0	0	0.5
1	38	1	1	0	0	0	1	0			398.684	12000	0	0	1	6	0	0	0	0	0	1	0	0	1	0	0	0	1	1	0	0	0	0	0	0.933333
1	36	1	1	0	0	0	0	0			132.94	177000	0	1	1	6	0	0	0	0	0	1	0	0	1	0	0	0	1	0	0	0	0	0	1	0.866667
1	31	1	1	0	0	0	0	1			130.345	91500	0	1	1	6	0	0	0	0	0	1	0	0	1	0	0	0	0	0	0	0	0	0	0	6
1	31	0	1	0	0	0	0	0			531.006	24600	0	0	0	6	0	0	0	0	0	1	0	0	1	0	0	0	1	1	0	0	0	0	0	1.2
1	40	1	1	0	0	0	0	0			621.135	21400	0	0	0	6	0	0	0	0	0	1	0	0	1	0	0	0	1	1	0	0	0	0	0	0.466667
1	25	1	1	0	0	0	0	0			350.886	18500	0	0	1	6	0	0	0	0	0	1	0	0	1	0	0	0	1	1	0	0	0	0	0	0.466667
1	47	1	0	1	0	0	0	0			13.11	285000	0	1	1	6	0	0	0	0	0	1	0	0	1	0	0	0	1	1	0	0	0	0	0	0.933333
1	25	1	1	0	0	0	0	0			243.264	45400	0	0	1	6	0	0	0	0	0	1	0	0	1	0	0	0	1	1	0	0	0	0	0	0.466667
1	25	1	1	0	0	0	0	0			19.56	223000	1	1	1	2.96667	0	0	0	0	0	1	0	0	1	0	0	0	1	0	1	1	0	0	0	1.33333
1	23	1	1	0	0	0	0	0			353.641	16700	0	0	1	6	0	0	0	0	0	1	0	0	1	0	0	0	1	1	0	0	0	0	0	0.466667
1	41	1	1	0	0	0	0	0			1010.68	9100	0	0	0	6	0	0	0	0	0	1	0	0	1	0	0	0	1	1	0	0	0	0	0	1.1
1	32	0	1	0	0	0	0	0			76	110000	0	1	1	6	0	0	0	0	0	1	0	0	1	0	0	0	0	0	0	0	0	0	0	6
1	31	1	1	0	0	0	0	0			76.311	337000	0	1	1	6	0	0	0	0	0	1	0	0	1	0	0	0	1	0	1	1	0	0	0	5.5
1	29	1	1	0	0	0	0	0			341	13106	0	0	1	6	0	0	0	0	0	1	0	0	1	0	0	0	1	1	0	0	0	0	0	0.466667
1	32	1	1	0	0	0	0	0			418.883	61300	0	0	1	6	0	0	0	0	0	1	0	0	1	0	0	0	1	1	0	0	0	0	0	0.933333
1	34	1	1	0	0	0	0	0			303.943	1200000	0	0	1	6	0	0	0	0	0	1	0	0	1	0	0	0	1	1	0	0	0	0	0	0.466667
1	39	1	1	0	0	0	0	0			29.7904	584000	0	1	1	6	0	0	0	0	0	1	0	0	1	0	0	0	1	1	0	0	0	0	0	0.466667
1	59	0	0	1	0	0	0	0			210.983	111000	0	0	1	6	0	0	0	0	0	1	0	0	1	0	0	0	1	0	0	0	0	0	1	3.73333
1	49	1	0	0	1	0	0	1			393.901	13900	0	0	1	1.4	0	0	0	0	0	1	0	0	1	0	0	0	1	0	1	0	1	0	0	1.4
1	40	1	1	0	0	0	0	0			56.0224	369000	0	1	1	6	0	0	0	0	0	1	0	0	0	0	1	0	1	1	0	0	0	0	0	0.9
1	37	1	1	0	0	0	0	0			20.6944	1420000	0	1	1	6	0	0	0	0	0	1	0	0	0	0	1	0	1	0	0	0	0	0	1	0.433333
1	35	1	1	0	0	0	0	0			502.02	48800	0	0	0	6	0	0	0	0	0	1	0	0	1	0	0	0	1	1	0	0	0	0	0	0.466667
1	30	1	1	0	0	0	0	0			133.325	32400	0	1	1	6	0	0	0	0	0	1	0	0	1	0	0	0	0	0	0	0	0	0	0	6
1	50	1	0	0	1	0	0	1			348	7827	0	0	1	6	0	0	0	0	0	0	1	0	1	0	0	0	0	0	0	0	0	0	0	6
1	45	1	1	0	0	0	0	0			449.918	19800	0	0	1	6	0	0	0	0	0	0	1	0	1	0	0	0	0	0	0	0	0	0	0	6
1	48	1	1	0	0	0	0	1			258.622	9060	0	0	1	6	0	0	0	0	0	0	1	0	1	0	0	0	0	0	0	0	0	0	0	6
1	20	1	1	0	0	0	0	0			392.73	454000	0	0	1	6	0	0	0	0	0	0	1	0	1	0	0	0	0	0	0	0	0	0	0	6
1	26	1	1	0	0	0	0	0			260.707	60600	0	0	1	6	0	0	0	0	0	0	1	0	1	0	0	0	1	0	1	1	0	0	0	1.16667
1	25	1	1	0	0	0	0	0			335.717	77800	0	0	1	6	0	0	0	0	0	0	1	0	1	0	0	0	1	1	0	0	0	0	0	0.466667
1	32	1	1	0	0	0	0	1			347.844	25500	0	0	1	6	0	0	0	0	0	0	1	0	1	0	0	0	1	1	0	0	0	0	0	0.233333
1	39	0	0	1	0	0	0	0			393.613	16400	0	0	1	6	0	0	0	0	0	0	1	0	1	0	0	0	0	0	0	0	0	0	0	6
1	36	1	1	0	0	0	1	0			205.8	55300	0	0	1	6	0	0	0	0	0	0	1	0	1	0	0	0	0	0	0	0	0	0	0	6
1	26	1	1	0	0	0	0	0			125.568	7470000	0	1	1	6	0	0	0	0	0	0	1	0	1	0	0	0	1	1	0	0	0	0	0	0.133333
1	27	1	1	0	0	0	0	0			308.438	25100	0	0	1	6	0	0	0	0	0	0	1	0	1	0	0	0	1	1	0	0	0	0	0	0.366667
1	45	1	1	0	0	0	0	0			141.494	48100	1	1	1	6	0	0	0	0	0	0	1	0	0	0	1	0	1	0	0	0	0	1	0	3.5
1	30	1	1	0	0	0	0	0			324.8	29300	0	0	1	6	0	0	0	0	0	0	1	0	1	0	0	0	1	1	0	0	0	0	0	0.366667
1	41	1	1	0	0	0	0	0			40.56	188000	1	1	1	6	0	0	0	0	0	0	1	0	1	0	0	0	0	0	0	0	0	0	0	6
1	28	1	1	0	0	0	0	0			432.432	19000	0	0	1	6	0	0	0	0	0	0	1	0	1	0	0	0	1	1	0	0	0	0	0	0.466667
1	24	1	1	0	0	0	0	0			252.22	93300	0	0	1	6	0	0	0	0	0	0	1	0	1	0	0	0	0	0	0	0	0	0	0	6
1	25	1	1	0	0	0	0	0			450.45	35800	0	0	1	6	0	0	0	0	0	0	1	0	1	0	0	0	0	0	0	0	0	0	0	6
1	29	1	1	0	0	0	0	0			176.563	40500	0	1	1	6	0	0	0	0	0	0	1	0	1	0	0	0	0	0	0	0	0	0	0	6
1	25	1	1	0	0	0	0	0			464.091	127000	0	0	1	6	0	0	0	0	0	0	1	0	1	0	0	0	0	0	0	0	0	0	0	6
1	42	1	1	0	0	0	0	0			335.248	30900	0	0	1	6	0	0	0	0	0	0	1	0	1	0	0	0	0	0	0	0	0	0	0	6
1	40	1	0	0	1	0	0	1			354.672	64100	0	0	1	6	0	0	0	0	0	0	1	0	1	0	0	0	1	1	0	0	0	0	0	1.4
1	24	1	1	0	0	0	0	0			136.188	82800	0	1	1	6	0	0	0	0	0	0	1	0	1	0	0	0	0	0	0	0	0	0	0	6
1	23	1	1	0	0	0	0	0			551.532	51100	0	0	0	6	0	0	0	0	0	0	1	0	1	0	0	0	1	1	0	0	0	0	0	0.233333
1	44	1	1	0	0	0	0	0			55.605	607000	0	1	1	6	0	0	0	0	0	0	1	0	1	0	0	0	0	0	0	0	0	0	0	6
1	24	1	1	0	0	0	0	0			283.392	28800	0	0	1	6	0	0	0	0	0	0	1	0	1	0	0	0	0	0	0	0	0	0	0	6
1	32	1	1	0	0	0	0	0			534.351	71300	0	0	0	6	0	0	0	0	0	0	1	0	1	0	0	0	0	0	0	0	0	0	0	6
1	28	1	1	0	0	0	0	0			317.7	114000	0	0	1	6	0	0	0	0	0	0	1	0	1	0	0	0	1	1	0	0	0	0	0	0.7
1	29	1	1	0	0	0	0	0			19.9872	97000	0	1	1	6	0	0	0	0	0	0	1	0	1	0	0	0	1	0	1	1	0	0	0	3.9
1	26	1	1	0	0	0	0	0			501.124	58900	0	0	0	6	0	0	0	0	0	0	1	0	1	0	0	0	0	0	0	0	0	0	0	6
1	27	1	1	0	0	0	0	0			431.68	156000	0	0	1	6	0	0	0	0	0	0	1	0	1	0	0	0	1	1	0	0	0	0	0	1.43333
1	29	1	1	0	0	0	0	0			148.255	9210	0	1	1	6	0	0	0	0	0	0	1	0	1	0	0	0	0	0	0	0	0	0	0	6
1	30	1	1	0	0	0	0	0			165.197	56700	0	1	1	6	0	0	0	0	0	0	1	0	1	0	0	0	0	0	0	0	0	0	0	6
1	39	1	1	0	0	0	0	0			467.921	56700	0	0	1	6	0	0	0	0	0	0	1	0	1	0	0	0	1	1	0	0	0	0	0	0.5
1	27	1	1	0	0	0	0	0			271.998	68000	0	0	1	6	0	0	0	0	0	0	1	0	1	0	0	0	0	0	0	0	0	0	0	6
1	25	1	1	0	0	0	0	0			524.619	2210	0	0	0	6	0	0	0	0	0	0	1	0	1	0	0	0	0	0	0	0	0	0	0	6
1	29	1	1	0	0	0	0	0			635.976	39600	0	0	0	6	0	0	0	0	0	0	1	0	1	0	0	0	0	0	0	0	0	0	0	6
1	31	1	1	0	0	0	0	0			584.82	95400	0	0	0	6	0	0	0	0	0	0	1	0	1	0	0	0	0	0	0	0	0	0	0	6
1	47	1	1	0	0	0	0	0			362.993	20600	0	0	1	6	0	0	0	0	0	0	1	0	1	0	0	0	0	0	0	0	0	0	0	6
1	27	1	1	0	0	0	0	0			385.466	104000	0	0	1	6	0	0	0	0	0	0	1	0	1	0	0	0	0	0	0	0	0	0	0	6
1	28	1	1	0	0	0	0	0			400.158	156000	0	0	1	6	0	0	0	0	0	0	1	0	1	0	0	0	0	0	0	0	0	0	0	6
1	47	1	1	0	0	0	0	0			18.7488	92400	1	1	1	6	0	0	0	0	0	0	1	0	1	0	0	0	0	0	0	0	0	0	0	6
1	21	1	1	0	0	0	0	0			90.519	>10000000	0	1	1	6	0	0	0	0	0	0	1	0	1	0	0	0	1	1	0	0	0	0	0	0.5
1	23	1	1	0	0	0	0	0			393.515	108000	0	0	1	6	0	0	0	0	0	0	1	0	1	0	0	0	0	0	0	0	0	0	0	6
1	27	1	1	0	0	0	0	1			567.96	44000	0	0	0	6	0	0	0	0	0	0	1	0	1	0	0	0	0	0	0	0	0	0	0	6
1	27	1	1	0	0	0	0	0			763.295	19300	0	0	0	6	0	0	0	0	0	0	1	0	1	0	0	0	0	0	0	0	0	0	0	6
1	22	1	1	0	0	0	0	0			240.1	3830000	0	0	1	6	0	0	0	0	0	0	1	0	1	0	0	0	0	0	0	0	0	0	0	6
1	35	1	1	0	0	0	0	0			488.16	65000	0	0	1	6	0	0	0	0	0	0	1	0	1	0	0	0	1	0	1	1	0	0	0	0.466667
1	36	1	1	0	0	0	0	0			243.243	1850000	0	0	1	6	0	0	0	0	0	0	1	0	1	0	0	0	1	1	0	0	0	0	0	0.466667
1	25	1	1	0	0	0	0	0			441.504	281000	0	0	1	6	0	0	0	0	0	0	1	0	1	0	0	0	1	1	0	0	0	0	0	0.466667
1	34	1	1	0	0	0	0	0			507.18	19700	0	0	0	6	0	0	0	0	0	0	1	0	1	0	0	0	0	0	0	0	0	0	0	6
1	43	1	1	0	0	0	0	0			622.743	7820000	0	0	0	6	0	0	0	0	0	0	1	0	1	0	0	0	0	0	0	0	0	0	0	6
1	36	1	1	0	0	0	0	0			242.207	36100	0	0	1	6	0	0	0	0	0	0	1	0	1	0	0	0	0	0	0	0	0	0	0	6
1	51	1	1	0	0	0	0	0			423.225	39400	0	0	1	6	0	0	0	0	0	0	1	0	1	0	0	0	0	0	0	0	0	0	0	6
1	41	1	1	0	0	0	0	0			187.136	1210000	0	1	1	6	0	0	0	0	0	0	1	0	1	0	0	0	1	1	0	0	0	0	0	0.466667
1	30	1	1	0	0	0	0	0			327.854	18300	0	0	1	6	0	0	0	0	0	0	1	0	1	0	0	0	1	1	0	0	0	0	0	1.16667
1	30	1	1	0	0	0	0	1			337.904	411000	0	0	1	6	0	0	0	0	0	0	1	0	1	0	0	0	1	1	0	0	0	0	0	0.466667
1	29	1	1	0	0	0	0	0			352.135	84800	0	0	1	6	0	0	0	0	0	0	1	0	1	0	0	0	0	0	0	0	0	0	0	6
1	40	1	1	0	0	0	0	0			492.364	33500	0	0	1	6	0	0	0	0	0	0	1	0	1	0	0	0	1	1	0	0	0	0	0	0.466667
1	31	1	1	0	0	0	0	0			718.263	70100	0	0	0	6	0	0	0	0	0	0	1	0	1	0	0	0	1	1	0	0	0	0	0	0.3
1	41	1	1	0	0	0	1	0			84.581	108000	1	1	1	6	0	0	0	0	0	0	1	0	1	0	0	0	0	0	0	0	0	0	0	6
1	24	1	1	0	0	0	0	0			1001.8	1290	0	0	0	6	0	0	0	0	0	0	1	0	1	0	0	0	0	0	0	0	0	0	0	6
1	30	1	1	0	0	0	0	0			1004.85	10700	0	0	0	6	0	0	0	0	0	0	1	0	1	0	0	0	0	0	0	0	0	0	0	6
1	23	1	1	0	0	0	0	0			643.853	4830	0	0	0	6	0	0	0	0	0	0	1	0	1	0	0	0	0	0	0	0	0	0	0	6
1	33	1	1	0	0	0	1	0			44.4612	54600	0	1	1	6	0	0	0	0	0	0	1	0	1	0	0	0	0	0	0	0	0	0	0	6
1	30	1	1	0	0	0	0	0			282.24	74800	0	0	1	6	0	0	0	0	0	0	1	0	1	0	0	0	1	1	0	0	0	0	0	0.966667
1	38	1	1	0	0	0	0	0			550.454	41800	0	0	0	6	0	0	0	0	0	0	1	0	1	0	0	0	0	0	0	0	0	0	0	6
1	33	1	1	0	0	0	0	0			393.75	142000	0	0	1	6	0	0	0	0	0	0	1	0	1	0	0	0	1	1	0	0	0	0	0	0.566667
1	26	1	1	0	0	0	0	0			882.145	3430	0	0	0	6	0	0	0	0	0	0	1	0	1	0	0	0	0	0	0	0	0	0	0	6
1	37	1	1	0	0	0	0	0			702.374	45200	0	0	0	6	0	0	0	0	0	0	1	0	1	0	0	0	1	1	0	0	0	0	0	0.466667
1	26	1	1	0	0	0	0	0			427.715	42600	0	0	1	6	0	0	0	0	0	0	1	0	1	0	0	0	0	0	0	0	0	0	0	6
1	25	1	1	0	0	0	0	0			526.038	55000	0	0	0	6	0	0	0	0	0	0	1	0	1	0	0	0	1	1	0	0	0	0	0	0.433333
1	28	1	1	0	0	0	1	0			310.727	313000	0	0	1	6	0	0	0	0	0	0	1	0	1	0	0	0	1	1	0	0	0	0	0	0.2
1	31	1	1	0	0	0	0	0			456.057	54200	0	0	1	6	0	0	0	0	0	0	1	0	1	0	0	0	0	0	0	0	0	0	0	6
1	32	1	1	0	0	0	0	0			88.6608	1970000	0	1	1	6	0	0	0	0	0	0	1	0	1	0	0	0	0	0	0	0	0	0	0	6
1	41	1	1	0	0	0	0	0			235.411	54700	0	0	1	6	0	0	0	0	0	0	1	0	1	0	0	0	0	0	0	0	0	0	0	6
1	42	1	1	0	0	0	0	0			443.151	26600	0	0	1	6	0	0	0	0	0	0	1	0	1	0	0	0	0	0	0	0	0	0	0	6
1	27	1	1	0	0	0	0	0			239.659	235000	0	0	1	6	0	0	0	0	0	0	1	0	1	0	0	0	1	1	0	0	0	0	0	0.633333
1	31	1	1	0	0	0	0	0			654.15	27500	0	0	0	6	0	0	0	0	0	0	1	0	1	0	0	0	1	1	0	0	0	0	0	0.466667
1	29	0	0	1	0	0	0	0			4.13	602000	0	1	1	6	0	0	0	0	0	0	1	0	1	0	0	0	0	0	0	0	0	0	0	6
1	34	1	1	0	0	0	1	0			72.884	208000	0	1	1	6	0	0	0	0	0	0	1	0	1	0	0	0	0	0	0	0	0	0	0	6
1	32	1	1	0	0	0	0	0			594.944	39500	0	0	0	6	0	0	0	0	0	0	1	0	1	0	0	0	0	0	0	0	0	0	0	6
1	40	1	1	0	0	0	0	0			535.837	40600	0	0	0	6	0	0	0	0	0	0	1	0	1	0	0	0	0	0	0	0	0	0	0	6
1	32	1	1	0	0	0	0	0			1197.2	28900	0	0	0	6	0	0	0	0	0	0	1	0	1	0	0	0	0	0	0	0	0	0	0	6
1	39	1	0	0	1	0	1	1			266.49	44300	0	0	1	6	0	0	0	0	0	0	1	0	1	0	0	0	0	0	0	0	0	0	0	6
1	32	1	1	0	0	0	0	0			61.218	20300	0	1	1	6	0	0	0	0	0	0	1	0	1	0	0	0	0	0	0	0	0	0	0	6
1	22	1	1	0	0	0	0	0			324.272	126000	0	0	1	6	0	0	0	0	0	0	1	0	1	0	0	0	0	0	0	0	0	0	0	6
1	40	1	1	0	0	0	0	0			186.149	102000	0	1	1	6	0	0	0	0	0	0	1	0	1	0	0	0	0	0	0	0	0	0	0	6
1	23	1	1	0	0	0	0	0			546.218	5860	0	0	0	6	0	0	0	0	0	0	1	0	1	0	0	0	0	0	0	0	0	0	0	6
1	21	1	1	0	0	0	0	0			625.808	4690	0	0	0	6	0	0	0	0	0	0	1	0	1	0	0	0	0	0	0	0	0	0	0	6
1	40	1	1	0	0	0	1	0			321.797	81400	0	0	1	6	0	0	0	0	0	0	1	0	1	0	0	0	0	0	0	0	0	0	0	6
1	30	1	1	0	0	0	0	0			417.2	10100	0	0	1	6	0	0	0	0	0	0	1	0	1	0	0	0	0	0	0	0	0	0	0	6
1	35	1	1	0	0	0	0	0			338.664	46100	0	0	1	6	0	0	0	0	0	0	1	0	1	0	0	0	1	1	0	0	0	0	0	5.6
1	30	1	1	0	0	0	0	0			164.916	120000	0	1	1	6	0	0	0	0	0	0	1	0	1	0	0	0	0	0	0	0	0	0	0	6
1	42	1	1	0	0	0	0	0			62.244	72600	0	1	1	6	0	0	0	0	0	0	1	0	1	0	0	0	1	0	1	1	0	0	0	1.16667
1	31	1	1	0	0	0	0	0			220.616	665000	0	0	1	6	0	0	0	0	0	0	1	0	1	0	0	0	0	0	0	0	0	0	0	6
1	24	1	1	0	0	0	0	0			486.265	4070000	0	0	1	6	0	0	0	0	0	0	1	0	1	0	0	0	0	0	0	0	0	0	0	6
1	27	1	1	0	0	0	0	0			598.5	13800	0	0	0	6	0	0	0	0	0	0	1	0	1	0	0	0	0	0	0	0	0	0	0	6
1	37	1	1	0	0	0	0	0			494.669	49600	0	0	1	6	0	0	0	0	0	0	1	0	1	0	0	0	0	0	0	0	0	0	0	6
1	35	1	1	0	0	0	0	0			193.533	214000	0	1	1	6	0	0	0	0	0	0	1	0	1	0	0	0	1	1	0	0	0	0	0	0.6
1	30	1	1	0	0	0	0	0			789.525	13300	0	0	0	6	0	0	0	0	0	0	1	0	1	0	0	0	1	1	0	0	0	0	0	0.366667
1	31	1	1	0	0	0	0	0			464.768	108000	0	0	1	6	0	0	0	0	0	0	1	0	1	0	0	0	0	0	0	0	0	0	0	6
1	28	1	1	0	0	0	0	0			195.371	784000	0	1	1	6	0	0	0	0	0	0	1	0	1	0	0	0	0	0	0	0	0	0	0	6
1	41	1	1	0	0	0	0	0			236.465	204000	0	0	1	6	0	0	0	0	0	0	1	0	1	0	0	0	0	0	0	0	0	0	0	6
1	24	1	1	0	0	0	0	0			694.83	37600	0	0	0	6	0	0	0	0	0	0	1	0	1	0	0	0	0	0	0	0	0	0	0	6
1	27	1	1	0	0	0	0	0			701.784	53500	0	0	0	6	0	0	0	0	0	0	1	0	1	0	0	0	1	1	0	0	0	0	0	0.466667
1	30	1	1	0	0	0	0	0			354.962	155000	0	0	1	6	0	0	0	0	0	0	1	0	1	0	0	0	0	0	0	0	0	0	0	6
1	24	1	1	0	0	0	0	0			295.455	21800	0	0	1	6	0	0	0	0	0	0	1	0	1	0	0	0	0	0	0	0	0	0	0	6
1	21	1	1	0	0	0	0	0			209.804	2390000	0	0	1	6	0	0	0	0	0	0	1	0	1	0	0	0	0	0	0	0	0	0	0	6
1	25	1	1	0	0	0	0	0			541.724	7210	0	0	0	6	0	0	0	0	0	0	1	0	1	0	0	0	0	0	0	0	0	0	0	6
1	43	1	0	0	0	1	0	0			7.476	1470000	1	1	1	6	0	0	0	0	0	0	1	0	1	0	0	0	0	0	0	0	0	0	0	6
1	27	1	1	0	0	0	0	0			452.057	8530	0	0	1	6	0	0	0	0	0	0	1	0	1	0	0	0	1	1	0	0	0	0	0	0.433333
1	29	1	1	0	0	0	0	0			266.25	217000	0	0	1	6	0	0	0	0	0	0	1	0	1	0	0	0	0	0	0	0	0	0	0	6
1	26	1	1	0	0	0	0	0			118.877	238000	0	1	1	6	0	0	0	0	0	0	1	0	1	0	0	0	1	0	0	0	0	0	1	3.73333
1	55	0	0	1	0	0	0	0			215.974	67800	0	0	1	6	0	0	0	0	0	0	1	0	1	0	0	0	0	0	0	0	0	0	0	6
1	34	1	1	0	0	0	0	0			335.213	1870000	0	0	1	6	0	0	0	0	0	0	1	0	1	0	0	0	0	0	0	0	0	0	0	6
1	37	1	1	0	0	0	1	0			62.814	112000	0	1	1	6	0	0	0	0	0	0	1	0	1	0	0	0	0	0	0	0	0	0	0	6
1	37	1	1	0	0	0	0	0			304.247	65200	0	0	1	6	0	0	0	0	0	0	1	0	1	0	0	0	0	0	0	0	0	0	0	6
1	25	1	1	0	0	0	0	0			200	<100	0	0	1	6	0	0	0	0	0	0	1	0	1	0	0	0	0	0	0	0	0	0	0	6
1	35	1	0	1	0	0	0	0			71.3232	70200	0	1	1	6	0	0	0	0	0	0	1	0	1	0	0	0	0	0	0	0	0	0	0	6
1	56	1	1	0	0	0	1	0			31.365	2740000	1	1	1	6	0	0	0	0	0	0	1	0	1	0	0	0	0	0	0	0	0	0	0	6
1	35	1	1	0	0	0	0	0			34.56	367000	1	1	1	6	0	0	0	0	0	0	1	0	1	0	0	0	0	0	0	0	0	0	0	6
1	26	1	1	0	0	0	0	0			208.278	69300	0	0	1	6	0	0	0	0	0	0	1	0	1	0	0	0	0	0	0	0	0	0	0	6
1	25	1	1	0	0	0	0	0			255.753	12900	0	0	1	6	0	0	0	0	0	0	1	0	1	0	0	0	0	0	0	0	0	0	0	6
1	31	1	1	0	0	0	0	0			11.2962	204000	0	1	1	6	0	0	0	0	0	0	1	0	1	0	0	0	1	1	0	0	0	0	0	0.433333
1	21	1	1	0	0	0	0	0			477.843	57600	0	0	1	6	0	0	0	0	0	0	1	0	1	0	0	0	0	0	0	0	0	0	0	6
1	22	1	1	0	0	0	0	0			386.083	103000	0	0	1	6	0	0	0	0	0	0	1	0	1	0	0	0	0	0	0	0	0	0	0	6
1	41	1	1	0	0	0	0	0			676.512	44800	0	0	0	6	0	0	0	0	0	0	1	0	1	0	0	0	0	0	0	0	0	0	0	6
1	35	1	1	0	0	0	1	0			85.2096	442000	0	1	1	6	0	0	0	0	0	0	1	0	1	0	0	0	0	0	0	0	0	0	0	6
1	25	1	1	0	0	0	0	0			344.85	32100	0	0	1	6	0	0	0	0	0	0	1	0	1	0	0	0	0	0	0	0	0	0	0	6
1	24	1	1	0	0	0	0	0			464.31	77100	0	0	1	6	0	0	0	0	0	0	1	0	1	0	0	0	0	0	0	0	0	0	0	6
1	31	1	1	0	0	0	0	0			376.329	4980000	0	0	1	6	0	0	0	0	0	0	1	0	1	0	0	0	0	0	0	0	0	0	0	6
1	23	1	1	0	0	0	0	0			429.752	73000	0	0	1	6	0	0	0	0	0	0	1	0	1	0	0	0	1	1	0	0	0	0	0	0.7
1	49	1	1	0	0	0	0	0			3	900000	0	1	1	6	0	0	0	0	0	0	1	0	1	0	0	0	1	1	0	0	0	0	0	0.233333
1	33	1	1	0	0	0	0	0			473.335	7620	0	0	1	6	0	0	0	0	0	0	1	0	1	0	0	0	0	0	0	0	0	0	0	6
1	32	1	1	0	0	0	0	0			22.1056	24400	0	1	1	6	0	0	0	0	0	0	1	0	1	0	0	0	0	0	0	0	0	0	0	6
1	46	1	1	0	0	0	0	0			19.4331	30900	0	1	1	6	0	0	0	0	0	0	1	0	1	0	0	0	0	0	0	0	0	0	0	6
1	27	1	1	0	0	0	0	0			265.636	16800	0	0	1	6	0	0	0	0	0	0	1	0	1	0	0	0	0	0	0	0	0	0	0	6
1	21	1	1	0	0	0	0	0			225.655	83000	0	0	1	6	0	0	0	0	0	0	1	0	1	0	0	0	0	0	0	0	0	0	0	6
1	43	1	1	0	0	0	0	0			256.09	33400	0	0	1	6	0	0	0	0	0	0	1	0	1	0	0	0	0	0	0	0	0	0	0	6
1	25	1	1	0	0	0	1	0			429.66	27500	0	0	1	6	0	0	0	0	0	0	1	0	1	0	0	0	0	0	0	0	0	0	0	6
1	39	1	1	0	0	0	0	0			173.317	1890000	0	1	1	6	0	0	0	0	0	0	1	0	1	0	0	0	1	0	1	1	0	0	0	0.933333
1	31	1	1	0	0	0	0	1			67.1055	587000	0	1	1	6	0	0	0	0	0	0	1	0	1	0	0	0	0	0	0	0	0	0	0	6
1	45	0	0	1	0	0	0	0			338.083	8970	0	0	1	6	0	0	0	0	0	0	1	0	1	0	0	0	0	0	0	0	0	0	0	6
1	46	1	1	0	0	0	0	0			661.451	120	0	0	0	6	0	0	0	0	0	0	1	0	1	0	0	0	0	0	0	0	0	0	0	6
1	45	1	1	0	0	0	0	0			498.789	72300	0	0	1	6	0	0	0	0	0	0	1	0	1	0	0	0	0	0	0	0	0	0	0	6
1	34	1	1	0	0	0	0	0			195.242	18600	0	1	1	6	0	0	0	0	0	0	1	0	1	0	0	0	0	0	0	0	0	0	0	6
1	31	1	1	0	0	0	0	0			335.439	452000	0	0	1	6	0	0	0	0	0	0	1	0	1	0	0	0	1	1	0	0	0	0	0	4.2
1	30	1	1	0	0	0	0	0			271.62	96300	0	0	1	6	0	0	0	0	0	0	1	0	1	0	0	0	0	0	0	0	0	0	0	6
1	35	1	1	0	0	0	0	0			176.457	20500	0	1	1	6	0	0	0	0	0	0	1	0	1	0	0	0	1	0	0	0	0	0	1	0.933333
1	22	1	1	0	0	0	0	0			494.52	59600	0	0	1	6	0	0	0	0	0	0	1	0	1	0	0	0	0	0	0	0	0	0	0	6
1	39	1	1	0	0	0	0	0			646.665	54700	0	0	0	6	0	0	0	0	0	0	1	0	1	0	0	0	1	1	0	0	0	0	0	0.933333
1	31	1	1	0	0	0	0	0			496.368	12600	0	0	1	6	0	0	0	0	0	0	1	0	1	0	0	0	0	0	0	0	0	0	0	6
1	32	1	1	0	0	0	0	0			887.233	35200	0	0	0	6	0	0	0	0	0	0	1	0	1	0	0	0	0	0	0	0	0	0	0	6
1	24	1	1	0	0	0	0	0			588.432	19500	0	0	0	6	0	0	0	0	0	0	1	0	1	0	0	0	0	0	0	0	0	0	0	6
1	36	1	1	0	0	0	0	0			497.49	4900	0	0	1	6	0	0	0	0	0	0	1	0	1	0	0	0	0	0	0	0	0	0	0	6
1	34	1	1	0	0	0	0	0			775.322	164000	0	0	0	6	0	0	0	0	0	0	1	0	1	0	0	0	0	0	0	0	0	0	0	6
1	22	1	1	0	0	0	0	0			78.0747	900000	0	1	1	6	0	0	0	0	0	0	1	0	1	0	0	0	0	0	0	0	0	0	0	6
1	35	1	1	0	0	0	0	0			234.8	174000	0	0	1	6	0	0	0	0	0	0	1	0	1	0	0	0	1	1	0	0	0	0	0	1
1	21	1	1	0	0	0	0	0			265.511	52600	0	0	1	6	0	0	0	0	0	0	1	0	1	0	0	0	0	0	0	0	0	0	0	6
1	27	1	1	0	0	0	0	0			295.26	69900	0	0	1	6	0	0	0	0	0	0	1	0	1	0	0	0	0	0	0	0	0	0	0	6
1	34	1	1	0	0	0	0	0			172.803	507000	0	1	1	6	0	0	0	0	0	0	1	0	1	0	0	0	0	0	0	0	0	0	0	6
1	40	1	1	0	0	0	0	0			37.471	62400	0	1	1	6	0	0	0	0	0	0	1	0	1	0	0	0	0	0	0	0	0	0	0	6
1	38	1	1	0	0	0	0	0			378.972	1960000	0	0	1	6	0	0	0	0	0	0	1	0	1	0	0	0	0	0	0	0	0	0	0	6
1	26	1	1	0	0	0	0	0			628.35	99400	0	0	0	6	0	0	0	0	0	0	1	0	1	0	0	0	1	1	0	0	0	0	0	0.633333
1	43	0	0	1	0	0	0	0			98.9901	15000	0	1	1	6	0	0	0	0	0	0	1	0	1	0	0	0	0	0	0	0	0	0	0	6
1	23	1	1	0	0	0	0	0			505.802	36500	0	0	0	6	0	0	0	0	0	0	1	0	1	0	0	0	0	0	0	0	0	0	0	6
1	29	1	1	0	0	0	0	0			340.199	68800	0	0	1	6	0	0	0	0	0	0	1	0	1	0	0	0	0	0	0	0	0	0	0	6
1	19	1	1	0	0	0	0	0			286.192	319000	0	0	1	6	0	0	0	0	0	0	1	0	1	0	0	0	1	0	1	1	0	0	0	0.6
1	30	1	1	0	0	0	0	0			408.506	8660	0	0	1	6	0	0	0	0	0	0	1	0	1	0	0	0	0	0	0	0	0	0	0	6
1	31	1	1	0	0	0	1	0			587.211	6590	0	0	0	6	0	0	0	0	0	0	0	1	1	0	0	0	1	1	0	0	0	0	0	0.333333
1	26	1	1	0	0	0	0	0			60.3896	113000	0	1	1	6	0	0	0	0	0	0	0	1	1	0	0	0	0	0	0	0	0	0	0	6
1	31	1	1	0	0	0	0	0			179.046	31200	0	1	1	6	0	0	0	0	0	0	0	1	1	0	0	0	0	0	0	0	0	0	0	6
1	30	1	1	0	0	0	0	0			41.1032	28600	0	1	1	6	0	0	0	0	0	0	0	1	1	0	0	0	0	0	0	0	0	0	0	6
1	25	1	1	0	0	0	0	0			50.568	170000	0	1	1	6	0	0	0	0	0	0	0	1	1	0	0	0	0	0	0	0	0	0	0	6
1	45	1	1	0	0	0	1	0			14.4144	303000	0	1	1	6	0	0	0	0	0	0	0	1	1	0	0	0	0	0	0	0	0	0	0	6
1	33	1	1	0	0	0	0	0			463.088	136000	0	0	1	6	0	0	0	0	0	0	0	1	1	0	0	0	0	0	0	0	0	0	0	6
1	25	0	1	0	0	0	0	0			45.325	185000	0	1	1	6	0	0	0	0	0	0	0	1	1	0	0	0	0	0	0	0	0	0	0	6
1	43	1	1	0	0	0	0	0			645.37	1400	0	0	0	6	0	0	0	0	0	0	0	1	1	0	0	0	0	0	0	0	0	0	0	6
1	39	1	1	0	0	0	0	0			769.482	3100	0	0	0	6	0	0	0	0	0	0	0	1	1	0	0	0	0	0	0	0	0	0	0	6
1	34	1	1	0	0	0	0	1			164.577	145000	0	1	1	6	0	0	0	0	0	0	0	1	1	0	0	0	0	0	0	0	0	0	0	6
1	27	1	1	0	0	0	0	0			565.474	72500	0	0	0	6	0	0	0	0	0	0	0	1	1	0	0	0	0	0	0	0	0	0	0	6
1	33	1	1	0	0	0	0	0			775.454	2040	0	0	0	6	0	0	0	0	0	0	0	1	1	0	0	0	0	0	0	0	0	0	0	6
1	28	1	1	0	0	0	0	0			408.694	10500	0	0	1	6	0	0	0	0	0	0	0	1	1	0	0	0	1	1	0	0	0	0	0	4.26667
1	34	1	1	0	0	0	0	0			312.487	16400	0	0	1	6	0	0	0	0	0	0	0	1	1	0	0	0	0	0	0	0	0	0	0	6
1	23	1	1	0	0	0	0	0			193.276	114000	0	1	1	6	0	0	0	0	0	0	0	1	1	0	0	0	0	0	0	0	0	0	0	6
1	25	1	1	0	0	0	0	0			858.348	114000	0	0	0	6	0	0	0	0	0	0	0	1	1	0	0	0	0	0	0	0	0	0	0	6
1	26	1	1	0	0	0	0	0			398.82	57200	0	0	1	6	0	0	0	0	0	0	0	1	1	0	0	0	0	0	0	0	0	0	0	6
1	29	1	1	0	0	0	0	0			134.062	16900	0	1	1	6	0	0	0	0	0	0	0	1	1	0	0	0	0	0	0	0	0	0	0	6
1	34	1	1	0	0	0	0	0			525.012	27100	0	0	0	6	0	0	0	0	0	0	0	1	1	0	0	0	0	0	0	0	0	0	0	6
1	19	1	1	0	0	0	0	0			372.128	14600	0	0	1	6	0	0	0	0	0	0	0	1	1	0	0	0	0	0	0	0	0	0	0	6
1	84	1	1	0	0	0	1	0			128.7	34000	0	1	1	6	0	0	0	0	0	0	0	1	1	0	0	0	0	0	0	0	0	0	0	6
1	41	1	1	0	0	0	0	0			50.4915	450000	0	1	1	6	0	0	0	0	0	0	0	1	1	0	0	0	0	0	0	0	0	0	0	6
1	34	1	1	0	0	0	1	0			226.24	6880	0	0	1	6	0	0	0	0	0	0	0	1	1	0	0	0	0	0	0	0	0	0	0	6
1	46	1	1	0	0	0	0	0			73.5042	1560	0	1	1	6	0	0	0	0	0	0	0	1	1	0	0	0	0	0	0	0	0	0	0	6
1	45	1	1	0	0	0	0	0			452.848	4030	0	0	1	6	0	0	0	0	0	0	0	1	1	0	0	0	1	1	0	0	0	0	0	0.466667
1	58	1	1	0	0	0	1	0			30.3584	129000	0	1	1	6	0	0	0	0	0	0	0	1	1	0	0	0	0	0	0	0	0	0	0	6
1	31	1	1	0	0	0	0	1			216.398	30500	0	0	1	6	0	0	0	0	0	0	0	1	1	0	0	0	0	0	0	0	0	0	0	6
1	50	1	1	0	0	0	0	0			297.304	53700	0	0	1	6	0	0	0	0	0	0	0	1	1	0	0	0	0	0	0	0	0	0	0	6
1	33	1	1	0	0	0	0	0			21.028	3670000	1	1	1	6	0	0	0	0	0	0	0	1	1	0	0	0	0	0	0	0	0	0	0	6
1	29	1	1	0	0	0	0	0			383.836	38100	0	0	1	6	0	0	0	0	0	0	0	1	1	0	0	0	1	1	0	0	0	0	0	0.466667
1	31	1	1	0	0	0	0	0			135.36	288000	0	1	1	6	0	0	0	0	0	0	0	1	1	0	0	0	0	0	0	0	0	0	0	6
1	31	1	1	0	0	0	0	0			542.052	30800	0	0	0	6	0	0	0	0	0	0	0	1	1	0	0	0	0	0	0	0	0	0	0	6
1	31	1	1	0	0	0	0	0			262.346	15400	0	0	1	6	0	0	0	0	0	0	0	1	1	0	0	0	0	0	0	0	0	0	0	6
1	33	1	1	0	0	0	0	0			274.592	22300	0	0	1	6	0	0	0	0	0	0	0	1	1	0	0	0	0	0	0	0	0	0	0	6
1	43	1	1	0	0	0	0	0			415.141	51500	0	0	1	6	0	0	0	0	0	0	0	1	1	0	0	0	0	0	0	0	0	0	0	6
1	35	1	1	0	0	0	0	0			356.784	9180	0	0	1	6	0	0	0	0	0	0	0	1	1	0	0	0	0	0	0	0	0	0	0	6
1	25	1	1	0	0	0	0	0			81.6192	1800000	0	1	1	6	0	0	0	0	0	0	0	1	1	0	0	0	0	0	0	0	0	0	0	6
1	20	1	1	0	0	0	0	0			212.657	25157	0	0	1	6	0	0	0	0	0	0	0	1	1	0	0	0	1	1	0	0	0	0	0	1.36667
1	37	1	1	0	0	0	0	0			382.536	150000	1	1	1	6	0	0	0	0	0	0	0	1	1	0	0	0	0	0	0	0	0	0	0	6
1	22	1	1	0	0	0	0	0			218.182	165000	0	0	1	6	0	0	0	0	0	0	0	1	1	0	0	0	0	0	0	0	0	0	0	6
1	32	1	1	0	0	0	0	0			444.312	435000	0	0	1	6	0	0	0	0	0	0	0	1	1	0	0	0	0	0	0	0	0	0	0	6
1	24	1	1	0	0	0	0	0			415.562	68100	0	0	1	6	0	0	0	0	0	0	0	1	1	0	0	0	0	0	0	0	0	0	0	6
1	33	1	1	0	0	0	0	0			329.202	21100	0	0	1	6	0	0	0	0	0	0	0	1	1	0	0	0	0	0	0	0	0	0	0	6
1	27	1	1	0	0	0	0	0			332.14	160000	0	0	1	6	0	0	0	0	0	0	0	1	1	0	0	0	0	0	0	0	0	0	0	6
1	27	1	1	0	0	0	0	0			551.905	11000	0	0	0	6	0	0	0	0	0	0	0	1	1	0	0	0	0	0	0	0	0	0	0	6
1	31	1	1	0	0	0	0	0			890.093	5180	0	0	0	6	0	0	0	0	0	0	0	1	1	0	0	0	0	0	0	0	0	0	0	6
1	37	1	1	0	0	0	0	1			344.24	9670	0	0	1	6	0	0	0	0	0	0	0	1	1	0	0	0	0	0	0	0	0	0	0	6
1	36	1	1	0	0	0	0	0			393.423	20800	0	0	1	6	0	0	0	0	0	0	0	1	1	0	0	0	0	0	0	0	0	0	0	6
1	22	1	1	0	0	0	0	0			556.265	104	0	0	0	6	0	0	0	0	0	0	0	1	1	0	0	0	0	0	0	0	0	0	0	6
1	36	1	1	0	0	0	0	0			421.411	133000	1	1	1	6	0	0	0	0	0	0	0	1	1	0	0	0	0	0	0	0	0	0	0	6
1	28	1	1	0	0	0	0	0			76.3752	25100	0	1	1	6	0	0	0	0	0	0	0	1	1	0	0	0	0	0	0	0	0	0	0	6
1	30	1	1	0	0	0	0	0			391.644	124000	0	0	1	6	0	0	0	0	0	0	0	1	1	0	0	0	0	0	0	0	0	0	0	6
1	34	1	1	0	0	0	0	0			302.541	9210	0	0	1	6	0	0	0	0	0	0	0	1	1	0	0	0	0	0	0	0	0	0	0	6
1	47	1	1	0	0	0	0	0			70.983	315000	0	1	1	6	0	0	0	0	0	0	0	1	1	0	0	0	0	0	0	0	0	0	0	6
1	24	1	1	0	0	0	0	0			15.6604	38400	0	1	1	6	0	0	0	0	0	0	0	1	1	0	0	0	0	0	0	0	0	0	0	6
1	35	1	1	0	0	0	1	0			56.55	95900	0	1	1	6	0	0	0	0	0	0	0	1	0	1	0	0	0	0	0	0	0	0	0	6
1	36	1	0	1	0	0	0	0			376.3	2470	0	0	1	6	0	0	0	0	0	0	0	1	1	0	0	0	0	0	0	0	0	0	0	6
1	19	1	1	0	0	0	0	0			300.495	122667	0	0	1	6	0	0	0	0	0	0	0	1	1	0	0	0	0	0	0	0	0	0	0	6
1	26	1	1	0	0	0	0	0			1037.74	38700	0	0	0	6	0	0	0	0	0	0	0	1	1	0	0	0	0	0	0	0	0	0	0	6
1	52	1	1	0	0	0	0	1			135.11	53600	0	1	1	6	0	0	0	0	0	0	0	1	1	0	0	0	0	0	0	0	0	0	0	6
1	38	1	1	0	0	0	0	0			188.784	180000	0	1	1	6	0	0	0	0	0	0	0	1	1	0	0	0	0	0	0	0	0	0	0	6
1	32	1	1	0	0	0	0	0			20.628	549000	0	1	1	0.9	0	0	0	0	0	0	0	1	1	0	0	1	0	0	0	0	0	0	0	0.9
1	25	1	1	0	0	0	0	0			306.072	148000	0	0	1	6	0	0	0	0	0	0	0	1	1	0	0	0	0	0	0	0	0	0	0	6
1	30	1	1	0	0	0	0	0			270.468	112000	0	0	1	6	0	0	0	0	0	0	0	1	1	0	0	0	0	0	0	0	0	0	0	6
1	30	1	1	0	0	0	0	0			248.4	103000	0	0	1	6	0	0	0	0	0	0	0	1	1	0	0	0	1	1	0	0	0	0	0	0.466667
1	20	1	1	0	0	0	0	0			710.099	25900	0	0	0	6	0	0	0	0	0	0	0	1	1	0	0	0	0	0	0	0	0	0	0	6
1	48	1	1	0	0	0	0	0			503.928	24000	0	0	0	6	0	0	0	0	0	0	0	1	1	0	0	0	0	0	0	0	0	0	0	6
1	23	1	1	0	0	0	0	0			231.831	25400	0	0	1	6	0	0	0	0	0	0	0	1	1	0	0	0	0	0	0	0	0	0	0	6
1	67	1	1	0	0	0	1	0			202.46	18519	0	0	1	6	0	0	0	0	0	0	0	1	1	0	0	0	0	0	0	0	0	0	0	6
1	39	1	1	0	0	0	0	0			303.794	271000	0	0	1	5.86667	0	0	0	0	0	0	0	1	1	0	0	0	0	0	0	0	0	0	0	5.9
1	25	1	1	0	0	0	0	1			514	151000	0	0	0	5.86667	0	0	0	0	0	0	0	1	1	0	0	0	1	1	0	0	0	0	0	0.466667
1	32	1	1	0	0	0	0	0			376.058	86400	0	0	1	5.83333	0	0	0	0	0	0	0	1	1	0	0	0	0	0	0	0	0	0	0	5.8
1	32	1	1	0	0	0	0	0			189.216	118000	0	1	1	5.7	0	0	0	0	0	0	0	1	1	0	0	0	0	0	0	0	0	0	0	5.7
1	37	1	1	0	0	0	0	0			387.903	12800	0	0	1	5.46667	0	0	0	0	0	0	0	1	1	0	0	0	0	0	0	0	0	0	0	5.5
1	44	1	1	0	0	0	0	0			31.488	171000	0	1	1	5.43333	0	0	0	0	0	0	0	1	0	0	1	0	0	0	0	0	0	0	0	5.43333
1	56	1	1	0	0	0	1	0			144.806	13300	0	1	1	5.43333	0	0	0	0	0	0	0	1	1	0	0	0	0	0	0	0	0	0	0	5.43333
1	24	1	1	0	0	0	0	0			168.948	17100000	0	1	1	5.43333	0	0	0	0	0	0	0	1	1	0	0	0	0	0	0	0	0	0	0	5.43333
1	39	1	1	0	0	0	1	0			332.85	27200	0	0	1	5.23333	0	0	0	0	0	0	0	1	1	0	0	0	0	0	0	0	0	0	0	5.23333
1	37	1	1	0	0	0	0	0			298.452	570000	0	0	1	5.23333	0	0	0	0	0	0	0	1	1	0	0	0	1	1	0	0	0	0	0	0.433333
1	48	1	1	0	0	0	0	0			498.691	64300	0	0	1	5.2	0	0	0	0	0	0	0	1	1	0	0	0	0	0	0	0	0	0	0	5.2
1	23	1	1	0	0	0	0	0			218.096	91800	0	0	1	5.03333	0	0	0	0	0	0	0	1	1	0	0	0	0	0	0	0	0	0	0	5.03333
1	27	1	1	0	0	0	0	0			272.412	73200	0	0	1	5.03333	0	0	0	0	0	0	0	1	1	0	0	0	1	1	0	0	0	0	0	0.933333
1	29	1	1	0	0	0	0	0			386.325	196000	0	0	1	5	0	0	0	0	0	0	0	1	1	0	0	0	1	1	0	0	0	0	0	0.2
1	38	1	1	0	0	0	0	0			95.04	24600	0	1	1	5.2	0	0	0	0	0	0	0	1	1	0	0	0	0	0	0	0	0	0	0	5.2
1	28	1	1	0	0	0	0	0			4.0081	920000	0	1	1	5.03333	0	0	0	0	0	0	0	1	1	0	0	0	0	0	0	0	0	0	0	5.03333
1	49	1	1	0	0	0	0	0			53.3205	72900	0	1	1	5.2	0	0	0	0	0	0	0	1	1	0	0	0	0	0	0	0	0	0	0	5.2
1	25	1	1	0	0	0	0	0			361.56	15800	0	0	1	5.03333	0	0	0	0	0	0	0	1	1	0	0	0	0	0	0	0	0	0	0	5.03333
1	35	1	1	0	0	0	0	0			124.925	284000	1	1	1	5.2	0	0	0	0	0	0	0	1	1	0	0	0	0	0	0	0	0	0	0	5.2
1	21	1	1	0	0	0	0	0			252.48	39300	0	0	1	5.03333	0	0	0	0	0	0	0	1	1	0	0	0	0	0	0	0	0	0	0	5.03333
1	68	1	1	0	0	0	1	0	8	1830000	8	1830000	1	1	1	6	1	0	0	0	0	0	0	0	1	0	0	0	0	0	0	0	0	0	0	6
1	51	1	1	0	0	0	0	0	17	324000	17	324000	0	1	1	6	1	0	0	0	0	0	0	0	1	0	0	0	0	0	0	0	0	0	0	6
1	28	1	1	0	0	0	0	0	25	484000	25	484000	0	1	1	6	1	0	0	0	0	0	0	0	1	0	0	0	0	0	0	0	0	0	0	6
1	32	1	1	0	0	0	0	0	186	1030000	186	1030000	0	1	1	6	1	0	0	0	0	0	0	0	1	0	0	0	0	0	0	0	0	0	0	6
1	72	1	0	1	0	0	0	0	28	1300000	179	255	0	1	1	6	1	0	0	0	0	0	0	0	1	0	0	0	1	1	0	0	0	0	0	0.9
1	39	1	0	1	0	0	1	0	254	69600	483	1610	0	0	1	6	1	0	0	0	0	0	0	0	0	1	0	0	0	0	0	0	0	0	0	6
1	26	1	0	1	0	0	0	0	321	397	321	397	0	0	1	6	1	0	0	0	0	0	0	0	1	0	0	0	0	0	0	0	0	0	0	6
1	26	1	1	0	0	0	0	0	158	430000	380	1130	0	0	1	6	1	0	0	0	0	0	0	0	0	1	0	0	0	0	0	0	0	0	0	6
1	24	1	1	0	0	0	0	0	406	143000	406	143000	0	0	1	6	1	0	0	0	0	0	0	0	1	0	0	0	1	1	0	0	0	0	0	1.96667
1	32	1	1	0	0	0	1	0	214	511	214	511	0	0	1	6	1	0	0	0	0	0	0	0	1	0	0	0	0	0	0	0	0	0	0	6
1	23	1	1	0	0	0	0	0	438	1580000	729	30100	0	0	0	6	1	0	0	0	0	0	0	0	1	0	0	0	1	1	0	0	0	0	0	4.86667
1	29	1	1	0	0	0	1	0	416	61100	416	61100	0	0	1	6	1	0	0	0	0	0	0	0	1	0	0	0	0	0	0	0	0	0	0	6
1	41	1	1	0	0	0	1	0	56	2720000	328	1780	0	0	1	6	1	0	0	0	0	0	0	0	1	0	0	0	0	0	0	0	0	0	0	6
1	25	1	1	0	0	0	0	0	338	6580	396	75	0	0	1	6	1	0	0	0	0	0	0	0	0	1	0	0	0	0	0	0	0	0	0	6
1	27	1	1	0	0	0	0	0	10	98200	10	98200	0	1	1	6	1	0	0	0	0	0	0	0	1	0	0	0	0	0	0	0	0	0	0	6
1	25	1	1	0	0	0	0	0	292	18100	550	181	0	0	0	6	1	0	0	0	0	0	0	0	1	0	0	0	0	0	0	0	0	0	0	6
1	25	1	1	0	0	0	0	0	20	392000	20	392000	0	1	1	6	0	1	0	0	0	0	0	0	1	0	0	0	0	0	0	0	0	0	0	6
1	37	1	0	1	0	0	0	0	54	73000	54	73000	0	1	1	6	0	1	0	0	0	0	0	0	1	0	0	0	0	0	0	0	0	0	0	6
1	26	1	1	0	0	0	0	0	809	6480000	66	6480000	0	1	1	6	0	1	0	0	0	0	0	0	1	0	0	0	0	0	0	0	0	0	0	6
1	56	1	0	1	0	0	0	0	26	384000	188	2030	0	1	1	6	0	1	0	0	0	0	0	0	1	0	0	0	0	0	0	0	0	0	0	6
1	20	1	1	0	0	0	0	0	280	167000	436	807	0	0	1	6	0	1	0	0	0	0	0	0	1	0	0	0	0	0	0	0	0	0	0	6
1	25	1	1	0	0	0	1	0	472	27800	609	667	0	0	0	6	0	1	0	0	0	0	0	0	1	0	0	0	0	0	0	0	0	0	0	6
1	23	1	1	0	0	0	0	0	659	68300	776	25	0	0	0	6	0	1	0	0	0	0	0	0	0	0	1	0	0	0	0	0	0	0	0	6
1	23	1	1	0	0	0	1	0	308	71000	576	694	0	0	0	6	0	1	0	0	0	0	0	0	1	0	0	0	0	0	0	0	0	0	0	6
1	27	1	1	0	0	0	0	0	194	121000	526	1380	0	0	0	6	0	1	0	0	0	0	0	0	0	1	0	0	0	0	0	0	0	0	0	6
1	23	1	1	0	0	0	0	0	900	18800	900	18800	0	0	0	6	0	1	0	0	0	0	0	0	1	0	0	0	0	0	0	0	0	0	0	6
1	23	1	1	0	0	0	0	0	192	27600	262	130	0	0	1	6	0	1	0	0	0	0	0	0	0	1	0	0	0	0	0	0	0	0	0	6
1	25	1	1	0	0	0	0	0	304	28100	446	31	0	0	1	6	0	1	0	0	0	0	0	0	1	0	0	0	0	0	0	0	0	0	0	6
1	22	1	1	0	0	0	0	0	120	12400	262	148	0	0	1	6	0	0	1	0	0	0	0	0	1	0	0	0	0	0	0	0	0	0	0	6
1	23	1	1	0	0	0	0	0	326	898000	394	477	0	0	1	6	0	0	1	0	0	0	0	0	1	0	0	0	0	0	0	0	0	0	0	6
1	31	1	1	0	0	0	1	0	40	143000	90	323	0	1	1	6	0	0	1	0	0	0	0	0	0	1	0	0	0	0	0	0	0	0	0	6
1	60	1	0	1	0	0	0	0	4	452000	96	346	1	1	1	6	0	0	1	0	0	0	0	0	1	0	0	0	0	0	0	0	0	0	0	6
1	30	1	1	0	0	0	0	0	144	436000	462	41	0	0	1	6	0	0	1	0	0	0	0	0	0	0	1	0	0	0	0	0	0	0	0	6
1	21	1	1	0	0	0	0	0	290	191	290	191	0	0	1	6	0	0	1	0	0	0	0	0	1	0	0	0	1	1	0	0	0	0	0	0.3
1	22	1	1	0	0	0	0	0	212	258000	338	2320	0	0	1	6	0	0	1	0	0	0	0	0	1	0	0	0	0	0	0	0	0	0	0	6
1	35	1	0	1	0	0	0	0	530	40400	502	1420	0	0	0	6	0	0	1	0	0	0	0	0	0	1	0	0	0	0	0	0	0	0	0	6
1	31	1	1	0	0	0	0	0	96	367000	618	430	0	0	0	6	0	0	1	0	0	0	0	0	0	1	0	0	0	0	0	0	0	0	0	6
1	23	1	1	0	0	0	0	1	1438		1438		0	0	0	6	0	0	1	0	0	0	0	0	1	0	0	0	0	0	0	0	0	0	0	6
1	58	1	1	0	0	0	0	0	40	41600	40	41600	0	1	1	6	0	0	1	0	0	0	0	0	1	0	0	0	1	1	0	0	0	0	0	0.366667
1	26	1	1	0	0	0	0	0	222	15500	222	15500	0	0	1	6	0	0	1	0	0	0	0	0	1	0	0	0	1	1	0	0	0	0	0	0.4
1	44	1	1	0	0	0	0	0	164	81900	164	81900	0	1	1	6	0	0	1	0	0	0	0	0	1	0	0	0	1	1	0	0	0	0	0	0.0666667
1	29	1	1	0	0	0	0	0	548	56600	552	233	0	0	0	6	0	0	1	0	0	0	0	0	1	0	0	0	0	0	0	0	0	0	0	6
1	22	1	1	0	0	0	0	0	465	174000	465	174000	1	1	1	6	0	0	1	0	0	0	0	0	1	0	0	0	1	1	0	0	0	0	0	2
1	28	1	1	0	0	0	0	0	34	1520000	34	1520000	1	1	1	6	0	0	1	0	0	0	0	0	1	0	0	0	0	0	0	0	0	0	0	6
1	26	1	1	0	0	0	0	0	215	725000	215	725000	0	0	1	6	0	0	0	1	0	0	0	0	1	0	0	0	0	0	0	0	0	0	0	6
1	31	1	1	0	0	0	0	0	222	31800	222	31800	0	0	1	6	0	0	0	1	0	0	0	0	1	0	0	0	0	0	0	0	0	0	0	6
1	23	1	1	0	0	0	0	0			174	36300	0	1	1	6	0	0	0	1	0	0	0	0	1	0	0	0	0	0	0	0	0	0	0	6
1	23	1	1	0	0	0	0	0	288	126000	288	126000	0	0	1	6	0	0	0	1	0	0	0	0	1	0	0	0	1	1	0	0	0	0	0	0.4
1	29	1	1	0	0	0	0	0	432	703000	432	703000	0	0	1	6	0	0	0	1	0	0	0	0	1	0	0	0	0	0	0	0	0	0	0	6
1	23	1	1	0	0	0	0	0	214	227000	214	227000	0	0	1	6	0	0	0	1	0	0	0	0	1	0	0	0	0	0	0	0	0	0	0	6
1	21	1	1	0	0	0	0	0	652	414000	652	414000	0	0	0	6	0	0	0	1	0	0	0	0	1	0	0	0	0	0	0	0	0	0	0	6
1	43	1	1	0	0	0	0	0	96	256000	174	439	0	1	1	6	0	0	0	1	0	0	0	0	1	0	0	0	0	0	0	0	0	0	0	6
1	26	1	1	0	0	0	0	0	194	2240000	194	2240000	0	1	1	6	0	0	0	1	0	0	0	0	1	0	0	0	1	1	0	0	0	0	0	1.36667
1	23	1	1	0	0	0	0	0	522	6010	365	237	0	0	1	6	0	0	0	1	0	0	0	0	1	0	0	0	0	0	0	0	0	0	0	6
1	24	1	1	0	0	0	0	0	480	6270000	480	6270000	0	0	1	6	0	0	0	1	0	0	0	0	1	0	0	0	1	1	0	0	0	0	0	3.16667
1	29	1	1	0	0	0	0	0	26	87900	80	222	0	1	1	6	0	0	0	1	0	0	0	0	1	0	0	0	0	0	0	0	0	0	0	6
1	27	1	1	0	0	0	0	0	408		408		0	0	1	6	0	0	0	1	0	0	0	0	1	0	0	0	0	0	0	0	0	0	0	6
1	22	1	1	0	0	0	0	0	441	40700	441	40700	0	0	1	6	0	0	0	1	0	0	0	0	1	0	0	0	0	0	0	0	0	0	0	6
1	24	1	1	0	0	0	0	0	366	99400	552	292	0	0	0	6	0	0	0	1	0	0	0	0	1	0	0	0	0	0	0	0	0	0	0	6
1	47	1	1	0	0	0	0	0	42	4000000	42	4000000	1	1	1	6	0	0	0	1	0	0	0	0	1	0	0	0	0	0	0	0	0	0	0	6
1	22	1	1	0	0	0	0	0	360	2360	360	2360	0	0	1	6	0	0	0	1	0	0	0	0	1	0	0	0	0	0	0	0	0	0	0	6
1	25	1	1	0	0	0	0	0	310	6890	402	32	0	0	1	6	0	0	0	1	0	0	0	0	1	0	0	0	0	0	0	0	0	0	0	6
1	22	1	0	1	0	0	0	0	234	12300	238	116	0	0	1	6	0	0	0	1	0	0	0	0	1	0	0	0	0	0	0	0	0	0	0	6
1	38	1	1	0	0	0	0	0	302	41900	302	41900	1	1	1	6	0	0	0	1	0	0	0	0	1	0	0	0	0	0	0	0	0	0	0	6
1	23	1	1	0	0	0	0	0	364	660	364	660	0	0	1	6	0	0	0	1	0	0	0	0	1	0	0	0	0	0	0	0	0	0	0	6
1	33	1	1	0	0	0	0	0	48	10000000	48	10000000	0	1	1	6	0	0	0	1	0	0	0	0	1	0	0	0	0	0	0	0	0	0	0	6
1	38	1	0	1	0	0	0	0	704	78700	704	78700	0	0	0	6	0	0	0	1	0	0	0	0	1	0	0	0	1	0	0	0	0	1	0	0.333333
1	29	1	1	0	0	0	0	0	13	99800	12	99800	1	1	1	6	0	0	0	0	1	0	0	0	1	0	0	0	0	0	0	0	0	0	0	6
1	53	1	1	0	0	0	0	0	405	8670000	319	8670000	0	0	1	6	0	0	0	0	1	0	0	0	0	0	1	0	0	0	0	0	0	0	0	6
1	26	1	1	0	0	0	0	0	180	172000	180	172000	0	1	1	6	0	0	0	0	1	0	0	0	1	0	0	0	1	0	0	0	0	1	0	5.93333
1	29	1	1	0	0	0	0	0	592	23600	669	65400	0	0	0	6	0	0	0	0	1	0	0	0	1	0	0	0	0	0	0	0	0	0	0	6
1	30	1	1	0	0	0	0	0	35	565000	61	565000	1	1	1	6	0	0	0	0	1	0	0	0	0	1	0	0	0	0	0	0	0	0	0	6
1	29	1	1	0	0	0	0	0	718	12300	718	12300	0	0	0	6	0	0	0	0	1	0	0	0	1	0	0	0	0	0	0	0	0	0	0	6
1	31	1	1	0	0	0	0	0	560	51000	560	51000	0	0	0	6	0	0	0	0	1	0	0	0	1	0	0	0	1	1	0	0	0	0	0	0.166667
1	34	1	1	0	0	0	0	0	322	41500	322	41500	0	0	1	6	0	0	0	0	1	0	0	0	1	0	0	0	0	0	0	0	0	0	0	6
1	38	1	1	0	0	0	0	0	298	123000	298	123000	0	0	1	6	0	0	0	0	1	0	0	0	1	0	0	0	0	0	0	0	0	0	0	6
1	26	1	1	0	0	0	0	0	480	84500	454	99000	0	0	1	6	0	0	0	0	1	0	0	0	1	0	0	0	1	1	0	0	0	0	0	0.4
1	20	1	1	0	0	0	0	0	359	656000	359	656000	0	0	1	6	0	0	0	0	0	1	0	0	1	0	0	0	1	0	0	0	0	1	0	5.73333
1	23	1	1	0	0	0	0	0	434	59200	434	59200	0	0	1	6	0	0	0	0	0	1	0	0	1	0	0	0	1	0	0	0	0	1	0	3.6
1	27	1	1	0	0	0	0	0	658	71100	400	66900	0	0	1	6	0	0	0	0	0	1	0	0	1	0	0	0	1	0	0	0	0	1	0	4.9
1	22	1	1	0	0	0	0	0	58	188000	58	188000	0	1	1	6	0	0	0	0	0	1	0	0	1	0	0	0	1	0	0	0	0	1	0	3.63333
1	28	1	1	0	0	0	0	0	20	915000	20	915000	0	1	1	6	0	0	0	0	0	1	0	0	1	0	0	0	1	0	0	0	0	1	0	2.8
1	49	1	1	0	0	0	1	0	36	1540000	46	4310000	0	1	1	6	0	0	0	0	0	1	0	0	1	0	0	0	1	0	0	0	0	1	0	0.133333
1	24	1	1	0	0	0	0	0	368	185000	368	185000	0	0	1	6	0	0	0	0	0	0	1	0	1	0	0	0	0	0	0	0	0	0	0	6
1	24	1	1	0	0	0	0	0	418	31400	418	31400	0	0	1	6	0	0	0	0	0	1	0	0	1	0	0	0	0	0	0	0	0	0	0	6
1	29	1	1	0	0	0	0	0	443	18400	443	18400	0	0	1	6	0	0	0	0	0	1	0	0	1	0	0	0	0	0	0	0	0	0	0	6
1	30	1	1	0	0	0	0	0	8	1180000	8	1180000	1	1	1	6	0	0	0	0	0	1	0	0	1	0	0	0	1	0	1	1	0	0	0	3.56667
1	61	0	0	1	0	0	0	0	32	138000	32	138000	1	1	1	6	0	0	0	0	0	1	0	0	0	0	1	0	0	0	0	0	0	0	0	6
1	22	1	1	0	0	0	0	0	228	145000	228	145000	0	0	1	6	0	0	0	0	0	1	0	0	1	0	0	0	1	1	0	0	0	0	0	2.1
1	30	1	1	0	0	0	0	1	426	484000	544	415000	0	0	0	6	0	0	0	0	0	0	1	0	0	0	1	0	1	0	0	0	0	1	0	0.966667
1	29	1	1	0	0	0	0	0	411	6720000	411	6720000	1	1	1	6	0	0	0	0	0	0	1	0	1	0	0	0	0	0	0	0	0	0	0	6
1	23	1	1	0	0	0	0	0	145	17600	145	17600	0	1	1	6	0	0	0	0	0	0	1	0	1	0	0	0	0	0	0	0	0	0	0	6
1	35	1	1	0	0	0	0	0	297	916000	297	916000	0	0	1	6	0	0	0	0	0	0	1	0	1	0	0	0	1	0	0	0	0	1	0	2.43333
1	27	1	1	0	0	0	0	0	392	65400	416	257	0	0	1	6	0	0	0	0	0	0	1	0	1	0	0	0	0	0	0	0	0	0	0	6
1	23	1	1	0	0	0	0	0	660	231000	660	231000	0	0	0	6	0	0	0	0	0	0	1	0	1	0	0	0	0	0	0	0	0	0	0	6
1	20	1	1	0	0	0	0	0	344	8110	344	8110	0	0	1	6	0	0	0	0	0	0	1	0	1	0	0	0	1	1	0	0	0	0	0	0.466667
1	36	1	1	0	0	0	0	0	415	63600	136	692	0	1	1	6	0	0	0	0	0	0	1	0	1	0	0	0	1	0	0	0	0	1	0	2.36667
1	39	1	0	0	1	0	0	0	414	6220	414	6220	0	0	1	6	0	0	0	0	0	0	1	0	1	0	0	0	0	0	0	0	0	0	0	6
1	31	1	1	0	0	0	1	0	118	215000	118	215000	1	1	1	6	0	0	0	0	0	0	1	0	0	1	0	0	0	0	0	0	0	0	0	6
1	22	1	1	0	0	0	0	0	290	1663000	290	1663000	0	0	1	6	0	0	0	0	0	0	1	0	1	0	0	0	1	1	0	0	0	0	0	0.466667
1	25	1	1	0	0	0	0	0	181	2797000	181	2797000	0	1	1	6	0	0	0	0	0	0	1	0	1	0	0	0	0	0	0	0	0	0	0	6
1	47	1	1	0	0	0	0	0	18	263200	18	263200	1	1	1	6	0	0	0	0	0	0	0	1	0	0	1	0	0	0	0	0	0	0	0	6
1	22	1	1	0	0	0	0	0	578	2400	578	2400	0	0	0	6	0	0	0	0	0	0	0	1	1	0	0	0	1	1	0	0	0	0	0	0.466667
1	26	1	1	0	0	0	0	0	366	52710	366	52710	0	0	1	6	0	0	0	0	0	0	0	1	1	0	0	0	0	0	0	0	0	0	0	6
1	20	1	1	0	0	0	0	0	254	22140	254	22140	0	0	1	6	0	0	0	0	0	0	0	1	1	0	0	0	0	0	0	0	0	0	0	6
1	39	1	1	0	0	0	0	0	40	283700	40	283700	1	1	1	6	0	0	0	0	0	0	0	1	0	1	0	0	0	0	0	0	0	0	0	6
1	45	1	1	0	0	0	0	0	122	211700	122	211700	0	1	1	6	0	0	0	0	0	0	0	1	1	0	0	0	0	0	0	0	0	0	0	6
1	26	1	1	0	0	0	0	0	644	54400	181	97950	0	1	1	6	0	0	0	0	0	0	0	1	1	0	0	0	1	0	0	0	0	1	0	0.266667
1	23	1	1	0	0	0	0	0	309	175200	309	175200	0	0	1	6	0	0	0	0	0	0	0	1	1	0	0	0	1	0	0	0	0	1	0	2.8
1	23	1	1	0	0	0	0	0	524	259	524	259	0	0	0	6	0	0	0	0	0	0	0	1	1	0	0	0	1	1	0	0	0	0	0	0.233333
1	23	1	1	0	0	0	0	0	500	695200	500	695200	0	0	0	6	0	0	0	0	0	0	0	1	1	0	0	0	1	1	0	0	0	0	0	0.233333
1	39	1	1	0	0	0	0	0	39	79640	39	79640	1	1	1	6	0	0	0	0	0	0	0	1	1	0	0	0	0	0	0	0	0	0	0	6
1	20	1	1	0	0	0	0	0	54	82100	54	82100	1	1	1	6	0	0	0	0	0	0	0	1	1	0	0	0	0	0	0	0	0	0	0	6
1	28	1	1	0	0	0	0	1	36	448900	36	448900	1	1	1	5.73333	0	0	0	0	0	0	0	1	1	0	0	0	0	0	0	0	0	0	0	5.73333
1	23	1	1	0	0	0	0	0	243	112900	243	112900	0	0	1	5.26667	0	0	0	0	0	0	0	1	1	0	0	0	0	0	0	0	0	0	0	5.26667
1	21	1	1	0	0	0	0	0	207	1244000	207	1244000	0	0	1	5.43333	0	0	0	0	0	0	0	1	1	0	0	0	1	0	0	0	0	1	0	0.5
1	34	1	1	0	0	0	0	0	366	72980	366	72980	1	1	1	5.23333	0	0	0	0	0	0	0	1	1	0	0	0	0	0	0	0	0	0	0	5.3
1	28	1	1	0	0	0	0	0	4	878000	4	878000	1	1	1	6	0	0	0	0	0	1	0	0	1	0	0	0	1	0	0	0	0	1	0	0.466667
1	27	1	1	0	0	0	0	0	371	12100	371	12100	0	0	1	6	0	0	1	0	0	0	0	0	1	0	0	0	0	0	0	0	0	0	0	6
1	18.6056	1	1	0	0	0	0	0	298	890000	298	890000	0	0	1	6	0	0	0	0	0	0	0	1	1	0	0	0	1	1	0	0	0	0	0	1.4
1	19.7111	1	1	0	0	0	0	0	245	9000	245	9000	0	0	1	6	0	0	0	0	0	0	0	1	1	0	0	0	1	1	0	0	0	0	0	0.466667
1	19.9528	1	1	0	0	0	0	0	469	86000	469	86000	0	0	1	6	0	0	0	0	0	0	0	1	1	0	0	0	1	0	0	0	0	1	0	0.566667
1	18.4444	1	1	0	0	0	0	0	414	134000	414	134000	0	0	1	6	0	1	0	0	0	0	0	0	1	0	0	0	0	0	0	0	0	0	0	6
1	21.1194	1	1	0	0	0	0	0	372	9300	473	28200	0	0	1	6	0	0	0	0	0	0	1	0	1	0	0	0	1	1	0	0	0	0	0	1.63333
1	21.4028	1	1	0	0	0	0	0	344	27536	344	27536	0	0	1	6	0	0	0	0	0	0	1	0	1	0	0	0	1	1	0	0	0	1	0	5.6
1	22.15	1	1	0	0	0	0	0	440	265000	440	265000	0	0	1	6	0	0	0	0	0	0	1	0	1	0	0	0	1	0	0	0	0	1	0	3.96667
1	21.275	1	1	0	0	0	0	0	392	150000	267	392000	0	0	1	6	0	0	0	1	0	0	0	0	1	0	0	0	1	0	1	1	0	0	0	1.83333
1	22.4833	1	1	0	0	0	0	0			350	30600	0	0	1	6	0	0	0	0	0	1	0	0	0	1	0	0	1	0	0	0	0	0	1	5.46667
1	22.8389	1	1	0	0	0	0	0	264	88100	264	88100	0	0	1	6	0	0	0	0	0	1	0	0	1	0	0	0	1	1	0	0	0	0	0	0.466667
1	22.875	1	1	0	0	0	0	0	51	225000	51	225000	0	1	1	6	0	0	0	0	1	0	0	0	1	0	0	0	1	1	0	0	0	0	0	1.33333
1	23.5667	1	1	0	0	0	0	0	161	5300	161	5300	0	1	1	6	0	0	0	0	0	1	0	0	1	0	0	0	0	0	0	0	0	0	0	6
1	22.575	1	1	0	0	0	0	0	416	448	416	3480	0	0	1	6	0	0	1	0	0	0	0	0	1	0	0	0	0	0	0	0	0	0	0	6
1	24.9556	1	1	0	0	0	0	0	265	23100	265	23100	0	0	1	6	0	0	0	0	0	0	0	1	0	0	1	0	0	0	0	0	0	0	0	6
1	22.95	1	1	0	0	0	0	0	122	77900	122	77900	0	1	1	6	0	0	0	1	0	0	0	0	1	0	0	0	1	0	0	0	0	1	0	5.83333
1	23.175	1	0	1	0	0	1	0	282	104000	282	104000	0	0	1	6	0	0	0	1	0	0	0	0	1	0	0	0	1	1	0	0	0	0	0	1.53333
1	24.8417	1	1	0	0	0	0	0	382	116000	263	242000	0	0	1	6	0	0	0	0	0	0	1	0	1	0	0	0	0	0	0	0	0	0	0	6
1	24.5944	1	1	0	0	0	0	0	18	367000	18	367000	1	1	1	6	0	0	0	0	0	1	0	0	1	0	0	0	1	1	0	0	0	0	0	0.433333
1	25.4833	1	1	0	0	0	0	0	480	5280	480	5280	0	0	1	6	0	0	0	0	0	0	0	1	1	0	0	0	1	1	0	0	0	0	0	0.466667
1	24.8667	1	1	0	0	0	0	0	99	3580000	99	3580000	0	1	1	6	0	0	0	0	0	0	1	0	1	0	0	0	0	0	0	0	0	0	0	6
1	25.0028	1	0	1	0	0	0	0	23	163000	23	163000	1	1	1	6	0	0	0	0	0	0	1	0	0	0	1	0	0	0	0	0	0	0	0	6
1	24.5194	1	1	0	0	0	0	0	295	53900	295	53900	0	0	1	6	0	0	0	0	0	1	0	0	1	0	0	0	1	1	0	0	0	0	0	2.1
1	24.1	1	1	0	0	0	0	0	432	17200	293	16200	0	0	1	6	0	0	0	1	0	0	0	0	1	0	0	0	1	1	0	0	0	0	0	0.7
1	25.1611	1	1	0	0	0	0	0	628	79000	201	79900	0	0	1	6	0	0	0	0	1	0	0	0	1	0	0	0	1	1	0	0	0	0	0	1.86667
1	25.175	1	1	0	0	0	0	0	145	119000	145	119000	0	1	1	6	0	0	0	0	1	0	0	0	1	0	0	0	1	1	0	0	0	0	0	0.866667
1	23.6611	1	1	0	0	0	0	0	228	209111	228	209111	0	0	1	6	0	1	0	0	0	0	0	0	1	0	0	0	0	0	0	0	0	0	0	6
1	26.5806	1	1	0	0	0	0	0	152	6400	152	6400	0	1	1	6	0	0	0	0	0	0	0	1	1	0	0	0	0	0	0	0	0	0	0	6
1	26.4028	1	1	0	0	0	0	0	385	2420	385	2420	0	0	1	6	0	0	0	0	0	0	0	1	1	0	0	0	0	0	0	0	0	0	0	6
1	23.1167	1	1	0	0	0	0	0	104	104000	104	104000	0	1	1	6	1	0	0	0	0	0	0	0	1	0	0	0	1	1	0	0	0	0	0	0.466667
1	26.2694	1	1	0	0	0	0	0	100	20000	100	20000	0	1	1	6	0	0	0	0	0	0	1	0	1	0	0	0	0	0	0	0	0	0	0	6
1	26.6472	1	1	0	0	0	0	0	18	224000	18	224000	1	1	1	6	0	0	0	0	0	0	0	1	1	0	0	0	1	1	0	0	0	0	0	0.466667
1	26.5333	1	1	0	0	0	1	0	363	1534364	363	1534364	0	0	1	6	0	0	0	0	0	0	1	0	1	0	0	0	1	0	1	1	0	0	0	1.63333
1	26.7528	1	0	1	0	0	0	0	798	7790	559	42200	0	0	0	6	0	0	0	0	0	0	1	0	1	0	0	0	1	1	0	0	0	0	0	0.433333
1	25.0944	1	0	1	0	0	0	0	30	835000	30	835000	1	1	1	6	0	0	1	0	0	0	0	0	1	0	0	0	1	1	0	0	0	0	0	0.366667
1	26.4111	1	1	0	0	0	1	0	320	17900	243	40700	0	0	1	6	0	0	0	0	1	0	0	0	1	0	0	0	0	0	0	0	0	0	0	6
1	26.7278	1	1	0	0	0	0	0	190	28400	190	28400	0	1	1	6	0	1	0	0	0	0	0	0	1	0	0	0	1	1	0	0	0	0	0	0.766667
1	27.3611	1	1	0	0	0	0	0	472	85800	274	44400	0	0	1	6	0	0	1	0	0	0	0	0	1	0	0	0	0	0	0	0	0	0	0	6
1	28.725	1	1	0	0	0	0	0	93	376000	93	376000	0	1	1	6	0	0	1	0	0	0	0	0	1	0	0	0	1	0	1	1	0	0	0	5.46667
1	28.3528	1	1	0	0	0	0	0			116	5640	0	1	1	6	0	1	0	0	0	0	0	0	1	0	0	0	0	0	0	0	0	0	0	6
1	43.1167	1	1	0	0	0	0	0			142	356000	0	1	1	6	0	0	0	1	0	0	0	0	1	0	0	0	1	1	0	0	0	0	0	0.166667
1	43.5833	1	0	0	1	0	0	1	22	150000	22	150000	0	1	1	6	0	0	1	0	0	0	0	0	1	0	0	0	1	1	0	0	0	0	0	0.933333
1	45.1167	1	0	1	0	0	0	0	414	31400	350	31600	0	0	1	6	0	0	0	0	0	1	0	0	1	0	0	0	1	1	0	0	0	0	0	2.3
1	43.9472	1	1	0	0	0	0	1	22	115000	22	115000	1	1	1	6	1	0	0	0	0	0	0	0	1	0	0	0	1	1	0	0	0	0	0	1.7
1	48.6778	0	0	1	0	0	0	0	137	446	137	446	0	1	1	6	0	0	0	1	0	0	0	0	1	0	0	0	1	1	0	0	0	0	0	1.4
1	25.9123	1	1	0	0	0	0	0			257.5	17308	0	0	1	6	1	0	0	0	0	0	0	0	1	0	0	0	0	0	0	0	0	0	0	6
1	41.7151	1	0	0	1	0	1	1			146	42953	0	1	1	6	1	0	0	0	0	0	0	0	1	0	0	0	0	0	0	0	0	0	0	6
1	31.6904	1	0	0	1	0	0	1			330	200000	0	0	1	6	1	0	0	0	0	0	0	0	1	0	0	0	0	0	0	0	0	0	0	6
1	49.7178	1	0	0	1	0	1	1			249.9	212000	0	0	1	6	1	0	0	0	0	0	0	0	1	0	0	0	1	1	0	0	0	0	0	0.4
1	34.389	1	0	0	1	0	0	1			469	58400	0	0	1	6	1	0	0	0	0	0	0	0	1	0	0	0	0	0	0	0	0	0	0	6
1	54.4411	0	0	0	1	0	0	1			87.7	42054	0	1	1	6	1	0	0	0	0	0	0	0	1	0	0	0	0	0	0	0	0	0	0	6
1	27.3151	1	0	0	0	1	0	0			125.4	196200	0	1	1	6	1	0	0	0	0	0	0	0	1	0	0	0	0	0	0	0	0	0	0	6
1	37.2904	1	0	0	0	1	0	0			23.3	57862	0	1	1	6	1	0	0	0	0	0	0	0	1	0	0	0	0	0	0	0	0	0	0	6
1	46.9836	1	0	0	1	0	0	1			87.2	3430	0	1	1	6	1	0	0	0	0	0	0	0	1	0	0	0	1	1	0	0	0	0	0	2.3
1	47.6959	1	1	0	0	0	0	0			268.7	17203	0	0	1	6	1	0	0	0	0	0	0	0	1	0	0	0	1	1	0	0	0	0	0	2.1
1	26.4712	1	1	0	0	0	0	0			319	195000	0	0	1	6	1	0	0	0	0	0	0	0	1	0	0	0	0	0	0	0	0	0	0	6
1	28.7863	1	1	0	0	0	1	0			336.7	9866	0	0	1	6	1	0	0	0	0	0	0	0	1	0	0	0	0	0	0	0	0	0	0	6
1	28.0384	1	1	0	0	0	1	0			87.2	100400	0	1	1	6	1	0	0	0	0	0	0	0	1	0	0	0	0	0	0	0	0	0	0	6
1	36.7753	1	0	0	1	0	0	1			378.3	433	0	0	1	6	1	0	0	0	0	0	0	0	1	0	0	0	1	1	0	0	0	0	0	4.03333
1	32.2712	1	1	0	0	0	0	0			164.6	105900	0	1	1	6	1	0	0	0	0	0	0	0	1	0	0	0	0	0	0	0	0	0	0	6
1	36.6822	1	0	0	1	0	0	1			193.8	57599	0	1	1	6	1	0	0	0	0	0	0	0	1	0	0	0	1	1	0	0	0	0	0	0.5
1	34.9233	1	0	1	0	0	0	0			301.3	8344	0	0	1	6	1	0	0	0	0	0	0	0	1	0	0	0	1	1	0	0	0	0	0	0.466667
1	21.8877	1	1	0	0	0	0	0			386.8	26728	0	0	1	6	1	0	0	0	0	0	0	0	1	0	0	0	0	0	0	0	0	0	0	6
1	32.5014	1	0	0	1	0	0	1			150.2	385100	0	1	1	6	1	0	0	0	0	0	0	0	1	0	0	0	1	1	1	1	0	0	0	3.56667
1	23.389	1	1	0	0	0	0	0			187.7	238700	1	1	1	6	1	0	0	0	0	0	0	0	1	0	0	0	0	0	0	0	0	0	0	6
1	28.0685	1	1	0	0	0	0	0			169.9	49834	0	1	1	6	1	0	0	0	0	0	0	0	1	0	0	0	1	1	0	0	0	0	0	0.4
1	39.8438	0	0	0	1	0	0	1			250	19728	0	0	1	6	1	0	0	0	0	0	0	0	1	0	0	0	0	0	0	0	0	0	0	6
1	44.7945	1	1	0	0	0	1	0			175.7	45472	0	1	1	6	1	0	0	0	0	0	0	0	1	0	0	0	0	0	0	0	0	0	0	6
1	62.5452	1	1	0	0	0	0	0			305.4	8346	0	0	1	6	1	0	0	0	0	0	0	0	1	0	0	0	1	1	0	0	0	0	0	1.4
1	27.2658	1	0	0	0	1	0	0			69.5	625900	0	1	1	6	1	0	0	0	0	0	0	0	1	0	0	0	0	0	0	0	0	0	0	6
1	49.6055	1	0	0	0	1	1	0			372.4	131400	0	0	1	6	1	0	0	0	0	0	0	0	1	0	0	0	0	0	0	0	0	0	0	6
1	18.5616	1	1	0	0	0	0	0			205.9	19277	0	0	1	6	1	0	0	0	0	0	0	0	1	0	0	0	0	0	0	0	0	0	0	6
1	38.3178	1	0	0	1	0	0	1			244.7	97830	0	0	1	6	1	0	0	0	0	0	0	0	1	0	0	0	0	0	0	0	0	0	0	6
1	34.2192	1	1	0	0	0	0	0			136.3	113900	1	1	1	6	1	0	0	0	0	0	0	0	1	0	0	0	0	0	0	0	0	0	0	6
1	29.4603	1	0	1	0	0	0	0			181.2	393400	0	1	1	6	1	0	0	0	0	0	0	0	1	0	0	0	0	0	0	0	0	0	0	6
1	35.8849	1	0	0	1	0	1	1			131	387	0	1	1	6	1	0	0	0	0	0	0	0	1	0	0	0	0	0	0	0	0	0	0	6
1	42.2247	1	0	0	1	0	0	1			363.3	8725	0	0	1	6	1	0	0	0	0	0	0	0	1	0	0	0	0	0	0	0	0	0	0	6
1	24.9562	1	1	0	0	0	0	1			231	273300	0	0	1	6	1	0	0	0	0	0	0	0	0	1	0	0	0	0	0	0	0	0	0	6
1	27.1397	1	1	0	0	0	0	0			137.7	22377	0	1	1	6	1	0	0	0	0	0	0	0	1	0	0	0	1	1	0	0	0	0	0	0.5
1	38.3123	1	1	0	0	0	0	0			155.8	64983	0	1	1	6	1	0	0	0	0	0	0	0	1	0	0	0	0	0	0	0	0	0	0	6
1	26.2164	1	1	0	0	0	0	0			244.9	274000	0	0	1	6	1	0	0	0	0	0	0	0	1	0	0	0	0	0	0	0	0	0	0	6
1	36.5014	1	1	0	0	0	0	0			242.6	10921	0	0	1	6	1	0	0	0	0	0	0	0	1	0	0	0	1	1	0	0	0	0	0	0.533333
1	34.8548	1	1	0	0	0	1	0			2.3	104400	1	1	1	6	1	0	0	0	0	0	0	0	1	0	0	0	1	0	1	1	0	0	0	1.73333
1	37.989	1	0	0	1	0	0	1			355.8	30929	0	0	1	6	1	0	0	0	0	0	0	0	1	0	0	0	1	1	0	0	0	0	0	0.466667
1	31.4986	1	1	0	0	0	0	0			44.8	387600	1	1	1	6	1	0	0	0	0	0	0	0	1	0	0	0	1	1	0	0	0	0	0	1.63333
1	49.4384	1	1	0	0	0	0	0			35	100836	0	1	1	6	1	0	0	0	0	0	0	0	1	0	0	0	0	0	0	0	0	0	0	6
1	36.8466	0	0	0	1	0	0	1			200.1	5752	0	0	1	6	1	0	0	0	0	0	0	0	1	0	0	0	0	0	0	0	0	0	0	6
1	43.274	1	0	0	1	0	0	1			284.9	518	0	0	1	6	1	0	0	0	0	0	0	0	1	0	0	0	1	1	0	0	0	0	0	1.13333
1	46.2904	1	0	0	1	0	0	1			206.2	3057	0	0	1	6	1	0	0	0	0	0	0	0	1	0	0	0	0	0	0	0	0	0	0	6
1	36.4767	1	0	0	1	0	0	1			427.7	1150	0	0	1	6	1	0	0	0	0	0	0	0	1	0	0	0	0	0	0	0	0	0	0	6
1	40.874	1	0	0	1	0	1	1			200	13426	0	0	1	6	1	0	0	0	0	0	0	0	1	0	0	0	0	0	0	0	0	0	0	6
1	37.3863	1	0	0	1	0	0	1			133.5	68959	0	1	1	6	1	0	0	0	0	0	0	0	1	0	0	0	0	0	0	0	0	0	0	6
1	43.8192	1	0	0	1	0	0	0			241	1043	0	0	1	6	1	0	0	0	0	0	0	0	1	0	0	0	0	0	0	0	0	0	0	6
1	39.2795	1	0	0	1	0	0	1			389.7	57770	1	1	1	6	1	0	0	0	0	0	0	0	1	0	0	0	0	0	0	0	0	0	0	6
1	41.663	1	0	0	1	0	0	1			393.2	41114	0	0	1	6	1	0	0	0	0	0	0	0	1	0	0	0	0	0	0	0	0	0	0	6
1	22.1945	1	1	0	0	0	0	0			208.8	27800	0	0	1	6	1	0	0	0	0	0	0	0	1	0	0	0	1	1	0	0	0	0	0	0.466667
1	35.2986	0	0	0	1	0	0	0			227.2	991	0	0	1	6	1	0	0	0	0	0	0	0	1	0	0	0	0	0	0	0	0	0	0	6
1	35.2603	0	0	0	1	0	0	1			327	2916	0	0	1	6	1	0	0	0	0	0	0	0	1	0	0	0	0	0	0	0	0	0	0	6
1	58.4548	1	1	0	0	0	1	0			90.8	514700	1	1	1	6	1	0	0	0	0	0	0	0	1	0	0	0	0	0	0	0	0	0	0	6
1	38.389	1	1	0	0	0	0	0			104.6	80589	1	1	1	6	1	0	0	0	0	0	0	0	1	0	0	0	1	1	0	0	0	0	0	2.53333
1	26.589	1	1	0	0	0	0	0			275.2	257100	0	0	1	6	1	0	0	0	0	0	0	0	1	0	0	0	1	1	0	0	0	0	0	1.7
1	26.9205	1	1	0	0	0	0	0			161.5	169500	0	1	1	6	1	0	0	0	0	0	0	0	1	0	0	0	1	1	0	0	0	0	0	0.533333
1	52.5178	1	0	0	1	0	0	1			270.6	27976	0	0	1	4.86667	1	0	0	0	0	0	0	0	1	0	0	0	1	1	0	0	0	0	0	0.233333
1	30.1699	1	1	0	0	0	0	0			319.1	2507	0	0	1	6	1	0	0	0	0	0	0	0	1	0	0	0	0	0	0	0	0	0	0	6
1	25.0685	1	1	0	0	0	0	0			179.5	153200	0	1	1	6	1	0	0	0	0	0	0	0	1	0	0	0	1	1	0	0	0	0	0	1.33333
1	34.5041	1	1	0	0	0	0	0			323.7	75639	0	0	1	6	1	0	0	0	0	0	0	0	1	0	0	0	0	0	0	0	0	0	0	6
1	42.4795	1	0	0	1	0	0	1			172	361900	0	1	1	6	1	0	0	0	0	0	0	0	1	0	0	0	0	0	0	0	0	0	0	6
1	48.0575	1	0	0	1	0	1	1			112.6	68115	0	1	1	6	1	0	0	0	0	0	0	0	1	0	0	0	1	1	0	0	0	0	0	5.86667
1	25.4712	1	1	0	0	0	0	0			177	155400	0	1	1	6	1	0	0	0	0	0	0	0	1	0	0	0	0	0	0	0	0	0	0	6
1	27.6466	1	1	0	0	0	0	0			303.9	29595	0	0	1	6	1	0	0	0	0	0	0	0	1	0	0	0	0	0	0	0	0	0	0	6
1	46.3068	1	1	0	0	0	0	0			283.4	1727	0	0	1	6	1	0	0	0	0	0	0	0	1	0	0	0	0	0	0	0	0	0	0	6
1	29.2849	1	1	0	0	0	0	0			171.3	190600	0	1	1	6	1	0	0	0	0	0	0	0	1	0	0	0	1	1	0	0	0	0	0	2.66667
1	37.8466	1	0	0	1	0	0	1			521	22333	0	0	0	6	1	0	0	0	0	0	0	0	1	0	0	0	1	0	1	1	0	0	0	1.4
1	38.9096	1	1	0	0	0	0	0			344.9	144400	0	0	1	6	1	0	0	0	0	0	0	0	1	0	0	0	0	0	0	0	0	0	0	6
1	27.2219	1	1	0	0	0	0	0			142	232300	0	1	1	6	1	0	0	0	0	0	0	0	1	0	0	0	0	0	0	0	0	0	0	6
1	27.7918	1	1	0	0	0	0	0			214.1	51614	0	0	1	6	1	0	0	0	0	0	0	0	1	0	0	0	1	1	0	0	0	0	0	0.7
1	33.3918	1	1	0	0	0	1	0			355.2	19513	0	0	1	6	1	0	0	0	0	0	0	0	1	0	0	0	0	0	0	0	0	0	0	6
1	22.1342	1	1	0	0	0	0	0			265.2	383200	0	0	1	6	1	0	0	0	0	0	0	0	1	0	0	0	0	0	0	0	0	0	0	6
1	33.2521	1	1	0	0	0	0	0			34	713100	1	1	1	6	1	0	0	0	0	0	0	0	1	0	0	0	0	0	0	0	0	0	0	6
1	31.0219	1	1	0	0	0	0	0			47	128600	0	1	1	6	1	0	0	0	0	0	0	0	1	0	0	0	0	0	0	0	0	0	0	6
1	51.4904	1	0	0	1	0	1	1			313	70472	0	0	1	6	1	0	0	0	0	0	0	0	1	0	0	0	1	1	0	0	0	0	0	1.86667
1	41.9781	1	1	0	0	0	0	0			12.8	1529000	1	1	1	6	1	0	0	0	0	0	0	0	1	0	0	0	1	1	0	0	0	0	0	0.7
1	41.0247	1	0	0	1	0	0	1			217.2	59570	0	0	1	6	1	0	0	0	0	0	0	0	1	0	0	0	0	0	0	0	0	0	0	6
1	42.337	0	0	1	0	0	0	0			132.4	12303	0	1	1	6	1	0	0	0	0	0	0	0	1	0	0	0	1	1	0	0	0	0	0	5.9
1	48.2384	1	1	0	0	0	1	0			49.1	102100	1	1	1	6	1	0	0	0	0	0	0	0	1	0	0	0	0	0	0	0	0	0	0	6
1	32.7123	0	0	0	1	0	1	1			276.3	6353	0	0	1	6	1	0	0	0	0	0	0	0	1	0	0	0	0	0	0	0	0	0	0	6
1	41.2247	1	1	0	0	0	0	0			201.1	12463	0	0	1	6	1	0	0	0	0	0	0	0	1	0	0	0	0	0	0	0	0	0	0	6
1	20.7836	1	1	0	0	0	0	0			290.4	418600	0	0	1	6	1	0	0	0	0	0	0	0	1	0	0	0	0	0	0	0	0	0	0	6
1	37.3041	1	0	0	1	0	0	1			480.5	203100	0	0	1	6	1	0	0	0	0	0	0	0	1	0	0	0	1	1	0	0	0	0	0	1.63333
1	38.4219	1	1	0	0	0	1	0			274.7	82422	0	0	1	6	1	0	0	0	0	0	0	0	1	0	0	0	0	0	0	0	0	0	0	6
1	37.989	1	0	0	1	0	0	1			241.7	41489	0	0	1	6	1	0	0	0	0	0	0	0	1	0	0	0	1	1	0	0	0	0	0	3.96667
1	30.3507	1	1	0	0	0	0	0			209.9	60294	0	0	1	6	1	0	0	0	0	0	0	0	1	0	0	0	1	1	0	0	0	0	0	0.933333
1	34.1644	1	0	0	1	0	0	1			262	473700	0	0	1	6	1	0	0	0	0	0	0	0	1	0	0	0	1	1	0	0	0	0	0	5.6
1	45.9425	1	1	0	0	0	0	0			295.2	143200	0	0	1	6	1	0	0	0	0	0	0	0	1	0	0	0	1	1	0	0	0	0	0	0.866667
1	39.9918	1	0	0	1	0	0	1			570.6	13289	0	0	0	6	1	0	0	0	0	0	0	0	1	0	0	0	0	0	0	0	0	0	0	6
1	29.211	1	1	0	0	0	0	0			387.1	6093	0	0	1	6	1	0	0	0	0	0	0	0	1	0	0	0	0	0	0	0	0	0	0	6
1	20.6959	1	1	0	0	0	0	0			204.1	112900	0	0	1	6	1	0	0	0	0	0	0	0	1	0	0	0	0	0	0	0	0	0	0	6
1	33.3808	1	1	0	0	0	0	0			224.2	27204	1	1	1	6	0	1	0	0	0	0	0	0	1	0	0	0	1	1	0	0	0	0	0	1.86667
1	39.4137	1	0	0	1	0	0	1			194.9	94279	0	1	1	6	0	1	0	0	0	0	0	0	1	0	0	0	1	1	0	0	0	0	0	3.93333
1	23.211	1	1	0	0	0	0	0			207.2	40498	0	0	1	6	0	1	0	0	0	0	0	0	1	0	0	0	1	1	0	0	0	0	0	4.4
1	37.1671	1	0	0	1	0	1	1			126.2	27417	0	1	1	6	0	1	0	0	0	0	0	0	1	0	0	0	0	0	0	0	0	0	0	6
1	47.4658	1	0	0	1	0	0	1			230.7	1285	0	0	1	6	0	1	0	0	0	0	0	0	1	0	0	0	0	0	0	0	0	0	0	6
1	27.7315	1	1	0	0	0	0	0			353.4	35829	0	0	1	6	0	1	0	0	0	0	0	0	1	0	0	0	1	0	1	1	0	0	0	1.23333
1	25.4767	1	1	0	0	0	0	0			49.9	128400	1	1	1	3.4	0	1	0	0	0	0	0	0	1	0	0	0	1	0	1	0	1	0	0	3.4
1	54.7205	0	0	0	1	0	0	1			259.5	98188	0	0	1	6	0	1	0	0	0	0	0	0	1	0	0	0	1	1	0	0	0	0	0	2.13333
1	41.0438	1	1	0	0	0	0	0			144.9	48865	0	1	1	6	0	1	0	0	0	0	0	0	1	0	0	0	0	0	0	0	0	0	0	6
1	20.5014	1	1	0	0	0	0	0			440	1419	0	0	1	6	0	1	0	0	0	0	0	0	1	0	0	0	0	0	0	0	0	0	0	6
1	33.6849	1	1	0	0	0	0	0			426.1	24251	0	0	1	6	0	1	0	0	0	0	0	0	1	0	0	0	1	1	0	0	0	0	0	2.03333
1	27.1945	1	1	0	0	0	0	0			213.4	59830	0	0	1	6	0	1	0	0	0	0	0	0	1	0	0	0	0	0	0	0	0	0	0	6
1	25.9233	1	1	0	0	0	0	0			51.1	152600	1	1	1	6	0	1	0	0	0	0	0	0	1	0	0	0	1	0	1	1	0	0	0	1.63333
1	40.4082	1	0	0	1	0	0	1			184.9	193700	0	1	1	6	0	1	0	0	0	0	0	0	1	0	0	0	1	1	0	0	0	0	0	3.7
1	26.6795	1	1	0	0	0	0	0			24.9	165400	1	1	1	6	0	1	0	0	0	0	0	0	1	0	0	0	1	0	1	1	0	0	0	0.466667
1	19.6438	1	1	0	0	0	0	0			237.1	34740	0	0	1	6	0	1	0	0	0	0	0	0	1	0	0	0	0	0	0	0	0	0	0	6
1	28.6274	1	1	0	0	0	0	0			12.1	347900	1	1	1	6	0	1	0	0	0	0	0	0	0	1	0	0	0	0	0	0	0	0	0	6
1	37.7479	1	1	0	0	0	0	0			630.5	68937	0	0	0	6	0	1	0	0	0	0	0	0	1	0	0	0	0	0	0	0	0	0	0	6
1	21.6411	1	1	0	0	0	0	0			205.6	119000	0	0	1	6	0	1	0	0	0	0	0	0	1	0	0	0	0	0	0	0	0	0	0	6
1	32.411	1	1	0	0	0	0	0			331.3	32958	0	0	1	6	0	1	0	0	0	0	0	0	1	0	0	0	0	0	0	0	0	0	0	6
1	28.3781	1	0	0	1	0	0	0			301.9	16271	0	0	1	6	0	1	0	0	0	0	0	0	1	0	0	0	0	0	0	0	0	0	0	6
1	44.4548	1	0	0	1	0	0	1			436	927	0	0	1	6	0	1	0	0	0	0	0	0	0	1	0	0	0	0	0	0	0	0	0	6
1	29.4384	1	1	0	0	0	0	0			89.1	247000	1	1	1	6	0	1	0	0	0	0	0	0	1	0	0	0	1	1	0	0	0	0	0	0.633333
1	36.2301	1	0	0	1	0	0	1			171.6	59539	0	1	1	6	0	1	0	0	0	0	0	0	1	0	0	0	1	1	0	0	0	0	0	1.5
1	21.3068	1	1	0	0	0	0	0			196.7	66894	0	1	1	6	0	1	0	0	0	0	0	0	1	0	0	0	1	1	0	0	0	0	0	1.1
1	33.9397	1	1	0	0	0	0	0			294.2	76641	0	0	1	6	0	1	0	0	0	0	0	0	1	0	0	0	0	0	0	0	0	0	0	6
1	40.5562	0	0	0	1	0	0	1			245.6	21499	0	0	1	6	0	1	0	0	0	0	0	0	1	0	0	0	1	1	0	0	0	0	0	5.6
1	49.7808	1	1	0	0	0	0	0			261.2	120400	0	0	1	6	0	1	0	0	0	0	0	0	1	0	0	0	0	0	0	0	0	0	0	6
1	42.7726	1	1	0	0	0	0	0			264	40900	0	0	1	6	0	1	0	0	0	0	0	0	1	0	0	0	1	1	0	0	0	0	0	1.83333
1	35.9479	1	0	0	1	0	0	1			149	176500	0	1	1	6	0	1	0	0	0	0	0	0	1	0	0	0	0	0	0	0	0	0	0	6
1	50.3452	1	0	0	1	0	0	1			394.9	398500	0	0	1	6	0	1	0	0	0	0	0	0	1	0	0	0	0	0	0	0	0	0	0	6
1	23.2466	1	1	0	0	0	0	0			375.1	134400	0	0	1	6	0	1	0	0	0	0	0	0	1	0	0	0	0	0	0	0	0	0	0	6
1	28.2658	1	1	0	0	0	1	0			353.4	44176	0	0	1	6	0	1	0	0	0	0	0	0	1	0	0	0	0	0	0	0	0	0	0	6
1	40.1753	1	0	0	1	0	0	1			78	35000	0	1	1	6	0	1	0	0	0	0	0	0	1	0	0	0	0	0	0	0	0	0	0	6
1	31.4247	1	1	0	0	0	0	0			298.9	14760	0	0	1	6	0	1	0	0	0	0	0	0	1	0	0	0	1	1	0	0	0	0	0	1.4
1	44.3342	1	0	0	1	0	1	1			322	91683	0	0	1	6	0	1	0	0	0	0	0	0	1	0	0	0	1	1	0	0	0	0	0	1.66667
1	23.3507	1	1	0	0	0	0	0			346	14083	0	0	1	6	0	1	0	0	0	0	0	0	1	0	0	0	1	1	0	0	0	0	0	1.63333
1	24.7288	1	1	0	0	0	0	0			378	17369	0	0	1	6	0	1	0	0	0	0	0	0	1	0	0	0	1	1	0	0	0	0	0	1.33333
1	29.9863	1	1	0	0	0	0	0			400.3	334400	0	0	1	6	0	1	0	0	0	0	0	0	1	0	0	0	0	0	0	0	0	0	0	6
1	41.9315	1	1	0	0	0	0	0			487.7	30394	0	0	1	6	0	1	0	0	0	0	0	0	1	0	0	0	0	0	0	0	0	0	0	6
1	53.7123	1	0	0	1	0	0	1			223.6	6322	0	0	1	6	0	1	0	0	0	0	0	0	1	0	0	0	1	1	0	0	0	0	0	0.466667
1	29.4603	1	1	0	0	0	0	0			242.9	34926	0	0	1	6	0	1	0	0	0	0	0	0	1	0	0	0	0	0	0	0	0	0	0	6
1	54.3178	1	0	0	1	0	0	1			279.8	20514	0	0	1	6	0	1	0	0	0	0	0	0	1	0	0	0	1	1	0	0	0	0	0	4.9
1	31.8164	1	1	0	0	0	0	0			523	27171	0	0	0	6	0	1	0	0	0	0	0	0	1	0	0	0	1	1	0	0	0	0	0	2.1
1	28.2877	1	1	0	0	0	0	0			19.9	873500	1	1	1	1.8	0	1	0	0	0	0	0	0	1	0	0	0	1	0	1	0	1	0	0	1.8
1	50.4849	1	0	0	1	0	0	1			395.8	12152	0	0	1	6	0	1	0	0	0	0	0	0	1	0	0	0	0	0	0	0	0	0	0	6
1	32.7507	1	1	0	0	0	0	0			299	471500	0	0	1	6	0	1	0	0	0	0	0	0	1	0	0	0	0	0	0	0	0	0	0	6
1	43.7452	1	0	0	1	0	1	1			229	104800	0	0	1	6	0	1	0	0	0	0	0	0	1	0	0	0	1	1	0	0	0	0	0	2.4
1	49.2082	1	1	0	0	0	0	0			88.5	366300	0	1	1	6	0	1	0	0	0	0	0	0	1	0	0	0	1	1	0	0	0	0	0	0.466667
1	23.7068	1	0	1	0	0	0	0			286.3	23379	0	0	1	6	0	1	0	0	0	0	0	0	1	0	0	0	1	1	0	0	0	0	0	1.13333
1	35.4411	1	1	0	0	0	0	0			225	129300	0	0	1	6	0	1	0	0	0	0	0	0	1	0	0	0	1	1	0	0	0	0	0	0.466667
1	23.6521	1	1	0	0	0	0	0			211	48770	0	0	1	6	0	1	0	0	0	0	0	0	1	0	0	0	1	1	0	0	0	0	0	0.933333
1	31.5151	0	0	0	1	0	0	1			717	319000	0	0	0	6	0	1	0	0	0	0	0	0	1	0	0	0	1	1	0	0	0	0	0	1.4
1	31.7945	1	0	0	0	1	0	0			181	61575	0	1	1	6	0	1	0	0	0	0	0	0	1	0	0	0	0	0	0	0	0	0	0	6
1	29.1479	1	1	0	0	0	0	0			111	125800	1	1	1	5.76667	0	1	0	0	0	0	0	0	1	0	0	0	1	0	1	1	0	0	0	1.33333
1	32.0466	1	0	1	0	0	0	0			245	34536	0	0	1	6	0	1	0	0	0	0	0	0	1	0	0	0	1	0	1	1	0	0	0	5.6
1	24.8548	1	1	0	0	0	0	0			35	1160000	1	1	1	6	0	1	0	0	0	0	0	0	1	0	0	0	0	0	0	0	0	0	0	6
1	46.1151	1	0	0	1	0	0	1			286	501600	0	0	1	6	0	1	0	0	0	0	0	0	1	0	0	0	0	0	0	0	0	0	0	6
1	28.0274	1	1	0	0	0	0	0			289	119700	0	0	1	6	0	1	0	0	0	0	0	0	1	0	0	0	1	1	0	0	0	0	0	0.466667
1	25.4986	1	1	0	0	0	0	0			234.2	78649	0	0	1	6	0	1	0	0	0	0	0	0	1	0	0	0	1	1	0	0	0	0	0	0.933333
1	19.6658	1	1	0	0	0	0	0			250	30471	0	0	1	6	0	1	0	0	0	0	0	0	1	0	0	0	0	0	0	0	0	0	0	6
1	34.1151	1	0	0	1	0	0	1			213	75612	0	0	1	6	0	1	0	0	0	0	0	0	1	0	0	0	0	0	0	0	0	0	0	6
1	26.2822	1	1	0	0	0	0	1			95	125900	1	1	1	6	0	1	0	0	0	0	0	0	1	0	0	0	0	0	0	0	0	0	0	6
1	49.0521	1	0	0	1	0	0	1			399	166	0	0	1	6	0	1	0	0	0	0	0	0	1	0	0	0	0	0	0	0	0	0	0	6
1	38.4274	1	1	0	0	0	0	0			30.5	2061000	1	1	1	6	0	1	0	0	0	0	0	0	1	0	0	0	1	1	0	0	0	0	0	0.466667
1	27.4192	1	1	0	0	0	0	0			151	362000	1	1	1	6	0	1	0	0	0	0	0	0	1	0	0	0	0	0	0	0	0	0	0	6
1	21.8575	1	1	0	0	0	0	0			182	50092	0	1	1	6	0	1	0	0	0	0	0	0	1	0	0	0	0	0	0	0	0	0	0	6
1	31.9753	1	1	0	0	0	0	0			37	3719000	1	1	1	6	0	1	0	0	0	0	0	0	1	0	0	0	1	1	0	0	0	0	0	1
1	31.7562	1	0	0	1	0	1	1			190	90332	0	1	1	6	0	1	0	0	0	0	0	0	1	0	0	0	0	0	0	0	0	0	0	6
1	37.8247	1	0	0	1	0	0	1			501	12653	0	0	0	6	0	1	0	0	0	0	0	0	1	0	0	0	0	0	0	0	0	0	0	6
1	35.0356	1	1	0	0	0	0	0			218	7329	0	0	1	6	0	1	0	0	0	0	0	0	1	0	0	0	1	0	1	1	0	0	0	0.466667
1	27.6767	1	1	0	0	0	0	0			287	68739	0	0	1	6	0	1	0	0	0	0	0	0	1	0	0	0	0	0	0	0	0	0	0	6
1	27.9425	1	1	0	0	0	0	0			182	13578	0	1	1	6	0	1	0	0	0	0	0	0	1	0	0	0	0	0	0	0	0	0	0	6
1	36.2822	1	1	0	0	0	0	0			168	72736	1	1	1	6	0	1	0	0	0	0	0	0	1	0	0	0	0	0	0	0	0	0	0	6
1	29.926	0	0	0	1	0	0	1			355.9	5322	0	0	1	6	0	1	0	0	0	0	0	0	1	0	0	0	0	0	0	0	0	0	0	6
1	30.126	1	1	0	0	0	0	0			1043	6538	0	0	0	6	0	1	0	0	0	0	0	0	1	0	0	0	0	0	0	0	0	0	0	6
1	37.7288	0	0	0	1	0	0	1			274	25633	0	0	1	6	0	1	0	0	0	0	0	0	0	0	1	0	0	0	0	0	0	0	0	6
1	31.9534	1	1	0	0	0	0	0			40	135800	0	1	1	6	0	1	0	0	0	0	0	0	1	0	0	0	0	0	0	0	0	0	0	6
1	51.1151	1	0	0	1	0	0	1			252	185600	0	0	1	6	0	1	0	0	0	0	0	0	1	0	0	0	1	1	0	0	0	0	0	4.36667
1	31.6274	1	1	0	0	0	0	0			72	710500	1	1	1	6	0	1	0	0	0	0	0	0	1	0	0	0	1	1	0	0	0	0	0	0.433333
1	37.2603	1	0	0	1	0	0	1			704	12897	0	0	0	6	0	1	0	0	0	0	0	0	1	0	0	0	1	1	0	0	0	0	0	0.466667
1	41.3342	1	0	0	1	0	0	1			262	3142	0	0	1	6	0	1	0	0	0	0	0	0	1	0	0	0	0	0	0	0	0	0	0	6
1	32.3342	1	0	0	1	0	0	1			348.2	4325	0	0	1	6	0	1	0	0	0	0	0	0	1	0	0	0	0	0	0	0	0	0	0	6
1	29.9781	1	1	0	0	0	0	0			327	8578	0	0	1	6	0	1	0	0	0	0	0	0	1	0	0	0	0	0	0	0	0	0	0	6
1	43.8192	0	0	0	1	0	0	1			295	39799	0	0	1	6	0	1	0	0	0	0	0	0	1	0	0	0	1	1	0	0	0	0	0	4.4
1	42.3342	1	0	0	1	0	0	1			236	4942	0	0	1	6	0	1	0	0	0	0	0	0	1	0	0	0	0	0	0	0	0	0	0	6
1	64.7534	1	0	0	1	0	0	1			208	15629	0	0	1	6	0	1	0	0	0	0	0	0	1	0	0	0	1	1	0	0	0	0	0	3.96667
1	41.9671	1	0	0	1	0	0	1			278.9	88681	0	0	1	6	0	1	0	0	0	0	0	0	1	0	0	0	1	1	0	0	0	0	0	1.4
1	54.4795	1	0	0	1	0	0	1			293	56326	0	0	1	6	0	1	0	0	0	0	0	0	1	0	0	0	1	1	0	0	0	0	0	0.466667
1	34.9863	1	0	0	1	0	0	1			486	54551	0	0	1	6	0	1	0	0	0	0	0	0	1	0	0	0	0	0	0	0	0	0	0	6
1	40.9041	1	0	0	1	0	0	1			234.1	89118	0	0	1	6	0	1	0	0	0	0	0	0	1	0	0	0	0	0	0	0	0	0	0	6
1	37.5945	1	0	0	1	0	0	1			299	2128	0	0	1	6	0	1	0	0	0	0	0	0	1	0	0	0	1	1	0	0	0	0	0	2.33333
1	38.3068	1	0	0	1	0	0	1			214.8	118600	0	0	1	6	0	1	0	0	0	0	0	0	1	0	0	0	0	0	0	0	0	0	0	6
1	21.8548	1	1	0	0	0	1	0			321	74198	0	0	1	6	0	1	0	0	0	0	0	0	1	0	0	0	1	0	1	1	0	0	0	2.1
1	33.6548	1	0	0	1	0	0	1			405	131400	0	0	1	6	0	1	0	0	0	0	0	0	1	0	0	0	1	1	0	0	0	0	0	0.466667
1	46.4164	1	0	0	1	0	0	0			361	77862	0	0	1	6	0	1	0	0	0	0	0	0	1	0	0	0	1	1	0	0	0	0	0	0.466667
1	36.0493	1	0	0	1	0	0	0			28	577100	0	1	1	6	0	1	0	0	0	0	0	0	1	0	0	0	0	0	0	0	0	0	0	6
1	29.7945	1	1	0	0	0	0	0			221	107300	0	0	1	6	0	1	0	0	0	0	0	0	1	0	0	0	1	1	0	0	0	0	0	1
1	46.6356	1	0	0	1	0	0	1			263	69045	0	0	1	6	0	1	0	0	0	0	0	0	1	0	0	0	0	0	0	0	0	0	0	6
1	29.4356	1	1	0	0	0	0	0			33	144700	1	1	1	6	0	1	0	0	0	0	0	0	1	0	0	0	1	1	0	0	0	0	0	0.233333
1	32.9041	1	0	0	1	0	0	1			447	65744	0	0	1	6	0	1	0	0	0	0	0	0	1	0	0	0	1	1	0	0	0	0	0	2.56667
1	42.5836	1	0	0	1	0	0	1			322	256200	0	0	1	6	0	1	0	0	0	0	0	0	1	0	0	0	1	1	0	0	0	0	0	1.4
1	34.8301	1	0	0	1	0	0	1			230	51726	0	0	1	6	0	1	0	0	0	0	0	0	1	0	0	0	0	0	0	0	0	0	0	6
1	40.9068	1	0	0	1	0	0	1			289.2	17267	0	0	1	6	0	1	0	0	0	0	0	0	1	0	0	0	0	0	0	0	0	0	0	6
1	32.3507	1	0	0	1	0	0	1			242	19474	0	0	1	6	0	1	0	0	0	0	0	0	1	0	0	0	0	0	0	0	0	0	0	6
1	51.3315	1	0	0	1	0	0	1			385.7	33441	0	0	1	6	0	1	0	0	0	0	0	0	1	0	0	0	1	1	0	0	0	0	0	1.86667
1	40.8795	1	0	0	1	0	0	1			346	5730	0	0	1	6	0	1	0	0	0	0	0	0	1	0	0	0	1	1	0	0	0	0	0	3.73333
1	49.4849	1	1	0	0	0	0	0			51	206100	1	1	1	6	0	1	0	0	0	0	0	0	1	0	0	0	1	0	1	1	0	0	0	1.8
1	34.3616	1	1	0	0	0	0	0			91	112900	0	1	1	6	0	1	0	0	0	0	0	0	1	0	0	0	0	0	0	0	0	0	0	6
1	49.0082	1	0	0	1	0	0	1			231.2	130300	0	0	1	6	0	0	1	0	0	0	0	0	1	0	0	0	0	0	0	0	0	0	0	6
1	23.4493	1	1	0	0	0	0	0			159	243231	0	1	1	6	0	0	1	0	0	0	0	0	0	1	0	0	0	0	0	0	0	0	0	6
1	27.8603	1	1	0	0	0	0	0			242	73196	0	0	1	6	0	0	1	0	0	0	0	0	1	0	0	0	1	1	0	0	0	0	0	1.4
1	25.0548	1	1	0	0	0	0	0			41	2075000	0	1	1	6	0	0	1	0	0	0	0	0	1	0	0	0	1	0	1	1	0	0	0	3.26667
1	39.0904	0	0	0	1	0	0	1			198	148800	0	1	1	6	0	0	1	0	0	0	0	0	1	0	0	0	1	1	0	0	0	0	0	3.96667
1	30.7726	1	1	0	0	0	1	0			999	7154	0	0	0	6	0	0	1	0	0	0	0	0	1	0	0	0	0	0	0	0	0	0	0	6
1	55.5863	1	0	0	1	0	1	1			359	17447	0	0	1	6	0	0	1	0	0	0	0	0	1	0	0	0	0	0	0	0	0	0	0	6
1	37.1808	1	0	0	1	0	0	1			453	28821	0	0	1	6	0	0	1	0	0	0	0	0	1	0	0	0	1	1	0	0	0	0	0	2.56667
1	22.4219	1	1	0	0	0	0	0			253	96644	0	0	1	6	0	0	1	0	0	0	0	0	1	0	0	0	0	0	0	0	0	0	0	6
1	31.8932	1	1	0	0	0	0	0			16	148700	0	1	1	5.86667	0	0	1	0	0	0	0	0	0	1	0	0	1	0	1	0	1	0	0	5.9
1	31.9918	1	0	0	1	0	1	1			358	16273	0	0	1	6	0	0	1	0	0	0	0	0	1	0	0	0	0	0	0	0	0	0	0	6
1	32.7726	1	0	0	1	0	0	1			313.9	46581	0	0	1	6	0	0	1	0	0	0	0	0	1	0	0	0	1	1	0	0	0	0	0	5.03333
1	28.1534	1	1	0	0	0	0	0			32	55289	0	1	1	6	0	0	1	0	0	0	0	0	1	0	0	0	0	0	0	0	0	0	0	6
1	33.4411	0	0	0	1	0	0	1			315.4	6756	0	0	1	6	0	0	1	0	0	0	0	0	1	0	0	0	1	1	0	0	0	0	0	0.933333
1	49.4274	1	0	1	0	0	1	0			14	27405	1	1	1	6	0	0	1	0	0	0	0	0	1	0	0	0	1	1	1	1	0	0	0	0.966667
1	23.8767	1	1	0	0	0	0	0			30	200900	0	1	1	6	0	0	1	0	0	0	0	0	1	0	0	0	1	1	0	0	0	0	0	0.5
1	40.3288	0	0	0	1	0	0	1			115.4	147100	0	1	1	6	0	0	1	0	0	0	0	0	1	0	0	0	1	1	0	0	0	0	0	0.466667
1	46.8521	1	1	0	0	0	0	0			77	115800	1	1	1	6	0	0	1	0	0	0	0	0	1	0	0	0	1	1	0	0	0	0	0	5.83333
1	45.274	0	0	1	0	0	0	0			269	2457	0	0	1	6	0	0	1	0	0	0	0	0	1	0	0	0	0	0	0	0	0	0	0	6
1	32.463	1	0	0	1	0	0	1			192	10274	0	1	1	6	0	0	1	0	0	0	0	0	1	0	0	0	1	1	0	0	0	0	0	1.16667
1	36.6767	1	0	0	1	0	0	1			328	57774	0	0	1	6	0	0	1	0	0	0	0	0	1	0	0	0	0	0	0	0	0	0	0	6
1	32.6356	1	1	0	0	0	0	0			240	494200	0	0	1	6	0	0	1	0	0	0	0	0	1	0	0	0	0	0	0	0	0	0	0	6
1	29.7014	1	0	0	1	0	0	1			115	42694	0	1	1	6	0	0	1	0	0	0	0	0	1	0	0	0	1	0	0	0	0	1	0	2.8
1	39.4192	1	0	0	1	0	1	1			321.8	194000	0	0	1	6	0	0	1	0	0	0	0	0	1	0	0	0	0	0	0	0	0	0	0	6
1	31.5507	1	1	0	0	0	0	0			200	1368000	1	1	1	6	0	0	1	0	0	0	0	0	1	0	0	0	1	0	1	1	0	0	0	1.63333
1	34.9096	0	0	0	1	0	0	1			142	416400	0	1	1	6	0	0	1	0	0	0	0	0	1	0	0	0	0	0	0	0	0	0	0	6
1	51.3808	1	0	0	1	0	0	1			150	9025	0	1	1	6	0	0	1	0	0	0	0	0	1	0	0	0	1	1	0	0	0	0	0	2.1
1	43.4329	1	0	0	1	0	0	1			291	14309	0	0	1	6	0	0	1	0	0	0	0	0	1	0	0	0	1	1	0	0	0	0	0	4.6
1	46.2466	1	1	0	0	0	0	0			12	226900	1	1	1	6	0	0	1	0	0	0	0	0	1	0	0	0	0	0	0	0	0	0	0	6
1	34.7973	1	1	0	0	0	0	0			35	1974000	1	1	1	6	0	0	1	0	0	0	0	0	1	0	0	0	1	1	0	0	0	0	0	0.733333
1	22.389	1	1	0	0	0	0	0			213	19700	0	0	1	6	0	0	1	0	0	0	0	0	0	1	0	0	0	0	0	0	0	0	0	6
1	24.126	1	1	0	0	0	0	0			224	14117	0	0	1	6	0	0	1	0	0	0	0	0	1	0	0	0	1	1	0	0	0	0	0	0.933333
1	31.2822	1	1	0	0	0	0	0			27	4147000	1	1	1	6	0	0	1	0	0	0	0	0	1	0	0	0	0	0	0	0	0	0	0	6
1	23.989	1	1	0	0	0	0	0			286	52600	0	0	1	6	0	0	1	0	0	0	0	0	1	0	0	0	0	0	0	0	0	0	0	6
1	23.4356	1	1	0	0	0	0	0			140	651400	1	1	1	6	0	0	1	0	0	0	0	0	1	0	0	0	0	0	0	0	0	0	0	6
1	28.411	1	1	0	0	0	0	0			201	115200	0	0	1	6	0	0	1	0	0	0	0	0	1	0	0	0	1	1	0	0	0	0	0	2.33333
1	26.6411	0	0	0	1	0	0	1			419	17146	0	0	1	6	0	0	1	0	0	0	0	0	1	0	0	0	1	1	0	0	0	0	0	3.1
1	22.6685	1	1	0	0	0	0	0			460	34915	0	0	1	6	0	0	1	0	0	0	0	0	1	0	0	0	1	1	0	0	0	0	0	0.933333
1	30.8877	1	0	0	1	0	0	1			459	37584	0	0	1	6	0	0	1	0	0	0	0	0	1	0	0	0	0	0	0	0	0	0	0	6
1	35.6301	1	1	0	0	0	0	0			472	39627	0	0	1	6	0	0	1	0	0	0	0	0	1	0	0	0	0	0	0	0	0	0	0	6
1	28.1973	1	1	0	0	0	0	0			283	30648	0	0	1	6	0	0	1	0	0	0	0	0	1	0	0	0	1	1	0	0	0	0	0	0.933333
1	28.9863	1	1	0	0	0	0	0			248	59871	0	0	1	6	0	0	1	0	0	0	0	0	1	0	0	0	0	0	0	0	0	0	0	6
1	42.0164	1	0	0	1	0	0	1			537	86440	0	0	0	6	0	0	1	0	0	0	0	0	1	0	0	0	0	0	0	0	0	0	0	6
1	51.0055	1	0	0	1	0	0	1			317	14133	0	0	1	6	0	0	1	0	0	0	0	0	1	0	0	0	1	1	0	0	0	0	0	4.66667
1	29.0274	1	0	0	1	0	0	1			386	1860	0	0	1	6	0	0	1	0	0	0	0	0	1	0	0	0	0	0	0	0	0	0	0	6
1	23.0767	1	1	0	0	0	0	0			170	149900	0	1	1	6	0	0	1	0	0	0	0	0	1	0	0	0	0	0	0	0	0	0	0	6
1	54.2082	0	0	0	1	0	0	1			291	76695	0	0	1	6	0	0	1	0	0	0	0	0	1	0	0	0	1	1	0	0	0	0	0	0.8
1	32.5836	1	1	0	0	0	1	0			188	21058	0	1	1	6	0	0	1	0	0	0	0	0	1	0	0	0	1	1	0	0	0	0	0	1.06667
1	50.5041	1	0	0	1	0	0	1			294	473800	0	0	1	6	0	0	1	0	0	0	0	0	1	0	0	0	0	0	0	0	0	0	0	6
1	22.0493	1	1	0	0	0	0	1			283	69026	0	0	1	6	0	0	1	0	0	0	0	0	1	0	0	0	1	1	0	0	0	0	0	5.43333
1	20.2055	1	1	0	0	0	0	0			66	1207000	1	1	1	6	0	0	1	0	0	0	0	0	1	0	0	0	1	0	0	0	0	1	0	5.36667
1	20.5836	1	1	0	0	0	0	0			381	110000	0	0	1	6	0	0	1	0	0	0	0	0	1	0	0	0	1	0	0	0	0	1	0	1.63333
1	26.2932	1	1	0	0	0	0	0			288	103100	0	0	1	6	0	0	1	0	0	0	0	0	1	0	0	0	1	1	0	0	0	0	0	5.13333
1	28.6767	1	1	0	0	0	0	0			190	81560	0	1	1	6	0	0	1	0	0	0	0	0	1	0	0	0	1	1	0	0	0	0	0	1.93333
1	46.2849	1	0	0	1	0	1	1			349.7	138800	0	0	1	6	0	0	1	0	0	0	0	0	1	0	0	0	0	0	0	0	0	0	0	6
1	18.663	1	1	0	0	0	0	0			287	28911	0	0	1	6	0	0	1	0	0	0	0	0	1	0	0	0	1	0	0	0	0	1	0	1.86667
1	31.3863	1	0	0	0	1	0	0			277	8925	0	0	1	6	0	0	1	0	0	0	0	0	1	0	0	0	1	0	0	0	0	1	0	1.86667
1	32.4438	1	1	0	0	0	0	0			285	347000	0	0	1	6	0	0	1	0	0	0	0	0	0	1	0	0	0	0	0	0	0	0	0	6
1	47.2384	0	0	0	1	0	0	1			338	198000	0	0	1	6	0	0	1	0	0	0	0	0	1	0	0	0	1	0	0	0	0	1	0	2.1
1	38.0822	1	1	0	0	0	0	0			401	111500	0	0	1	6	0	0	1	0	0	0	0	0	1	0	0	0	1	1	0	0	0	0	0	0.866667
1	26.6575	1	1	0	0	0	0	0			282	125000	0	0	1	6	0	0	1	0	0	0	0	0	1	0	0	0	1	0	0	0	0	1	0	0.7
1	50.274	0	0	0	1	0	0	1			152	1400	0	1	1	6	0	0	1	0	0	0	0	0	1	0	0	0	1	1	0	0	0	0	0	2.1
1	36.3699	1	0	0	1	0	0	1			167.5	2027	0	1	1	6	0	0	1	0	0	0	0	0	0	1	0	0	1	1	0	0	0	0	0	2.56667
1	40.9945	1	1	0	0	0	0	0			258	44323	0	0	1	6	0	0	1	0	0	0	0	0	1	0	0	0	0	0	0	0	0	0	0	6
1	35.4603	1	0	0	1	0	0	1			230	3500	0	0	1	6	0	0	1	0	0	0	0	0	1	0	0	0	1	1	0	0	0	0	0	2.56667
1	39.1096	0	0	0	1	0	0	1			193	67200	0	1	1	6	0	0	1	0	0	0	0	0	1	0	0	0	0	0	0	0	0	0	0	6
1	47.6027	1	0	0	1	0	0	1			275	47827	0	0	1	6	0	0	1	0	0	0	0	0	1	0	0	0	1	1	0	0	0	0	0	2.8
1	23.1178	1	1	0	0	0	0	0			553	58537	0	0	0	6	0	0	1	0	0	0	0	0	1	0	0	0	0	0	0	0	0	0	0	6
1	23.2712	1	1	0	0	0	0	0			2	4933000	1	1	1	6	0	0	1	0	0	0	0	0	1	0	0	0	1	0	1	1	0	0	0	4.66667
1	46.3205	0	0	0	1	0	0	1			120	3168	0	1	1	6	0	0	1	0	0	0	0	0	1	0	0	0	0	0	0	0	0	0	0	6
1	31.011	1	1	0	0	0	0	0			93	92029	0	1	1	6	0	0	1	0	0	0	0	0	1	0	0	0	1	1	0	0	0	0	0	1.56667
1	30.9342	1	1	0	0	0	1	0			19	168800	0	1	1	6	0	0	1	0	0	0	0	0	0	1	0	0	0	0	0	0	0	0	0	6
1	24.8575	1	1	0	0	0	0	0			309	209500	0	0	1	6	0	0	1	0	0	0	0	0	1	0	0	0	1	1	0	0	0	0	0	0.933333
1	34.7041	1	0	0	1	0	0	1			261	92678	0	0	1	6	0	0	1	0	0	0	0	0	1	0	0	0	1	1	0	0	0	0	0	4.9
1	40.2384	1	0	0	1	0	0	1			190	32380	0	1	1	6	0	0	1	0	0	0	0	0	1	0	0	0	1	1	0	0	0	0	0	3.26667
1	34.5753	1	0	0	1	0	0	0			523.4	12288	0	0	0	6	0	0	1	0	0	0	0	0	1	0	0	0	1	1	0	0	0	0	0	3.73333
1	44.789	1	0	0	1	0	0	1			419	9400	0	0	1	6	0	0	1	0	0	0	0	0	1	0	0	0	1	1	0	0	0	0	0	3.73333
1	39.1068	0	0	0	1	0	1	1			307	3544	0	0	1	6	0	0	1	0	0	0	0	0	1	0	0	0	1	1	0	0	0	0	0	1.5
1	37.0164	1	1	0	0	0	0	0			295	175700	0	0	1	6	0	0	1	0	0	0	0	0	1	0	0	0	1	1	0	0	0	0	0	3.03333
1	45.3233	1	0	0	1	0	1	1			133	30486	0	1	1	6	0	0	1	0	0	0	0	0	1	0	0	0	1	0	0	0	0	1	0	0.933333
1	48.1781	1	0	0	1	0	0	1			121	858000	0	1	1	6	0	0	1	0	0	0	0	0	0	1	0	0	0	0	0	0	0	0	0	6
1	22.5589	1	1	0	0	0	0	0			239	83579	0	0	1	6	0	0	1	0	0	0	0	0	1	0	0	0	1	1	0	0	0	0	0	3.73333
1	34.5644	1	1	0	0	0	0	0			314	21590	0	0	1	6	0	0	1	0	0	0	0	0	1	0	0	0	0	0	0	0	0	0	0	6
1	43.9863	1	0	0	1	0	0	1			288	3458	0	0	1	6	0	0	1	0	0	0	0	0	1	0	0	0	1	1	0	0	0	0	0	1.4
1	33.3534	1	0	0	1	0	0	1			373	1289	0	0	1	6	0	0	1	0	0	0	0	0	1	0	0	0	1	0	0	0	0	1	0	3.73333
1	27.0384	1	0	0	0	1	0	0			173	9068	0	1	1	6	0	0	1	0	0	0	0	0	1	0	0	0	0	0	0	0	0	0	0	6
1	38.7151	1	1	0	0	0	0	0			280	70988	0	0	1	6	0	0	1	0	0	0	0	0	1	0	0	0	0	0	0	0	0	0	0	6
1	25.7507	1	1	0	0	0	0	0			439	54487	0	0	1	6	0	0	1	0	0	0	0	0	1	0	0	0	1	1	0	0	0	0	0	0.466667
1	24.211	1	1	0	0	0	0	0			364	10426	0	0	1	6	0	0	1	0	0	0	0	0	1	0	0	0	0	0	0	0	0	0	0	6
1	32.9397	1	1	0	0	0	0	0			54	1586000	1	1	1	6	0	0	1	0	0	0	0	0	1	0	0	0	0	0	0	0	0	0	0	6
1	35.8904	1	1	0	0	0	1	0			8	726700	1	1	1	6	0	0	1	0	0	0	0	0	1	0	0	0	0	0	0	0	0	0	0	6
1	34.326	1	1	0	0	0	0	0			8	113300	1	1	1	6	0	0	1	0	0	0	0	0	0	1	0	0	1	1	0	0	0	0	0	1.86667
1	44.3288	1	0	0	1	0	0	1			674	116400	0	0	0	6	0	0	1	0	0	0	0	0	1	0	0	0	1	1	0	0	0	0	0	0.366667
1	25.9397	1	1	0	0	0	0	0			336	19950	0	0	1	6	0	0	1	0	0	0	0	0	1	0	0	0	1	1	0	0	0	0	0	1.23333
1	27.9945	1	1	0	0	0	0	0			624	263900	0	0	0	6	0	0	1	0	0	0	0	0	1	0	0	0	1	1	0	0	0	0	0	0.7
1	48.9425	1	0	0	1	0	1	1			194	20350	0	1	1	6	0	0	1	0	0	0	0	0	1	0	0	0	0	0	0	0	0	0	0	6
1	37.1808	1	1	0	0	0	0	0			208	492200	0	0	1	6	0	0	1	0	0	0	0	0	1	0	0	0	1	1	0	0	0	0	0	1.03333
1	46.5479	1	1	0	0	0	0	0			247	40851	0	0	1	6	0	0	1	0	0	0	0	0	1	0	0	0	1	1	0	0	0	0	0	4.66667
1	28.7644	1	1	0	0	0	0	0			136	24847	0	1	1	6	0	0	1	0	0	0	0	0	1	0	0	0	1	0	1	1	0	0	0	1.93333
1	32.8137	1	0	1	0	0	0	0			9	116000	1	1	1	6	0	0	1	0	0	0	0	0	0	1	0	0	1	1	0	0	0	0	0	0.533333
1	47.789	1	0	0	1	0	0	1			251	34758	0	0	1	6	0	0	1	0	0	0	0	0	1	0	0	0	1	1	0	0	0	0	0	0.933333
1	33.4329	1	1	0	0	0	1	0			385	41014	0	0	1	6	0	0	1	0	0	0	0	0	1	0	0	0	0	0	0	0	0	0	0	6
1	23.0712	1	1	0	0	0	0	0			47	5062000	1	1	1	6	0	0	1	0	0	0	0	0	1	0	0	0	1	1	0	0	0	0	0	2.4
1	28.0055	1	1	0	0	0	0	0			4	20309	1	1	1	6	0	0	1	0	0	0	0	0	1	0	0	0	1	1	0	0	0	0	0	0.3
1	30.411	1	1	0	0	0	0	0			194	19360	0	1	1	6	0	0	1	0	0	0	0	0	1	0	0	0	1	1	0	0	0	0	0	0.933333
1	22.9096	1	1	0	0	0	0	0			330	6547	0	0	1	6	0	0	1	0	0	0	0	0	1	0	0	0	1	1	0	0	0	0	0	0.233333
1	34.3973	1	0	0	1	0	0	0			290	15727	0	0	1	1.86667	0	0	1	0	0	0	0	0	1	0	0	0	1	0	1	0	1	0	0	1.9
1	41.5753	0	0	0	1	0	0	1			306	44462	0	0	1	6	0	0	1	0	0	0	0	0	1	0	0	0	1	1	0	0	0	0	0	5.6
1	37.9863	1	0	0	1	0	0	1			624.2	1431	0	0	0	2.66667	0	0	1	0	0	0	0	0	1	0	0	0	1	1	0	0	0	0	0	2.1
1	28.1562	1	1	0	0	0	1	0			203	289000	0	0	1	6	0	0	1	0	0	0	0	0	1	0	0	0	1	0	0	0	0	1	0	3.73333
1	35.0767	0	0	0	1	0	0	1			174	34173	0	1	1	6	0	0	1	0	0	0	0	0	1	0	0	0	0	0	0	0	0	0	0	6
1	27.0712	1	1	0	0	0	0	0			36	372300	1	1	1	6	0	0	1	0	0	0	0	0	1	0	0	0	1	1	0	0	0	0	0	2.4
1	25.2247	1	1	0	0	0	0	0			499	60549	0	0	1	6	0	0	1	0	0	0	0	0	1	0	0	0	1	1	0	0	0	0	0	1.86667
1	21.8247	1	1	0	0	0	0	0			310	12547	0	0	1	6	0	0	1	0	0	0	0	0	1	0	0	0	1	0	1	1	0	0	0	0.433333
1	35.8712	1	0	0	1	0	0	1			255	29631	0	0	1	6	0	0	1	0	0	0	0	0	1	0	0	0	0	0	0	0	0	0	0	6
1	54.8767	1	1	0	0	0	0	0			276	18484	0	0	1	6	0	0	1	0	0	0	0	0	1	0	0	0	1	1	0	0	0	0	0	1.86667
1	41.0356	0	0	0	1	0	0	1			355	21347	0	0	1	6	0	0	1	0	0	0	0	0	1	0	0	0	1	1	0	0	0	0	0	1.16667
1	45.4384	1	0	0	1	0	1	1			323	27667	0	0	1	6	0	0	1	0	0	0	0	0	1	0	0	0	1	1	0	0	0	0	0	0.733333
1	38.926	0	0	0	1	0	0	1			256	14923	0	0	1	6	0	0	1	0	0	0	0	0	1	0	0	0	0	0	0	0	0	0	0	6
1	24.3151	1	1	0	0	0	0	0			366	108600	0	0	1	6	0	0	1	0	0	0	0	0	0	1	0	0	1	1	0	0	0	0	0	0.933333
1	53.3726	1	0	0	1	0	0	1			731	74613	0	0	0	6	0	0	1	0	0	0	0	0	1	0	0	0	1	1	0	0	0	0	0	0.7
1	26.789	1	1	0	0	0	1	0			194	41012	1	1	1	3.03333	0	0	1	0	0	0	0	0	1	0	0	0	1	0	1	0	1	0	0	3
1	26.8849	1	1	0	0	0	0	0			11	79025	0	1	1	6	0	0	1	0	0	0	0	0	1	0	0	0	1	1	0	0	0	0	0	0.4
1	46.1918	1	0	0	1	0	0	1			450	169400	0	0	1	6	0	0	1	0	0	0	0	0	1	0	0	0	0	0	0	0	0	0	0	6
1	48.5644	0	0	0	1	0	0	1			358	12802	0	0	1	6	0	0	1	0	0	0	0	0	1	0	0	0	1	1	0	0	0	0	0	0.566667
1	21.4877	1	1	0	0	0	0	0			65	396612	0	1	1	6	0	0	1	0	0	0	0	0	1	0	0	0	0	0	0	0	0	0	0	6
1	22.7068	1	1	0	0	0	0	0			191	35964	0	1	1	6	0	0	1	0	0	0	0	0	1	0	0	0	1	1	0	0	0	0	0	0.0666667
1	55.9397	1	1	0	0	0	0	1			377	6362	0	0	1	3.1	0	0	0	1	0	0	0	0	1	0	0	0	1	1	0	0	0	0	0	1.46667
1	23.411	1	1	0	0	0	0	0			209	62502	0	0	1	6	0	0	0	1	0	0	0	0	1	0	0	0	1	1	0	0	0	0	0	1.03333
1	26.663	1	1	0	0	0	0	0			204	32308	0	0	1	6	0	0	0	1	0	0	0	0	1	0	0	0	1	1	0	0	0	0	0	1.63333
1	23.3452	1	1	0	0	0	0	0			450	371500	0	0	1	6	0	0	0	1	0	0	0	0	1	0	0	0	1	1	0	0	0	0	0	2.8
1	38.5233	1	0	0	1	0	0	1			882	3761	0	0	0	6	0	0	0	1	0	0	0	0	1	0	0	0	1	1	0	0	0	0	0	2.1
1	36.9452	1	0	0	1	0	0	1			1092	12108	0	0	0	6	0	0	0	1	0	0	0	0	0	0	1	0	1	1	0	0	0	0	0	1.5
1	35.5589	0	0	0	1	0	0	1			570	15505	0	0	0	6	0	0	0	1	0	0	0	0	1	0	0	0	1	1	0	0	0	0	0	2.9
1	29.1808	1	1	0	0	0	0	0			517	56548	0	0	0	6	0	0	0	1	0	0	0	0	0	1	0	0	1	1	0	0	0	0	0	3.5
1	33.0658	1	0	0	1	0	0	1			176	128100	0	1	1	6	0	0	0	1	0	0	0	0	1	0	0	0	1	1	0	0	0	0	0	2.56667
1	37.2274	1	0	0	1	0	0	1			1240	90	0	0	0	6	0	0	0	1	0	0	0	0	0	1	0	0	0	0	0	0	0	0	0	6
1	32.0027	1	1	0	0	0	0	0			432	107900	0	0	1	6	0	0	0	1	0	0	0	0	0	1	0	0	1	1	0	0	0	0	0	2.56667
1	49.2712	1	0	0	1	0	0	1			284	10300	0	0	1	6	0	0	0	1	0	0	0	0	1	0	0	0	1	1	0	0	0	0	0	3.26667
1	29.6603	1	1	0	0	0	1	0			55	223000	0	1	1	6	0	0	0	1	0	0	0	0	1	0	0	0	1	0	1	1	0	0	0	0.7
1	41.9699	1	0	0	1	0	0	1			484	1458	0	0	1	6	0	0	0	1	0	0	0	0	1	0	0	0	0	0	0	0	0	0	0	6
1	29.5616	1	1	0	0	0	0	0			340	154100	0	0	1	2.46667	0	0	0	1	0	0	0	0	1	0	0	0	1	0	1	0	1	0	0	2.5
1	36.5699	1	0	0	1	0	0	1			515	17009	0	0	0	6	0	0	0	1	0	0	0	0	1	0	0	0	0	0	0	0	0	0	0	6
1	40.3534	1	0	0	1	0	0	1			229	22016	0	0	1	6	0	0	0	1	0	0	0	0	1	0	0	0	1	1	0	0	0	0	0	1.63333
1	44.3699	1	0	0	1	0	0	1			361	35744	0	0	1	3.96667	0	0	0	1	0	0	0	0	1	0	0	0	1	0	1	0	1	0	0	4
1	45.2521	1	0	0	1	0	0	1			464	2622	0	0	1	6	0	0	0	1	0	0	0	0	1	0	0	0	0	0	0	0	0	0	0	6
1	25.7562	1	1	0	0	0	0	0			363	43707	0	0	1	6	0	0	0	1	0	0	0	0	1	0	0	0	0	0	0	0	0	0	0	6
1	33.3397	1	1	0	0	0	1	0			9	806400	1	1	1	6	0	0	0	1	0	0	0	0	1	0	0	0	0	0	0	0	0	0	0	6
1	30.2219	1	0	0	1	0	0	1			105	6056	0	1	1	6	0	0	0	1	0	0	0	0	1	0	0	0	1	1	0	0	0	0	0	1.16667
1	29.7014	1	1	0	0	0	0	0			401	297600	0	0	1	6	0	0	0	1	0	0	0	0	0	1	0	0	0	0	0	0	0	0	0	6
1	38.3918	1	0	0	1	0	0	1			280	39718	0	0	1	6	0	0	0	1	0	0	0	0	0	1	0	0	1	1	0	0	0	0	0	2.56667
1	28.2521	1	1	0	0	0	0	0			131	139800	0	1	1	6	0	0	0	1	0	0	0	0	1	0	0	0	1	1	0	0	0	0	0	0.3
1	29.137	1	1	0	0	0	0	0			349	17908	0	0	1	6	0	0	0	1	0	0	0	0	1	0	0	0	0	0	0	0	0	0	0	6
1	45.4329	1	1	0	0	0	0	0			16	663200	1	1	1	6	0	0	0	1	0	0	0	0	1	0	0	0	1	1	0	0	0	0	0	0.4
1	32.1397	1	1	0	0	0	0	0			331	11668	0	0	1	6	0	0	0	1	0	0	0	0	1	0	0	0	0	0	0	0	0	0	0	6
1	27.2438	1	1	0	0	0	0	0			335	33523	0	0	1	6	0	0	0	1	0	0	0	0	1	0	0	0	0	0	0	0	0	0	0	6
1	21.063	1	1	0	0	0	0	0			270	209500	0	0	1	6	0	0	0	1	0	0	0	0	1	0	0	0	0	0	0	0	0	0	0	6
1	40.0603	1	1	0	0	0	1	0			833	30319	0	0	0	6	0	0	0	1	0	0	0	0	1	0	0	0	1	1	0	0	0	0	0	1.16667
1	29.2411	1	1	0	0	0	0	0			348	26984	0	0	1	6	0	0	0	1	0	0	0	0	1	0	0	0	0	0	0	0	0	0	0	6
1	33.2493	1	1	0	0	0	0	0			404	8266	0	0	1	6	0	0	0	1	0	0	0	0	1	0	0	0	1	1	0	0	0	0	0	1.86667
1	21.4411	1	0	1	0	0	0	0			262	38105	0	0	1	6	0	0	0	1	0	0	0	0	1	0	0	0	0	0	0	0	0	0	0	6
1	36.5425	1	1	0	0	0	1	0			237	44184	0	0	1	6	0	0	0	1	0	0	0	0	1	0	0	0	0	0	0	0	0	0	0	6
1	34.8055	1	0	0	1	0	1	1			414	17584	0	0	1	6	0	0	0	1	0	0	0	0	1	0	0	0	0	0	0	0	0	0	0	6
1	29.5452	1	1	0	0	0	0	0			271	25137	0	0	1	6	0	0	0	1	0	0	0	0	1	0	0	0	0	0	0	0	0	0	0	6
1	29.2986	1	1	0	0	0	0	1			381	28922	0	0	1	6	0	0	0	1	0	0	0	0	1	0	0	0	0	0	0	0	0	0	0	6
1	31.6164	0	0	0	1	0	0	1			745	30725	0	0	0	6	0	0	0	1	0	0	0	0	1	0	0	0	1	1	0	0	0	0	0	0.466667
1	33.5836	1	0	1	0	0	0	0			199	96572	1	1	1	6	0	0	0	1	0	0	0	0	1	0	0	0	0	0	0	0	0	0	0	6
1	34.337	0	0	0	1	0	0	1			179	54627	1	1	1	6	0	0	0	1	0	0	0	0	1	0	0	0	0	0	0	0	0	0	0	6
1	23.4192	1	1	0	0	0	0	0			360	26211	0	0	1	6	0	0	0	1	0	0	0	0	1	0	0	0	0	0	0	0	0	0	0	6
1	43.6986	0	0	0	1	0	1	1			237	15703	0	0	1	6	0	0	0	1	0	0	0	0	1	0	0	0	0	0	0	0	0	0	0	6
1	23.6219	1	1	0	0	0	0	0			919	2629	0	0	0	6	0	0	0	1	0	0	0	0	1	0	0	0	0	0	0	0	0	0	0	6
1	26.8767	1	1	0	0	0	0	0			9	115500	1	1	1	6	0	0	0	1	0	0	0	0	1	0	0	0	1	1	0	0	0	0	0	0.466667
1	29.1781	1	1	0	0	0	0	0			258	40988	0	0	1	4.1	0	0	0	1	0	0	0	0	1	0	0	0	1	0	1	0	1	0	0	4.1
1	52.3479	0	0	0	1	0	0	1			155	440700	0	1	1	6	0	0	0	1	0	0	0	0	1	0	0	0	1	1	0	0	0	0	0	1.16667
1	42.5096	1	0	0	1	0	1	1			721	12157	0	0	0	6	0	0	0	1	0	0	0	0	1	0	0	0	0	0	0	0	0	0	0	6
1	28.9863	1	1	0	0	0	0	0			5	3346000	1	1	1	6	0	0	0	1	0	0	0	0	0	1	0	0	0	0	0	0	0	0	0	6
1	41.0932	1	0	0	1	0	1	1			205	7049	0	0	1	6	0	0	0	1	0	0	0	0	1	0	0	0	0	0	0	0	0	0	0	6
1	26.0877	1	0	0	1	0	0	1			365	539	0	0	1	6	0	0	0	1	0	0	0	0	1	0	0	0	1	1	0	0	0	0	0	2.8
1	29.7041	1	0	0	1	0	0	1			573	2684	0	0	0	6	0	0	0	1	0	0	0	0	1	0	0	0	0	0	0	0	0	0	0	6
1	32.1425	1	1	0	0	0	0	0			95	1669000	1	1	1	6	0	0	0	1	0	0	0	0	1	0	0	0	0	0	0	0	0	0	0	6
1	30.2548	1	1	0	0	0	0	0			305	28456	0	0	1	6	0	0	0	1	0	0	0	0	1	0	0	0	0	0	0	0	0	0	0	6
1	29.6712	1	1	0	0	0	0	0			449	349	0	0	1	6	0	0	0	1	0	0	0	0	1	0	0	0	1	1	0	0	0	0	0	5.66667
1	28.9288	1	1	0	0	0	0	0			308	40370	0	0	1	6	0	0	0	1	0	0	0	0	1	0	0	0	1	1	0	0	0	0	0	1.63333
1	28.0329	1	1	0	0	0	1	0			1	92811	1	1	1	6	0	0	0	1	0	0	0	0	1	0	0	0	0	0	0	0	0	0	0	6
1	29.3753	1	1	0	0	0	0	0			33	232200	1	1	1	6	0	0	0	1	0	0	0	0	1	0	0	0	0	0	0	0	0	0	0	6
1	33.3425	1	1	0	0	0	0	0			376	18136	0	0	1	6	0	0	0	1	0	0	0	0	1	0	0	0	1	0	0	0	0	1	0	0.466667
1	21.5726	0	0	0	1	0	0	0			588	1663	0	0	0	6	0	0	0	1	0	0	0	0	1	0	0	0	0	0	0	0	0	0	0	6
1	45.3945	1	0	0	1	0	1	1			253	1611	0	0	1	6	0	0	0	1	0	0	0	0	1	0	0	0	0	0	0	0	0	0	0	6
1	41.0356	1	1	0	0	0	0	0			145	102600	0	1	1	6	0	0	0	1	0	0	0	0	1	0	0	0	0	0	0	0	0	0	0	6
1	47.6137	1	1	0	0	0	0	0			57	185300	1	1	1	6	0	0	0	1	0	0	0	0	1	0	0	0	1	1	0	0	0	0	0	1.96667
1	41.526	1	0	0	1	0	1	1			269	95931	0	0	1	6	0	0	0	1	0	0	0	0	1	0	0	0	0	0	0	0	0	0	0	6
1	31.5315	0	0	0	1	0	0	1			462	6754	0	0	1	6	0	0	0	1	0	0	0	0	1	0	0	0	0	0	0	0	0	0	0	6
1	25.3342	1	1	0	0	0	0	0			257	161800	0	0	1	6	0	0	0	1	0	0	0	0	1	0	0	0	0	0	0	0	0	0	0	6
1	38.0932	0	0	0	1	0	0	1			542	3371	0	0	0	6	0	0	0	1	0	0	0	0	1	0	0	0	0	0	0	0	0	0	0	6
1	23.1014	1	1	0	0	0	0	0			315	8419	0	0	1	6	0	0	0	1	0	0	0	0	1	0	0	0	0	0	0	0	0	0	0	6
1	35.274	0	0	0	1	0	0	1			581	35718	0	0	0	6	0	0	0	1	0	0	0	0	1	0	0	0	0	0	0	0	0	0	0	6
1	39.6466	1	1	0	0	0	1	0			46	285100	1	1	1	6	0	0	0	1	0	0	0	0	1	0	0	0	0	0	0	0	0	0	0	6
1	28	1	1	0	0	0	0	0			66	15960000	1	1	1	0.633333	0	0	0	1	0	0	0	0	1	0	0	1	0	0	0	0	0	0	0	0.6
1	35.9562	1	0	0	1	0	1	1			250	59963	0	0	1	6	0	0	0	1	0	0	0	0	1	0	0	0	0	0	0	0	0	0	0	6
1	38.9205	1	0	0	1	0	0	1			454	28474	0	0	1	6	0	0	0	1	0	0	0	0	1	0	0	0	0	0	0	0	0	0	0	6
1	22.4959	1	0	1	0	0	0	0			692	38352	0	0	0	6	0	0	0	1	0	0	0	0	1	0	0	0	0	0	0	0	0	0	0	6
1	24.1589	1	1	0	0	0	0	0			331	9946	0	0	1	6	0	0	0	1	0	0	0	0	1	0	0	0	0	0	0	0	0	0	0	6
1	46.6137	1	0	0	1	0	0	1			247	100400	0	0	1	6	0	0	0	1	0	0	0	0	1	0	0	0	1	1	0	0	0	0	0	1.4
1	30.3123	1	1	0	0	0	1	0			190	190000	0	1	1	4.9	0	0	0	1	0	0	0	0	1	0	0	0	1	1	0	0	0	0	0	4.43333
1	48.7863	1	0	0	1	0	0	1			441	7313	0	0	1	6	0	0	0	1	0	0	0	0	1	0	0	0	0	0	0	0	0	0	0	6
1	39.989	1	1	0	0	0	0	0			315	48484	0	0	1	6	0	0	0	1	0	0	0	0	1	0	0	0	0	0	0	0	0	0	0	6
1	24.7918	1	1	0	0	0	0	0			306	118600	0	0	1	1.83333	0	0	0	1	0	0	0	0	1	0	0	0	1	0	1	0	1	0	0	1.8
1	46.7315	1	0	0	1	0	0	1			309	346900	0	0	1	6	0	0	0	1	0	0	0	0	0	1	0	0	1	1	0	0	0	0	0	2.33333
1	31.8493	1	1	0	0	0	0	0			282	59216	0	0	1	6	0	0	0	1	0	0	0	0	1	0	0	0	1	1	0	0	0	0	0	0.933333
1	28.0795	1	1	0	0	0	0	0			286	1683000	0	0	1	6	0	0	0	1	0	0	0	0	1	0	0	0	1	0	0	0	0	1	0	0.466667
1	35.0849	1	0	0	1	0	1	1			279	8437	0	0	1	6	0	0	0	1	0	0	0	0	1	0	0	0	0	0	0	0	0	0	0	6
1	37.4849	1	0	0	1	0	0	1			282	20470	0	0	1	6	0	0	0	1	0	0	0	0	1	0	0	0	1	1	0	0	0	0	0	1.4
1	37.2301	1	0	0	1	0	1	1			399	9371	0	0	1	6	0	0	0	1	0	0	0	0	1	0	0	0	0	0	0	0	0	0	0	6
1	35.5671	1	0	0	1	0	0	1			709	120800	0	0	0	6	0	0	0	1	0	0	0	0	1	0	0	0	1	1	0	0	0	0	0	5
1	26.3397	1	1	0	0	0	0	0			419	64141	0	0	1	6	0	0	0	1	0	0	0	0	1	0	0	0	0	0	0	0	0	0	0	6
1	40.9808	1	1	0	0	0	0	0			177	42088	0	1	1	6	0	0	0	1	0	0	0	0	1	0	0	0	1	1	0	0	0	0	0	0.933333
1	31.6904	1	1	0	0	0	0	0			272	8422	0	0	1	6	0	0	0	1	0	0	0	0	1	0	0	0	0	0	0	0	0	0	0	6
1	31.4658	1	1	0	0	0	0	0			83	487800	1	1	1	6	0	0	0	1	0	0	0	0	1	0	0	0	1	1	0	0	0	0	0	0.933333
1	42.1781	1	1	0	0	0	0	0			161	32934	0	1	1	6	0	0	0	1	0	0	0	0	1	0	0	0	1	1	0	0	0	0	0	1.86667
1	30.7808	1	1	0	0	0	0	0			218	19169	0	0	1	6	0	0	0	1	0	0	0	0	1	0	0	0	0	0	0	0	0	0	0	6
1	37.4411	1	1	0	0	0	0	0			437	3513	1	1	1	6	0	0	0	1	0	0	0	0	1	0	0	0	0	0	0	0	0	0	0	6
1	37.9945	1	0	0	1	0	0	1			600	103800	0	0	0	6	0	0	0	1	0	0	0	0	1	0	0	0	1	1	0	0	0	0	0	1.86667
1	33.2877	1	1	0	0	0	0	0			2	1683000	1	1	1	6	0	0	0	1	0	0	0	0	1	0	0	0	1	1	0	0	0	0	0	0.466667
1	29.7726	0	0	0	1	0	0	1			391	3345	0	0	1	6	0	0	0	1	0	0	0	0	1	0	0	0	1	1	0	0	0	0	0	1.16667
1	24.5945	1	1	0	0	0	1	0			478	342	0	0	1	6	0	0	0	1	0	0	0	0	1	0	0	0	0	0	0	0	0	0	0	6
1	37.4301	1	0	0	1	0	0	1			462	5943	0	0	1	6	0	0	0	1	0	0	0	0	1	0	0	0	0	0	0	0	0	0	0	6
1	30.5616	1	1	0	0	0	0	0			211	92326	0	0	1	6	0	0	0	1	0	0	0	0	1	0	0	0	0	0	0	0	0	0	0	6
1	20.7233	1	1	0	0	0	0	0			182	41129	0	1	1	6	0	0	0	1	0	0	0	0	1	0	0	0	0	0	0	0	0	0	0	6
1	22.4466	1	1	0	0	0	0	0			329	15765	0	0	1	6	0	0	0	1	0	0	0	0	1	0	0	0	1	1	0	0	0	0	0	3.5
1	31.5562	1	1	0	0	0	1	0			554	27572	0	0	0	6	0	0	0	1	0	0	0	0	1	0	0	0	1	1	0	0	0	0	0	0.7
1	25.8164	1	1	0	0	0	0	0			226	131800	0	0	1	6	0	0	0	1	0	0	0	0	1	0	0	0	1	1	0	0	0	0	0	0.366667
1	32.5233	1	1	0	0	0	1	0			306	20719	0	0	1	6	0	0	0	1	0	0	0	0	1	0	0	0	0	0	0	0	0	0	0	6
1	30.8904	1	1	0	0	0	0	0			238	11949	0	0	1	6	0	0	0	1	0	0	0	0	1	0	0	0	1	1	0	0	0	0	0	4.93333
1	32.3014	1	0	0	0	1	1	0			38	150100	0	1	1	6	0	0	0	1	0	0	0	0	1	0	0	0	1	1	0	0	0	0	0	1.66667
1	25.5534	1	1	0	0	0	0	0			310	24960	0	0	1	6	0	0	0	1	0	0	0	0	1	0	0	0	1	1	0	0	0	0	0	2.56667
1	34.1014	1	1	0	0	0	0	0			80	112500	0	1	1	6	0	0	0	1	0	0	0	0	1	0	0	0	1	1	0	0	0	0	0	2.33333
1	28.0192	1	1	0	0	0	0	0			423	37848	0	0	1	6	0	0	0	1	0	0	0	0	1	0	0	0	0	0	0	0	0	0	0	6
1	21.9425	1	1	0	0	0	0	0			357	115700	0	0	1	6	0	0	0	1	0	0	0	0	1	0	0	0	0	0	0	0	0	0	0	6
1	38.4822	1	0	0	1	0	1	1			654	48013	0	0	0	6	0	0	0	1	0	0	0	0	1	0	0	0	1	1	0	0	0	0	0	6
1	26.4959	1	1	0	0	0	0	0			35	114700	0	1	1	6	0	0	0	1	0	0	0	0	0	0	1	0	1	0	1	1	0	0	0	1.86667
1	24.8082	1	1	0	0	0	0	0			291	32887	0	0	1	6	0	0	0	1	0	0	0	0	1	0	0	0	0	0	0	0	0	0	0	6
1	34.8767	1	1	0	0	0	0	0			124	12888	0	1	1	6	0	0	0	1	0	0	0	0	1	0	0	0	0	0	0	0	0	0	0	6
1	23.9151	1	1	0	0	0	0	0			391	10371	0	0	1	6	0	0	0	1	0	0	0	0	1	0	0	0	0	0	0	0	0	0	0	6
1	31.0575	1	1	0	0	0	0	0			212	183000	0	0	1	6	0	0	0	1	0	0	0	0	1	0	0	0	1	1	0	0	0	0	0	6
1	31.2712	1	1	0	0	0	0	0			20	142000	1	1	1	6	0	0	0	1	0	0	0	0	1	0	0	0	1	1	0	0	0	0	0	0.466667
1	36.074	1	0	0	1	0	0	1			263	6116	0	0	1	6	0	0	0	1	0	0	0	0	1	0	0	0	0	0	0	0	0	0	0	6
1	38.0986	1	0	0	1	0	0	1			335	1077	0	0	1	6	0	0	0	1	0	0	0	0	1	0	0	0	0	0	0	0	0	0	0	6
1	43.1342	1	0	0	1	0	0	1			219	25539	0	0	1	6	0	0	0	1	0	0	0	0	1	0	0	0	0	0	0	0	0	0	0	6
1	35.4795	1	0	0	1	0	0	1			388	22428	0	0	1	6	0	0	0	1	0	0	0	0	0	1	0	0	1	0	0	0	0	1	0	5.13333
1	22.4438	1	1	0	0	0	0	0			220	12277	0	0	1	6	0	0	0	1	0	0	0	0	1	0	0	0	0	0	0	0	0	0	0	6
1	36.4219	1	1	0	0	0	0	0			28	862900	1	1	1	1.76667	0	0	0	1	0	0	0	0	1	0	0	1	1	0	1	1	0	0	0	1.1
1	21.0247	1	1	0	0	0	0	0			398	222200	0	0	1	6	0	0	0	1	0	0	0	0	1	0	0	0	0	0	0	0	0	0	0	6
1	39.0521	1	1	0	0	0	0	0			358	21076	0	0	1	6	0	0	0	1	0	0	0	0	1	0	0	0	0	0	0	0	0	0	0	6
1	40.3562	1	0	1	0	0	0	0			538	40700	0	0	0	6	0	0	0	1	0	0	0	0	1	0	0	0	0	0	0	0	0	0	0	6
1	27.2411	1	1	0	0	0	0	0			280	174900	0	0	1	6	0	0	0	1	0	0	0	0	1	0	0	0	1	1	0	0	0	0	0	0.633333
1	34.389	1	1	0	0	0	1	0			511	363	0	0	0	6	0	0	0	1	0	0	0	0	1	0	0	0	0	0	0	0	0	0	0	6
1	41.8466	1	0	0	1	0	0	1			279	28082	0	0	1	6	0	0	0	0	1	0	0	0	1	0	0	0	1	1	0	0	0	0	0	1
1	46.1534	1	0	0	1	0	0	1			159	57487	0	1	1	6	0	0	0	0	1	0	0	0	1	0	0	0	0	0	0	0	0	0	0	6
1	28.926	1	1	0	0	0	1	0			308	93276	0	0	1	6	0	0	0	0	1	0	0	0	1	0	0	0	0	0	0	0	0	0	0	6
1	42.4	1	0	0	1	0	0	1			823	1859	0	0	0	6	0	0	0	0	1	0	0	0	1	0	0	0	1	1	0	0	0	0	0	3.03333
1	35.7753	1	0	0	1	0	0	1			229	13336	0	0	1	6	0	0	0	0	1	0	0	0	1	0	0	0	0	0	0	0	0	0	0	6
1	32.7781	1	0	0	1	0	0	1			459	458	0	0	1	6	0	0	0	0	1	0	0	0	1	0	0	0	1	1	0	0	0	0	0	3.03333
1	44.674	1	0	0	1	0	0	1			116	25833	0	1	1	6	0	0	0	0	1	0	0	0	1	0	0	0	1	1	0	0	0	0	0	2.6
1	42.3507	1	0	0	1	0	0	1			130	259200	0	1	1	5.8	0	0	0	0	1	0	0	0	1	0	0	0	1	1	0	0	0	0	0	3.73333
1	43.1671	1	0	0	1	0	0	1			305	8210	0	0	1	6	0	0	0	1	0	0	0	0	1	0	0	0	1	1	0	0	0	0	0	0.7
1	33.674	1	0	0	1	0	0	1			411	635	0	0	1	6	0	0	0	1	0	0	0	0	1	0	0	0	1	1	0	0	0	0	0	2.8
1	39.1425	1	0	0	1	0	0	1			411	15438	0	0	1	4.93333	0	0	0	1	0	0	0	0	1	0	0	0	1	1	0	0	0	0	0	1.86667
1	40.9041	1	0	0	1	0	0	1			200	210600	0	0	1	6	0	0	0	0	1	0	0	0	1	0	0	0	0	0	0	0	0	0	0	6
1	41.4959	1	1	0	0	0	0	0			334	26312	0	0	1	6	0	0	0	0	1	0	0	0	1	0	0	0	1	1	0	0	0	0	0	3.96667
1	37.3041	1	1	0	0	0	1	0			833	2582	0	0	0	6	0	0	0	0	1	0	0	0	1	0	0	0	0	0	0	0	0	0	0	6
1	27.4932	1	1	0	0	0	0	0			506	6788	0	0	0	6	0	0	0	0	1	0	0	0	1	0	0	0	0	0	0	0	0	0	0	6
1	38.5233	1	1	0	0	0	0	0			388	7538	0	0	1	6	0	0	0	0	1	0	0	0	1	0	0	0	0	0	0	0	0	0	0	6
1	25.8767	1	1	0	0	0	0	0			106	192500	0	1	1	6	0	0	0	0	1	0	0	0	1	0	0	0	1	1	0	0	0	0	0	0.666667
1	45.8603	1	1	0	0	0	0	0			512	39965	0	0	0	6	0	0	0	0	1	0	0	0	0	0	1	0	0	0	0	0	0	0	0	6
1	25.7589	1	1	0	0	0	0	0			348	288000	0	0	1	6	0	0	0	1	0	0	0	0	0	0	1	0	1	0	1	1	0	0	0	1.43333
1	21.0795	1	1	0	0	0	0	0			175	9788	0	1	1	6	0	0	0	0	1	0	0	0	1	0	0	0	0	0	0	0	0	0	0	6
1	48.2438	1	1	0	0	0	0	1			287	14272	0	0	1	6	0	0	0	0	1	0	0	0	1	0	0	0	0	0	0	0	0	0	0	6
1	56.0384	1	0	0	1	0	0	1			406	63276	0	0	1	6	0	0	0	0	1	0	0	0	1	0	0	0	1	1	0	0	0	0	0	1.86667
1	40.6493	1	0	0	1	0	0	1			219	111300	0	0	1	6	0	0	0	0	1	0	0	0	1	0	0	0	0	0	0	0	0	0	0	6
1	41.0329	1	0	0	1	0	0	1			281	6695	0	0	1	6	0	0	0	1	0	0	0	0	1	0	0	0	1	1	0	0	0	0	0	5.6
1	36.0932	1	0	0	1	0	0	1			356	21917	0	0	1	6	0	0	0	1	0	0	0	0	1	0	0	0	1	1	0	0	0	0	0	2.33333
1	25.537	1	1	0	0	0	0	0			326	6576	0	0	1	6	0	0	0	0	1	0	0	0	1	0	0	0	1	0	0	0	0	1	0	0.466667
1	19.9205	1	1	0	0	0	0	0			344	83437	0	0	1	6	0	0	0	0	1	0	0	0	1	0	0	0	1	0	0	0	0	1	0	0.466667
1	36.9918	1	1	0	0	0	0	0			9	208400	1	1	1	6	0	0	1	0	0	0	0	0	1	0	0	0	1	1	0	0	0	0	0	1.9
1	22.8	1	1	0	0	0	0	0			314	67444	0	0	1	6	0	0	0	0	1	0	0	0	1	0	0	0	0	0	0	0	0	0	0	6
1	56.4548	1	0	0	1	0	0	1			378	8181	0	0	1	6	0	0	0	0	1	0	0	0	1	0	0	0	0	0	0	0	0	0	0	6
1	33.3096	1	1	0	0	0	0	0			309	1438	0	0	1	6	0	0	0	0	1	0	0	0	1	0	0	0	1	1	0	0	0	0	0	1.33333
1	19.7671	1	1	0	0	0	0	0			287	86200	0	0	1	6	0	0	0	0	1	0	0	0	1	0	0	0	1	1	0	0	0	0	0	4.43333
1	24.5863	1	1	0	0	0	0	0			297	92794	0	0	1	6	0	0	0	0	1	0	0	0	0	1	0	0	0	0	0	0	0	0	0	6
1	28.7233	1	1	0	0	0	0	0			414	119300	0	0	1	6	0	0	0	0	1	0	0	0	1	0	0	0	1	1	0	0	0	0	0	0.533333
1	37.4082	1	0	0	1	0	1	1			363	38093	0	0	1	6	0	0	0	0	1	0	0	0	1	0	0	0	0	0	0	0	0	0	0	6
1	29.1397	1	1	0	0	0	0	0			354	156300	0	0	1	6	0	0	0	0	1	0	0	0	0	1	0	0	0	0	0	0	0	0	0	6
1	43.0192	1	0	0	1	0	0	1			268	7540	0	0	1	6	0	0	0	1	0	0	0	0	1	0	0	0	1	1	0	0	0	0	0	5.36667
1	37.7233	1	1	0	0	0	0	0			74	183300	1	1	1	6	0	0	0	0	1	0	0	0	1	0	0	0	1	1	0	0	0	0	0	0.3
1	26.1808	1	1	0	0	0	0	0			251	3348	0	0	1	6	0	0	0	0	1	0	0	0	1	0	0	0	0	0	0	0	0	0	0	6
1	22.4027	1	1	0	0	0	0	0			208	29119	0	0	1	6	0	0	0	0	1	0	0	0	1	0	0	0	0	0	0	0	0	0	0	6
1	44.9753	0	0	0	1	0	1	1			320	25983	0	0	1	5.13333	0	0	0	0	1	0	0	0	1	0	0	0	1	1	0	0	0	0	0	1.63333
1	27.189	1	1	0	0	0	0	0			444	13867	0	0	1	0.8	0	0	0	0	1	0	0	0	1	0	0	0	1	0	1	0	1	0	0	0.8
1	24.6301	1	1	0	0	0	0	0			441	32632	0	0	1	2.33333	0	0	0	0	1	0	0	0	1	0	0	0	1	1	0	0	0	0	0	0.7
1	17.8219	1	1	0	0	0	0	0			849	177200	0	0	0	6	0	0	0	0	1	0	0	0	1	0	0	0	1	1	0	0	0	0	0	0.233333
1	23.7452	1	1	0	0	0	0	0			616	5471	0	0	0	6	0	0	0	0	1	0	0	0	1	0	0	0	1	1	0	0	0	0	0	2.9
1	24.537	1	1	0	0	0	1	0			472	45923	0	0	1	6	0	0	0	0	1	0	0	0	1	0	0	0	1	1	0	0	0	0	0	0.466667
1	20.9178	1	1	0	0	0	0	0			262	136200	0	0	1	6	0	0	0	0	1	0	0	0	1	0	0	0	1	1	0	0	0	0	0	0.466667
1	21.1014	1	1	0	0	0	0	0			412	2807	0	0	1	6	0	0	0	0	1	0	0	0	1	0	0	0	1	0	0	0	0	1	0	0.466667
1	49.7233	0	0	0	1	0	0	1			287	32042	0	0	1	5.66667	0	0	0	0	1	0	0	0	1	0	0	0	1	1	0	0	0	0	0	1.3
1	41.7973	1	0	0	1	0	0	1			337	13157	0	0	1	6	0	0	0	0	1	0	0	0	1	0	0	0	0	0	0	0	0	0	0	6
1	44.1753	1	0	0	1	0	0	1			578	10811	0	0	0	6	0	0	0	0	1	0	0	0	1	0	0	0	0	0	0	0	0	0	0	6
1	41.726	1	0	0	1	0	0	1			62	52926	0	1	1	6	0	0	0	0	1	0	0	0	1	0	0	0	1	1	0	0	0	0	0	2.1
1	41.1781	1	0	0	1	0	0	1			273	112600	0	0	1	6	0	0	0	0	1	0	0	0	1	0	0	0	0	0	0	0	0	0	0	6
1	32.6027	1	1	0	0	0	0	0			266	1675000	0	0	1	0.466667	0	0	0	0	1	0	0	0	1	0	0	0	1	0	1	0	1	0	0	0.5
1	30.0795	1	1	0	0	0	0	0			80	50967	0	1	1	6	0	0	0	0	1	0	0	0	1	0	0	0	1	0	0	0	0	1	0	0.466667
1	24.9041	1	1	0	0	0	0	0			219	46096	0	0	1	6	0	0	0	0	1	0	0	0	1	0	0	0	0	0	0	0	0	0	0	6
1	18.7562	1	1	0	0	0	0	0			495	59389	0	0	1	6	0	0	0	0	1	0	0	0	1	0	0	0	0	0	0	0	0	0	0	6
1	23.6027	1	1	0	0	0	0	0			349	40554	0	0	1	6	0	0	0	0	1	0	0	0	1	0	0	0	0	0	0	0	0	0	0	6
1	56.4137	1	0	0	1	0	1	0			266	34253	0	0	1	6	0	1	0	0	0	0	0	0	1	0	0	0	1	1	0	0	0	0	0	2.8
1	33.2055	1	1	0	0	0	0	0			232	3601	0	0	1	6	0	0	0	0	1	0	0	0	1	0	0	0	0	0	0	0	0	0	0	6
1	50.8192	1	0	0	1	0	0	1			566	96492	0	0	0	6	0	0	0	1	0	0	0	0	1	0	0	0	1	1	0	0	0	0	0	0.466667
1	35.3096	0	0	0	1	0	0	1			758	8897	0	0	0	3.86667	0	0	0	0	1	0	0	0	1	0	0	0	1	1	0	0	0	0	0	1.6
1	38.2192	1	0	0	1	0	1	1			675.7	4162	0	0	0	6	1	0	0	0	0	0	0	0	1	0	0	0	0	0	0	0	0	0	0	6
1	29.1425	1	1	0	0	0	0	0			97	248400	1	1	1	6	0	0	0	0	1	0	0	0	1	0	0	0	1	0	0	0	0	1	0	0.466667
1	56.8247	1	1	0	0	0	0	0			155	48536	0	1	1	6	0	0	0	0	1	0	0	0	1	0	0	0	1	1	0	0	0	0	0	4.2
1	24.9288	1	1	0	0	0	0	0			366	68416	0	0	1	6	0	0	0	0	1	0	0	0	1	0	0	0	1	0	0	0	0	1	0	2.33333
1	21.7315	1	1	0	0	0	0	0			621	3213	0	0	0	3.2	0	0	0	0	1	0	0	0	1	0	0	0	1	1	0	0	0	0	0	1.43333
1	23.863	1	1	0	0	0	0	0			349	84232	0	0	1	6	0	0	0	0	1	0	0	0	1	0	0	0	1	0	0	0	0	1	0	5.36667
1	33.3151	1	0	0	1	0	1	1			383	62055	0	0	1	6	0	0	0	0	1	0	0	0	1	0	0	0	1	1	0	0	0	0	0	1.16667
1	25.6493	1	1	0	0	0	0	0			335	64336	0	0	1	6	0	0	0	0	1	0	0	0	1	0	0	0	1	1	0	0	0	0	0	0.7
1	16.8795	1	1	0	0	0	0	0			433	54442	0	0	1	6	0	0	0	0	1	0	0	0	1	0	0	0	0	0	0	0	0	0	0	6
1	30.1753	1	1	0	0	0	0	0			219	35735	0	0	1	6	0	0	0	0	1	0	0	0	1	0	0	0	0	0	0	0	0	0	0	6
1	47.9753	1	0	0	1	0	0	1			357	10643	0	0	1	6	0	0	1	0	0	0	0	0	1	0	0	0	0	0	0	0	0	0	0	6
1	37.8932	1	0	0	1	0	0	1			423	47385	0	0	1	1.9	0	0	0	0	1	0	0	0	1	0	0	0	1	0	1	0	1	0	0	1.9
1	36.8712	1	0	0	1	0	1	1			707	5749	0	0	0	5.86667	0	0	0	0	1	0	0	0	1	0	0	0	1	0	0	0	0	1	0	5.13333
1	27.7096	1	1	0	0	0	0	0			353	33850	0	0	1	6	0	0	0	0	1	0	0	0	1	0	0	0	0	0	0	0	0	0	0	6
1	33.0521	1	1	0	0	0	0	0			199	139700	0	1	1	6	0	0	0	0	1	0	0	0	1	0	0	0	1	1	0	0	0	0	0	0.233333
1	28.9397	1	1	0	0	0	0	0			501	62717	0	0	0	6	0	0	0	0	1	0	0	0	0	0	1	0	1	1	0	0	0	0	0	0.933333
1	24.6932	1	1	0	0	0	0	0			139	79860	0	1	1	6	0	0	0	0	1	0	0	0	1	0	0	0	1	1	0	0	0	0	0	0.966667
1	22.1397	1	1	0	0	0	0	0			522	66949	0	0	0	6	0	0	0	0	1	0	0	0	1	0	0	0	0	0	0	0	0	0	0	6
1	37.3836	1	1	0	0	0	1	0			195	75107	0	1	1	6	0	0	0	0	1	0	0	0	1	0	0	0	1	1	0	0	0	0	0	2.33333
1	28.811	1	1	0	0	0	0	0			548	9109	0	0	0	6	0	0	0	0	1	0	0	0	1	0	0	0	0	0	0	0	0	0	0	6
1	33.7178	0	0	0	1	0	0	0			3	200900	0	1	1	5.23333	0	0	0	0	1	0	0	0	1	0	0	0	1	1	0	0	0	0	0	3.36667
1	19.5863	1	1	0	0	0	0	0			744	3097	0	0	0	6	0	0	0	0	1	0	0	0	1	0	0	0	0	0	0	0	0	0	0	6
1	32.6877	1	1	0	0	0	1	0			123	69427	1	1	1	6	0	0	0	0	1	0	0	0	1	0	0	0	0	0	0	0	0	0	0	6
1	26.337	1	1	0	0	0	0	0			226	1651	0	0	1	6	0	0	0	0	1	0	0	0	1	0	0	0	0	0	0	0	0	0	0	6
1	28.2	1	1	0	0	0	0	0			399	359800	0	0	1	6	0	0	0	0	1	0	0	0	1	0	0	0	1	1	0	0	0	0	0	0.3
1	35.0329	1	1	0	0	0	1	0			254	26574	0	0	1	6	0	0	0	0	1	0	0	0	1	0	0	0	0	0	0	0	0	0	0	6
1	42.3918	0	0	0	1	0	0	1			243	183300	0	0	1	6	0	0	0	0	1	0	0	0	1	0	0	0	1	1	0	0	0	0	0	0.966667
1	32.4247	1	1	0	0	0	0	0			497	13924	0	0	1	6	0	0	0	0	1	0	0	0	1	0	0	0	0	0	0	0	0	0	0	6
1	30.737	1	1	0	0	0	0	0			308	271600	0	0	1	4	0	0	0	0	1	0	0	0	1	0	0	0	1	1	0	0	0	0	0	1.86667
1	25.8329	1	1	0	0	0	0	0			104	36599	1	1	1	6	0	0	0	0	1	0	0	0	1	0	0	0	0	0	0	0	0	0	0	6
1	33.6329	1	1	0	0	0	0	0			534	19391	0	0	0	6	0	0	0	0	1	0	0	0	1	0	0	0	0	0	0	0	0	0	0	6
1	30.4192	1	1	0	0	0	0	0			521	65568	0	0	0	1.3	0	0	0	0	1	0	0	0	1	0	0	0	1	0	1	0	1	0	0	1.3
1	27.9151	1	1	0	0	0	0	0			94	10000000	1	1	1	6	0	0	0	0	1	0	0	0	1	0	0	0	1	1	0	0	0	0	0	0.466667
1	49.5041	1	1	0	0	0	1	0			142	79849	1	1	1	6	0	0	0	0	1	0	0	0	1	0	0	0	1	1	0	0	0	0	0	0.333333
1	22.0548	1	1	0	0	0	0	0			351	45995	0	0	1	6	0	0	0	0	1	0	0	0	1	0	0	0	0	0	0	0	0	0	0	6
1	25.6986	1	1	0	0	0	0	0			391	8872	0	0	1	6	0	0	0	0	1	0	0	0	1	0	0	0	0	0	0	0	0	0	0	6
1	44.1781	1	1	0	0	0	0	0			26	203000	1	1	1	6	0	0	0	0	1	0	0	0	1	0	0	0	1	0	0	0	0	1	0	3.83333
1	56.2548	1	0	0	1	0	0	1			195	41599	0	1	1	6	0	0	0	0	1	0	0	0	0	0	1	0	0	0	0	0	0	0	0	6
1	23.1699	1	1	0	0	0	0	0			351	39495	0	0	1	6	0	0	0	0	1	0	0	0	1	0	0	0	1	1	0	0	0	0	0	1.63333
1	35.989	1	0	0	1	0	0	1			573	6757	0	0	0	6	0	0	0	0	1	0	0	0	1	0	0	0	0	0	0	0	0	0	0	6
1	22.0356	1	1	0	0	0	0	0			781	47695	0	0	0	6	0	0	0	0	1	0	0	0	1	0	0	0	0	0	0	0	0	0	0	6
1	21.3151	1	1	0	0	0	0	0			234	31683	0	0	1	6	0	0	0	0	1	0	0	0	1	0	0	0	1	1	0	0	0	0	0	4.4
1	54.211	1	0	0	1	0	0	1			191	9128	0	1	1	6	0	0	0	0	1	0	0	0	1	0	0	0	1	1	0	0	0	0	0	3.33333
1	19.1425	1	1	0	0	0	0	0			883	35634	0	0	0	0	0	0	0	0	1	0	0	0	1	0	0	0	1	0	1	0	1	0	0	0
1	40.7425	1	1	0	0	0	1	0			75	93057	1	1	1	6	0	0	0	0	1	0	0	0	1	0	0	0	1	0	0	0	0	1	0	4.03333
1	45.1014	1	1	0	0	0	0	0			285	69949	0	0	1	6	0	0	0	0	1	0	0	0	1	0	0	0	0	0	0	0	0	0	0	6
1	47.4219	1	1	0	0	0	0	0			66	155700	1	1	1	6	0	0	0	0	1	0	0	0	1	0	0	0	1	0	1	1	0	0	0	0.466667
1	24.9671	1	1	0	0	0	0	0			483	186700	0	0	1	6	0	0	0	0	1	0	0	0	1	0	0	0	1	1	0	0	0	0	0	2.1
1	59.7863	1	0	0	1	0	1	1			465	28469	0	0	1	6	0	0	0	0	1	0	0	0	1	0	0	0	0	0	0	0	0	0	0	6
1	48.189	1	0	0	1	0	0	1			219	2027	0	0	1	6	0	0	0	0	1	0	0	0	1	0	0	0	0	0	0	0	0	0	0	6
1	34.9041	1	0	0	1	0	0	1			344	27651	0	0	1	6	0	0	0	0	1	0	0	0	1	0	0	0	1	0	0	0	0	1	0	3.73333
1	33.3781	1	0	0	1	0	0	1			502	41206	0	0	0	6	0	0	0	0	1	0	0	0	1	0	0	0	0	0	0	0	0	0	0	6
1	37.3918	1	0	0	1	0	1	1			94	426300	0	1	1	6	0	0	0	0	1	0	0	0	1	0	0	0	1	0	0	0	0	1	0	3.73333
1	44.5233	1	0	0	1	0	0	1			90	737800	0	1	1	6	0	0	0	0	1	0	0	0	1	0	0	0	1	1	0	0	0	0	0	1.4
1	33.3973	1	0	0	1	0	0	1			238	27967	0	0	1	6	0	0	0	0	1	0	0	0	1	0	0	0	0	0	0	0	0	0	0	6
1	27.1425	1	1	0	0	0	1	0			15	745300	1	1	1	6	0	0	0	0	1	0	0	0	1	0	0	0	1	0	0	0	0	1	0	3.73333
1	31.4274	1	1	0	0	0	1	0			168	405700	1	1	1	6	0	0	0	0	1	0	0	0	1	0	0	0	0	0	0	0	0	0	0	6
1	26.9699	1	1	0	0	0	0	0			464	14043	0	0	1	2.9	0	0	0	0	1	0	0	0	1	0	0	0	1	0	1	0	1	0	0	2.9
1	28.8301	0	0	1	0	0	0	0			156	48368	0	1	1	6	0	0	0	0	1	0	0	0	1	0	0	0	0	0	0	0	0	0	0	6
1	21.7315	1	1	0	0	0	0	0			569	16410	0	0	0	6	0	0	0	0	1	0	0	0	1	0	0	0	1	1	0	0	0	0	0	2.8
1	25.5288	1	1	0	0	0	0	0			258	4476	0	0	1	6	0	0	0	0	1	0	0	0	1	0	0	0	1	0	0	0	0	1	0	3.73333
1	27.5479	1	1	0	0	0	0	0			690	7806	0	0	0	6	0	0	0	0	1	0	0	0	1	0	0	0	0	0	0	0	0	0	0	6
1	38.1589	1	0	1	0	0	1	0			12	211100	0	1	1	6	0	0	0	0	1	0	0	0	1	0	0	0	0	0	0	0	0	0	0	6
1	35.1123	1	0	1	0	0	0	0			690	5048	0	0	0	6	0	0	0	0	1	0	0	0	1	0	0	0	1	1	0	0	0	0	0	4.03333
1	31.7452	1	0	0	1	0	0	1			267	51897	0	0	1	4.66667	0	0	0	0	1	0	0	0	1	0	0	0	1	0	1	0	1	0	0	4.7
1	27.0274	1	1	0	0	0	0	0			626	6656	0	0	0	6	0	0	0	0	1	0	0	0	1	0	0	0	0	0	0	0	0	0	0	6
1	54.1342	1	0	0	1	0	0	1			173	226100	0	1	1	6	0	0	0	0	1	0	0	0	1	0	0	0	0	0	0	0	0	0	0	6
1	25.4493	1	1	0	0	0	0	0			326	83421	0	0	1	6	0	0	0	0	1	0	0	0	1	0	0	0	0	0	0	0	0	0	0	6
1	36.9945	0	0	1	0	0	0	0			383	7726	0	0	1	6	0	0	0	0	1	0	0	0	1	0	0	0	1	1	0	0	0	0	0	1.86667
1	23.0658	1	1	0	0	0	0	0			570	36525	0	0	0	5.66667	0	0	0	0	1	0	0	0	1	0	0	0	1	0	1	0	1	0	0	5.7
1	16.9699	1	1	0	0	0	0	0			315	13504	0	0	1	6	0	0	0	0	1	0	0	0	1	0	0	0	0	0	0	0	0	0	0	6
1	24.0822	1	1	0	0	0	0	0			524	17268	0	0	0	6	0	0	0	0	1	0	0	0	1	0	0	0	0	0	0	0	0	0	0	6
1	38.4164	1	0	0	1	0	0	1			396	2659	0	0	1	6	0	0	0	0	1	0	0	0	1	0	0	0	1	1	0	0	0	0	0	4.2
1	41.4521	1	0	0	1	0	0	1			371	373	0	0	1	6	0	0	0	0	1	0	0	0	1	0	0	0	1	1	0	0	0	0	0	2.56667
1	34.1699	1	0	0	1	0	0	1			219	8573	0	0	1	6	0	0	0	0	1	0	0	0	1	0	0	0	0	0	0	0	0	0	0	6
1	35.8575	1	1	0	0	0	0	0			360	25961	0	0	1	6	0	0	0	0	1	0	0	0	1	0	0	0	0	0	0	0	0	0	0	6
1	49.1233	1	0	1	0	0	0	0			472	3583	0	0	1	6	0	0	0	0	1	0	0	0	1	0	0	0	0	0	0	0	0	0	0	6
1	43.2849	1	1	0	0	0	0	0			553	1231	0	0	0	6	0	0	0	0	1	0	0	0	0	0	1	0	1	1	0	0	0	0	0	2.1
1	25.2521	1	1	0	0	0	0	0			351	110500	0	0	1	6	0	0	0	0	1	0	0	0	1	0	0	0	0	0	0	0	0	0	0	6
1	50.2548	1	1	0	0	0	0	0			26	3982000	1	1	1	6	0	0	0	0	1	0	0	0	1	0	0	0	0	0	0	0	0	0	0	6
1	29.1288	1	1	0	0	0	0	0			242	31572	0	0	1	6	0	0	0	0	1	0	0	0	1	0	0	0	0	0	0	0	0	0	0	6
1	20.3151	1	1	0	0	0	0	0			649	906	0	0	0	6	0	0	0	0	1	0	0	0	1	0	0	0	0	0	0	0	0	0	0	6
1	32.2137	1	1	0	0	0	1	0			181	48953	0	1	1	6	0	0	0	0	1	0	0	0	1	0	0	0	0	0	0	0	0	0	0	6
1	23.3288	1	1	0	0	0	0	0			278	16791	0	0	1	6	0	0	0	0	1	0	0	0	1	0	0	0	0	0	0	0	0	0	0	6
1	41.6904	1	0	0	1	0	0	1			359	17120	0	0	1	6	0	0	0	0	1	0	0	0	1	0	0	0	1	1	0	0	0	0	0	3.26667
1	32.8247	0	0	1	0	0	0	0			197	22037	0	1	1	6	0	0	0	0	1	0	0	0	1	0	0	0	0	0	0	0	0	0	0	6
1	34.4384	1	1	0	0	0	1	0			9	135979	1	1	1	6	0	0	0	0	1	0	0	0	1	0	0	0	0	0	0	0	0	0	0	6
1	47.2575	1	0	0	1	0	0	1			278	27861	0	0	1	6	0	0	0	0	1	0	0	0	1	0	0	0	0	0	0	0	0	0	0	6
1	41.5123	1	0	0	1	0	0	1			328	24066	0	0	1	6	0	0	0	0	1	0	0	0	1	0	0	0	0	0	0	0	0	0	0	6
1	40.7726	1	0	0	1	0	0	1			344	2800	0	0	1	6	0	0	0	0	1	0	0	0	1	0	0	0	1	1	0	0	0	0	0	1.63333
1	34.1123	1	0	0	1	0	0	1			408	7337	0	0	1	6	0	0	0	0	1	0	0	0	1	0	0	0	1	1	0	0	0	0	0	1.63333
1	39.2219	1	0	0	1	0	0	1			212	7881	0	0	1	4.93333	0	0	0	0	1	0	0	0	1	0	0	0	1	0	1	0	1	0	0	4.9
1	30.9096	1	0	0	1	0	0	1			532	14285	0	0	0	6	0	0	0	0	1	0	0	0	1	0	0	0	1	1	0	0	0	0	0	1.63333
1	37.3479	1	0	0	1	0	0	1			399	29956	0	0	1	6	0	0	0	0	1	0	0	0	1	0	0	0	1	1	0	0	0	0	0	3.73333
1	38.3562	1	1	0	0	0	0	0			562	5000	0	0	0	6	0	0	0	0	1	0	0	0	0	0	1	0	0	0	0	0	0	0	0	6
1	46.5534	0	0	0	1	0	1	1			309	3927	0	0	1	6	0	0	0	0	1	0	0	0	1	0	0	0	1	0	0	0	0	1	0	2.83333
1	38.5288	1	1	0	0	0	0	0			466	1139	0	0	1	6	0	0	0	0	1	0	0	0	1	0	0	0	0	0	0	0	0	0	0	6
1	35.2219	1	0	0	0	1	0	0			569	11256	0	0	0	6	0	0	0	0	1	0	0	0	1	0	0	0	0	0	0	0	0	0	0	6
1	44.3863	1	1	0	0	0	1	0			336	6270	0	0	1	6	0	0	0	0	1	0	0	0	1	0	0	0	1	1	0	0	0	0	0	0.466667
1	36.6274	1	1	0	0	0	0	1			368	68046	0	0	1	6	0	0	0	0	1	0	0	0	1	0	0	0	1	0	1	1	0	0	0	2.56667
1	38.4137	1	1	0	0	0	0	0			1109	455	0	0	0	6	0	0	0	0	1	0	0	0	1	0	0	0	0	0	0	0	0	0	0	6
1	40.7562	1	0	1	0	0	1	0			251	24380	0	0	1	6	0	0	0	0	1	0	0	0	1	0	0	0	0	0	0	0	0	0	0	6
1	29.4192	1	0	1	0	0	0	0			666	20531	0	0	0	6	0	0	0	0	1	0	0	0	1	0	0	0	1	1	0	0	0	0	0	2.1
1	26.1699	1	1	0	0	0	0	0			257	647964	0	0	1	6	0	0	0	0	1	0	0	0	1	0	0	0	1	1	0	0	0	0	0	0.466667
1	33.3671	1	1	0	0	0	0	0			38.1	94261	1	1	1	6	0	0	0	0	1	0	0	0	1	0	0	0	1	0	1	1	0	0	0	3.1
1	42.1671	1	0	0	1	0	0	1			223	67296	0	0	1	6	0	0	0	0	1	0	0	0	1	0	0	0	0	0	0	0	0	0	0	6
1	52.2685	1	1	0	0	0	1	0			152	496668	1	1	1	6	0	0	0	0	1	0	0	0	1	0	0	0	0	0	0	0	0	0	0	6
1	40.326	1	0	0	1	0	0	1			522	178	0	0	0	6	0	0	0	0	1	0	0	0	1	0	0	0	0	0	0	0	0	0	0	6
1	26.2027	1	1	0	0	0	0	1			774	1265	0	0	0	6	0	0	0	0	1	0	0	0	1	0	0	0	0	0	0	0	0	0	0	6
1	25.5041	1	1	0	0	0	0	0			335	20386	0	0	1	6	0	0	0	0	1	0	0	0	1	0	0	0	1	1	0	0	0	0	0	0.933333
1	31.3151	1	1	0	0	0	0	0			262	20180	0	0	1	6	0	0	0	0	1	0	0	0	1	0	0	0	0	0	0	0	0	0	0	6
1	25.4712	1	1	0	0	0	0	0			434	29215	0	0	1	6	0	0	0	0	1	0	0	0	0	1	0	0	1	1	0	0	0	0	0	4.23333
1	29.7452	1	1	0	0	0	0	0			227	38138	0	0	1	6	0	0	0	0	1	0	0	0	1	0	0	0	1	1	0	0	0	0	0	0.5
1	30.0548	0	0	0	1	0	0	1			248	4285	0	0	1	6	0	0	0	0	1	0	0	0	1	0	0	0	0	0	0	0	0	0	0	6
1	40.0795	1	0	0	1	0	1	1			217	26232	0	0	1	6	0	0	0	0	1	0	0	0	1	0	0	0	1	1	0	0	0	0	0	4.96667
1	36.7644	1	1	0	0	0	0	0			228	12475	0	0	1	6	0	0	0	0	1	0	0	0	1	0	0	0	0	0	0	0	0	0	0	6
1	39.9699	1	1	0	0	0	0	0			58	101370	0	1	1	6	0	0	0	0	1	0	0	0	1	0	0	0	1	1	0	0	0	0	0	2.03333
1	20.1233	1	0	0	1	0	0	1			382	7977	0	0	1	3.5	0	0	0	0	1	0	0	0	1	0	0	0	1	0	1	0	1	0	0	3.5
1	35.8274	1	0	0	1	0	0	0			279	9833	0	0	1	6	0	0	0	0	1	0	0	0	1	0	0	0	0	0	0	0	0	0	0	6
1	39.3342	0	0	0	1	0	0	1			360	2349	0	0	1	6	0	0	0	0	1	0	0	0	1	0	0	0	0	0	0	0	0	0	0	6
1	49.9068	0	0	0	1	0	0	1			106	858959	0	1	1	6	0	0	0	0	0	1	0	0	1	0	0	0	1	1	0	0	0	0	0	0.933333
1	57.8329	1	0	0	1	0	0	1			344	38254	0	0	1	6	0	0	0	0	0	1	0	0	1	0	0	0	1	1	0	0	0	0	0	4.2
1	35.0986	1	1	0	0	0	1	0			262	4250	0	0	1	6	0	0	0	0	0	1	0	0	1	0	0	0	0	0	0	0	0	0	0	6
1	39.6575	0	0	0	1	0	0	1			123	180053	0	1	1	6	0	0	0	0	0	1	0	0	1	0	0	0	0	0	0	0	0	0	0	6
1	31.7205	1	0	0	1	0	1	1			547	13873	0	0	0	6	0	0	0	0	0	1	0	0	1	0	0	0	1	1	0	0	0	0	0	5.13333
1	37.0192	1	0	0	1	0	0	1			236	5718	0	0	1	6	0	0	0	0	0	1	0	0	1	0	0	0	1	1	0	0	0	0	0	3.6
1	38.4329	1	0	0	1	0	0	1			204	64939	0	0	1	6	0	0	0	0	0	1	0	0	1	0	0	0	1	1	0	0	0	0	0	2.1
1	24.8219	1	1	0	0	0	0	0			121	40406	0	1	1	6	0	0	0	0	0	1	0	0	1	0	0	0	0	0	0	0	0	0	0	6
1	30.6301	1	1	0	0	0	0	0			325	17945	0	0	1	6	0	0	0	0	0	1	0	0	1	0	0	0	0	0	0	0	0	0	0	6
1	35.3452	1	1	0	0	0	0	0			301	61735	0	0	1	6	0	0	0	0	0	1	0	0	1	0	0	0	0	0	0	0	0	0	0	6
1	31.0822	1	1	0	0	0	0	0			344	10984	0	0	1	6	0	0	0	0	0	1	0	0	1	0	0	0	0	0	0	0	0	0	0	6
1	26.0219	1	1	0	0	0	0	0			18	359372	0	1	1	6	0	0	0	0	0	1	0	0	1	0	0	0	0	0	0	0	0	0	0	6
1	24.9479	1	1	0	0	0	1	0			433	19905	0	0	1	6	0	0	0	0	0	1	0	0	1	0	0	0	1	1	0	0	0	0	0	1.86667
1	39.5863	1	0	0	1	0	1	1			389	969018	0	0	1	2.66667	0	0	0	0	0	1	0	0	1	0	0	0	1	0	1	0	1	0	0	2.7
1	22.6904	1	1	0	0	0	0	0			368	1496827	0	0	1	6	0	0	0	0	0	1	0	0	1	0	0	0	0	0	0	0	0	0	0	6
1	36.2548	1	1	0	0	0	0	0			336	53093	0	0	1	6	0	0	0	0	0	1	0	0	1	0	0	0	0	0	0	0	0	0	0	6
1	26.6411	1	1	0	0	0	0	0			427	24869	0	0	1	6	0	0	0	0	0	1	0	0	1	0	0	0	0	0	0	0	0	0	0	6
1	26.7918	1	1	0	0	0	0	0			85	61192	1	1	1	6	0	0	0	0	0	1	0	0	1	0	0	0	1	0	1	1	0	0	0	1.63333
1	31.6603	1	1	0	0	0	0	1			588	24116	0	0	0	6	0	0	0	0	0	1	0	0	1	0	0	0	1	1	0	0	0	0	0	5.56667
1	39.9836	1	0	0	1	0	0	1			294	4816	0	0	1	6	0	0	0	0	0	1	0	0	1	0	0	0	1	1	0	0	0	0	0	2.56667
1	29.274	1	1	0	0	0	0	0			459	174700	0	0	1	6	0	0	0	0	0	1	0	0	1	0	0	0	0	0	0	0	0	0	0	6
1	51.1151	1	1	0	0	0	1	0			247	118441	0	0	1	6	0	0	0	0	0	1	0	0	1	0	0	0	0	0	0	0	0	0	0	6
1	40.3014	1	1	0	0	0	0	0			559	18615	0	0	0	6	0	0	0	0	0	1	0	0	1	0	0	0	0	0	0	0	0	0	0	6
1	25.4822	1	1	0	0	0	0	0			191	70220	0	1	1	6	0	0	0	0	0	1	0	0	1	0	0	0	1	1	0	0	0	0	0	0.7
1	35.4767	1	1	0	0	0	0	0			468	379	0	0	1	6	0	0	0	0	0	1	0	0	1	0	0	0	0	0	0	0	0	0	0	6
1	31.4904	1	1	0	0	0	0	0			156	28184	0	1	1	6	0	0	0	0	0	1	0	0	1	0	0	0	1	1	0	0	0	0	0	4.63333
1	40.9699	1	1	0	0	0	0	0			384	64618	0	0	1	6	0	0	0	0	0	1	0	0	1	0	0	0	0	0	0	0	0	0	0	6
1	29.2164	1	1	0	0	0	0	0			350	381	0	0	1	6	0	0	0	0	0	1	0	0	1	0	0	0	1	1	0	0	0	0	0	1.63333
1	43.3014	1	0	0	1	0	0	1			487	21931	0	0	1	6	0	0	0	0	0	1	0	0	1	0	0	0	0	0	0	0	0	0	0	6
1	40.9452	1	0	0	1	0	0	1			224	19979	0	0	1	6	0	0	0	0	0	1	0	0	1	0	0	0	0	0	0	0	0	0	0	6
1	36.0959	1	0	0	1	0	0	1			392	1276	0	0	1	6	0	0	0	0	0	1	0	0	1	0	0	0	0	0	0	0	0	0	0	6
1	47.0986	1	0	0	1	0	0	1			150	74901	0	1	1	6	0	0	0	0	0	1	0	0	1	0	0	0	0	0	0	0	0	0	0	6
1	27.6466	1	1	0	0	0	0	0			29	199364	1	1	1	6	0	0	0	0	0	1	0	0	1	0	0	0	0	0	0	0	0	0	0	6
1	22.3205	1	1	0	0	0	0	0			160	40224	0	1	1	6	0	0	0	0	0	1	0	0	1	0	0	0	0	0	0	0	0	0	0	6
1	51.9836	1	1	0	0	0	1	0			405	18611	0	0	1	6	0	0	0	0	0	1	0	0	1	0	0	0	0	0	0	0	0	0	0	6
1	39.3781	0	0	1	0	0	0	1			417	53640	0	0	1	6	0	0	0	0	0	1	0	0	1	0	0	0	0	0	0	0	0	0	0	6
1	35.6027	0	0	1	0	0	1	0			576	9120	0	0	0	6	0	0	0	0	0	1	0	0	1	0	0	0	1	1	0	0	0	0	0	4.6
1	34.3781	1	0	0	1	0	0	1			211	71751	0	0	1	6	0	0	0	0	0	1	0	0	1	0	0	0	0	0	0	0	0	0	0	6
1	29.9014	0	0	0	1	0	0	1			234.4	386	0	0	1	6	0	0	0	0	0	1	0	0	1	0	0	0	0	0	0	0	0	0	0	6
1	46.3616	1	1	0	0	0	0	0			533	83878	0	0	0	6	0	0	0	0	0	1	0	0	1	0	0	0	0	0	0	0	0	0	0	6
1	33.1014	1	1	0	0	0	0	0			183	68784	0	1	1	6	0	0	0	0	0	1	0	0	1	0	0	0	0	0	0	0	0	0	0	6
1	34.7863	1	1	0	0	0	0	0			230	14566	0	0	1	6	0	0	0	0	0	1	0	0	1	0	0	0	0	0	0	0	0	0	0	6
1	26.7699	1	1	0	0	0	0	0			352	105007	0	0	1	6	0	0	0	0	0	1	0	0	1	0	0	0	0	0	0	0	0	0	0	6
1	27.3507	1	1	0	0	0	0	0			296	5526	0	0	1	6	0	0	0	0	0	1	0	0	1	0	0	0	1	1	0	0	0	0	0	0.966667
1	38.7041	0	0	0	1	0	0	1			345	31215	1	1	1	6	0	0	0	0	0	1	0	0	1	0	0	0	0	0	0	0	0	0	0	6
1	45.5562	0	0	0	1	0	0	1			412	18665	0	0	1	6	0	0	0	0	0	1	0	0	1	0	0	0	1	1	0	0	0	0	0	0.933333
1	51.5781	1	0	0	1	0	0	1			78	174364	0	1	1	6	0	0	0	0	0	1	0	0	1	0	0	0	1	1	0	0	0	0	0	3.96667
1	35.8438	1	0	0	1	0	0	1			188	97266	0	1	1	3.96667	0	0	0	0	0	1	0	0	1	0	0	0	1	0	1	0	1	0	0	4
1	36.4685	1	0	0	1	0	0	1			386	3769	0	0	1	6	0	0	0	0	0	1	0	0	1	0	0	0	0	0	0	0	0	0	0	6
1	44.6603	1	0	0	1	0	0	1			138	14828	0	1	1	6	0	0	0	0	0	1	0	0	1	0	0	0	0	0	0	0	0	0	0	6
1	18.8274	1	1	0	0	0	0	0			165.6	165470	0	1	1	6	0	0	0	0	0	1	0	0	1	0	0	0	0	0	0	0	0	0	0	6
1	34.7096	1	1	0	0	0	0	0			2	84379	1	1	1	0.466667	0	0	0	0	0	1	0	0	1	0	0	0	1	0	1	0	1	0	0	0.5
1	27.4301	1	1	0	0	0	0	0			124	2405191	1	1	1	6	0	0	0	0	0	1	0	0	0	1	0	0	1	1	0	0	0	0	0	2.33333
1	50.2849	0	0	1	0	0	0	0			3	221586	1	1	1	6	0	0	0	0	0	1	0	0	1	0	0	0	0	0	0	0	0	0	0	6
1	23.9425	1	1	0	0	0	0	0			8	354231	0	1	1	6	0	0	0	0	0	1	0	0	1	0	0	0	0	0	0	0	0	0	0	6
1	36.4849	1	1	0	0	0	0	0			292	223875	1	1	1	6	0	0	0	0	0	1	0	0	1	0	0	0	0	0	0	0	0	0	0	6
1	35.2466	1	1	0	0	0	0	0			442	78649	0	0	1	6	0	0	0	0	0	1	0	0	1	0	0	0	0	0	0	0	0	0	0	6
1	31.4027	1	1	0	0	0	0	0			600	6530	0	0	0	6	0	0	0	0	0	1	0	0	1	0	0	0	0	0	0	0	0	0	0	6
1	38.5726	1	1	0	0	0	0	0			429	22169	0	0	1	6	0	0	0	0	0	1	0	0	1	0	0	0	0	0	0	0	0	0	0	6
1	38.4658	1	0	0	1	0	0	1			582	24865	0	0	0	6	0	0	0	0	0	1	0	0	1	0	0	0	0	0	0	0	0	0	0	6
1	32.2438	1	0	0	1	0	0	1			442	10811	0	0	1	6	0	0	0	0	0	1	0	0	1	0	0	0	0	0	0	0	0	0	0	6
1	45.0877	1	1	0	0	0	0	0			25	39796	1	1	1	6	0	0	0	0	0	1	0	0	1	0	0	0	0	0	0	0	0	0	0	6
1	37.9151	1	1	0	0	0	0	0			549	15117	0	0	0	6	0	0	0	0	0	1	0	0	1	0	0	0	1	1	0	0	0	0	0	0.7
1	27.6795	1	1	0	0	0	0	0			92	68482	1	1	1	6	0	0	0	0	0	1	0	0	1	0	0	0	1	1	0	0	0	0	0	4.86667
1	21.4493	1	0	0	0	1	0	0			540	162049	0	0	0	6	0	0	0	0	0	1	0	0	1	0	0	0	1	1	0	0	0	0	0	2.06667
1	37.1726	1	0	0	1	0	0	1			93	213153	0	1	1	6	0	0	0	0	0	1	0	0	1	0	0	0	1	1	0	0	0	0	0	0.933333
1	38.8822	1	1	0	0	0	0	0			483	31020	0	0	1	6	0	0	0	0	0	1	0	0	1	0	0	0	0	0	0	0	0	0	0	6
1	26.789	1	1	0	0	0	0	0			226	15116	0	0	1	6	0	0	0	0	0	1	0	0	1	0	0	0	1	0	0	0	0	1	0	0.466667
1	21.5671	1	1	0	0	0	0	0			881	112986	0	0	0	6	0	0	0	0	0	1	0	0	1	0	0	0	1	1	0	0	0	0	0	1.66667
1	44.7425	1	1	0	0	0	0	0			696	33749	0	0	0	6	0	0	0	0	0	1	0	0	0	1	0	0	1	0	0	0	0	1	0	1.86667
1	29.4082	1	1	0	0	0	1	0			100	305689	1	1	1	6	0	0	0	0	0	1	0	0	1	0	0	0	1	0	1	1	0	0	0	3.73333
1	43.5863	1	0	0	1	0	1	1			253	147	0	0	1	6	0	0	0	0	0	1	0	0	1	0	0	0	0	0	0	0	0	0	0	6
1	38.9452	1	0	0	1	0	0	1			474	9370	0	0	1	6	0	0	0	0	0	1	0	0	1	0	0	0	0	0	0	0	0	0	0	6
1	29.674	1	1	0	0	0	0	0			34	105197	1	1	1	6	0	0	0	0	0	1	0	0	1	0	0	0	0	0	0	0	0	0	0	6
1	38.5973	1	1	0	0	0	0	0			271	100187	0	0	1	6	0	0	0	0	0	1	0	0	1	0	0	0	0	0	0	0	0	0	0	6
1	34.6055	1	0	0	1	0	0	1			210.4	21680	0	0	1	6	0	0	0	0	0	1	0	0	1	0	0	0	0	0	0	0	0	0	0	6
1	31.8932	1	1	0	0	0	0	0			745	38620	0	0	0	6	0	0	0	0	0	1	0	0	1	0	0	0	0	0	0	0	0	0	0	6
1	57.6603	1	0	0	1	0	0	1			208	87850	0	0	1	6	0	0	0	0	0	1	0	0	1	0	0	0	0	0	0	0	0	0	0	6
1	24.6247	1	1	0	0	0	0	0			288	5831	0	0	1	0	0	0	0	0	0	1	0	0	1	0	0	0	1	0	1	0	1	0	0	0
1	35.3562	1	0	0	1	0	0	1			337	22598	0	0	1	6	0	0	0	0	0	1	0	0	1	0	0	0	0	0	0	0	0	0	0	6
1	30.4411	1	1	0	0	0	0	0			555	4304	0	0	0	6	0	0	0	0	0	1	0	0	0	1	0	0	1	0	0	0	0	1	0	2.23333
1	56.0685	1	1	0	0	0	0	0			456	28711	0	0	1	6	0	0	0	0	0	1	0	0	0	1	0	0	1	1	0	0	0	0	0	1.16667
1	28.7479	1	1	0	0	0	0	0			65	139230	0	1	1	6	0	0	0	0	0	1	0	0	1	0	0	0	1	1	0	0	0	0	0	0.933333
1	21.0712	1	1	0	0	0	0	0			199	8733	1	1	1	6	0	0	0	0	0	1	0	0	1	0	0	0	1	1	0	0	0	0	0	0.3
1	23.4767	1	1	0	0	0	0	0			549	4753	0	0	0	6	0	0	0	0	0	1	0	0	1	0	0	0	1	0	0	0	0	1	0	0.933333
1	38.5096	1	0	0	1	0	0	1			459	2167	0	0	1	6	0	0	0	0	0	1	0	0	1	0	0	0	1	1	0	0	0	0	0	0.566667
1	24.3425	1	1	0	0	0	0	0			416	22577	0	0	1	6	0	0	0	0	0	1	0	0	1	0	0	0	1	0	0	0	0	1	0	0.933333
1	30.189	1	1	0	0	0	0	0			281	39677	0	0	1	6	0	0	0	0	0	1	0	0	1	0	0	0	0	0	0	0	0	0	0	6
1	37.5096	1	1	0	0	0	0	0			800	25422	0	0	0	6	0	0	0	0	0	1	0	0	1	0	0	0	0	0	0	0	0	0	0	6
1	49.7205	1	0	0	1	0	0	1			252	20816	0	0	1	6	0	0	0	0	0	1	0	0	1	0	0	0	0	0	0	0	0	0	0	6
1	36.1534	1	1	0	0	0	0	0			127	130949	0	1	1	6	0	0	0	0	0	1	0	0	1	0	0	0	1	0	0	0	0	1	0	0.4
1	35.5151	0	0	0	1	0	0	1			160	9283	0	1	1	6	0	0	0	0	0	1	0	0	1	0	0	0	0	0	0	0	0	0	0	6
1	38.0959	1	0	0	1	0	0	1			321	3198	0	0	1	6	0	0	0	0	0	1	0	0	1	0	0	0	0	0	0	0	0	0	0	6
1	32.7096	1	1	0	0	0	0	0			1	112829	1	1	1	1.36667	0	0	0	0	0	1	0	0	1	0	0	0	1	1	0	0	0	0	0	0.566667
1	52.2137	1	0	1	0	0	0	0			12	183694	1	1	1	6	0	0	0	0	0	1	0	0	0	1	0	0	0	0	0	0	0	0	0	6
1	31.5507	1	1	0	0	0	0	0			356	2165	0	0	1	6	0	0	0	0	0	1	0	0	1	0	0	0	0	0	0	0	0	0	0	6
1	38.6055	1	0	0	1	0	1	1			165	79114	0	1	1	6	0	0	0	0	0	1	0	0	1	0	0	0	0	0	0	0	0	0	0	6
1	25.7123	1	1	0	0	0	0	1			465.1	10000001	0	0	1	6	0	0	0	0	0	1	0	0	0	1	0	0	0	0	0	0	0	0	0	6
1	42.0329	1	0	0	1	0	0	1			155	20737	0	1	1	6	0	0	0	0	0	1	0	0	1	0	0	0	1	1	0	0	0	0	0	2.33333
1	46.5425	1	0	0	1	0	0	1			87	10502	0	1	1	6	0	0	0	0	0	1	0	0	1	0	0	0	1	0	1	1	0	0	0	1.36667
1	29.5863	1	1	0	0	0	1	0			453	3969	0	0	1	6	0	0	0	0	0	1	0	0	1	0	0	0	0	0	0	0	0	0	0	6
1	56.1616	1	0	0	1	0	0	1			596	1122	0	0	0	6	0	0	0	0	0	1	0	0	0	1	0	0	1	0	0	0	0	0	1	5.6
1	24.2137	1	1	0	0	0	0	0			290	103878	0	0	1	6	0	0	0	0	0	1	0	0	1	0	0	0	0	0	0	0	0	0	0	6
[truncated: 1,656 more rows]
